# Supplementary material for: Coagulative safety of epidural catheters after major upper gastrointestinal surgery: advanced and routine coagulation analysis in 38 patients
Source: PubMed Central journal article supplement (PMC5067910; doi:10.1186/s13741-016-0053-0), 2016-10-18
Supplement: 13741_2016_53_MOESM4_ESM.pdf [file 13741_2016_53_MOESM4_ESM.pdf]

**Supplementary File 4: Test results from the patient with thrombocytopenia and low factor XIII at inadvertent withdrawal of their epidural catheter.**

|                                  | Preoperative | Postoperative | Reference Range |
|----------------------------------|--------------|---------------|-----------------|
| Hb (g/L)                         | 129          | 133           | 117-170         |
| PT-INR                           | 1.1          | <u>1.5</u>    | 0.9-1.2         |
| aPTT (s)                         | 27           | 32            | 26-33           |
| Plc ( $\times 10^6/L$ )          | 175          | <u>35</u>     | 145-387         |
| Multiplate® ADP AUC              | 60           | <u>29</u>     | 57-113          |
| ROTEM® EXTEM MCF (mm)            | 58           | 54            | 50-72           |
| Creatinine ( $\mu\text{mol/L}$ ) | 77           | 77            | 45-105          |
| Bilirubin ( $\mu\text{mol/L}$ )  | 8            | 8             | 5-25            |
| ALP ( $\mu\text{kat/L}$ )        | 0.75         | 0.91          | 0.6-1.8         |
| Fibrinogen (g/L)                 | 2.05         | <u>4.50</u>   | 2.0-4.0         |
| FVII (kIE/L)                     | 0.84         | 0.77          | 0.6-1.6         |
| FXII (kIE/L)                     | 0.92         | 0.72          | 1.07-1.5        |
| FXIII (kIE/L)                    | 1.06         | <u>0.38</u>   | 0.7-1.4         |
| PIVKA (mg/L)                     | <u>2.03</u>  | <u>2.62</u>   | <2.0            |

Results are underlined to show values outside the reference range.

His preoperative questionnaire and preoperative test results were unremarkable other than the patient reported tablet treated hypertension and a subjective tendency to develop bruises after minor trauma, which had begun around two years ago. The duration of his gastrectomy was 9 hours; 300ml haemorrhage was recorded during the operation and 1130 ml fluid was collected from his drainage during the first 24 hours postoperatively. His Hb decreased from 145 to 122g/L during this period but his first postoperative Plc was  $47 \times 10^6/L$ . This led to suspicion of infection and he was given a prolonged course of antibiotics with cefuroxime but he did not subsequently develop a clinical infection. His epidural catheter was inadvertently withdrawn on the third postoperative day: shortly afterwards, Plc was measured as  $35 \times 10^6/L$ ; ROTEM results were within the normal range but he had a low FXIII of 0.38 kIE/L. He did not develop any neuraxial complications. At follow up two years after the operation he had returned to subjectively normal health. Underlined values indicate results outside the reference range.
