# Supplementary material for: Coagulative safety of epidural catheters after major upper gastrointestinal surgery: advanced and routine coagulation analysis in 38 patients
Source: Springer Nature journal article supplement (doi:10.1186/s13741-016-0053-0), 2016-10-18
Supplement: MOESM2 [file 10899296]

**S2 Supplementary Table: assays taken, reference intervals, apparatuses and reagents used**

| Apparatus/method                                                                                                                                 | Reagent                                                                     | Parameter                                       | Reference interval                                 |
|--------------------------------------------------------------------------------------------------------------------------------------------------|-----------------------------------------------------------------------------|-------------------------------------------------|----------------------------------------------------|
| ROTEM according to manufacturer's instructions (Pentapharm, Munich, Germany). Reversal of coagulation using calcium chloride (StarTEM® reagent). | EXTEM: contains tissue factor (TF), i.e. initiates the extrinsic pathway    | MCF (Maximal clot firmness)                     | 50-72 mm                                           |
|                                                                                                                                                  |                                                                             | CT (Clotting time)                              | 38-79 mm                                           |
|                                                                                                                                                  | INTEM: contains ellagic acid, i.e. initiates the intrinsic pathway          | MCF                                             | 50-72 mm                                           |
|                                                                                                                                                  |                                                                             | CT                                              | 100-240 s                                          |
|                                                                                                                                                  | FIBTEM: contains TF and cytochalasin D, a platelet inhibitor.               | MCF                                             | 9-25 mm                                            |
|                                                                                                                                                  | HEPTEM: contains ellagic acid and heparinase.                               | MCF                                             | 50-72 mm                                           |
|                                                                                                                                                  |                                                                             | CT                                              | 100-240 s                                          |
|                                                                                                                                                  | Multiplate® (Dynabyte GmbH, München, Germany)                               | ADPtest                                         | AUC (Area under curve)                             |
| COLtest                                                                                                                                          |                                                                             | 72-125 U                                        |                                                    |
| TRAPtest                                                                                                                                         |                                                                             | 84-128 U                                        |                                                    |
| ASPItest                                                                                                                                         |                                                                             | 71-115 U                                        |                                                    |
| BCS-XP Coagulation analyzer (Siemens‡)                                                                                                           | Thromborel S‡                                                               | P-FII                                           | 0.70–1.50 kIE/L                                    |
|                                                                                                                                                  | Thromborel S‡                                                               | P-FVII                                          | 0.60–1.60 kIE/L                                    |
|                                                                                                                                                  | Thromborel S‡                                                               | P-FX                                            | 0.70–1.52 kIE/L                                    |
|                                                                                                                                                  | PTT-AutomateΔ                                                               | P-FIX                                           | 0.70–1.30 kIE/L                                    |
|                                                                                                                                                  | PTT-AutomateΔ                                                               | P-FXI                                           | 0.60–1.30 kIE/L                                    |
|                                                                                                                                                  | PTT-AutomateΔ                                                               | P-FXII                                          | 1.07–1.50 kIE/L                                    |
|                                                                                                                                                  | Berichrome FXIII‡                                                           | P-FXIII                                         | 0.70–1.40 kIE/L                                    |
|                                                                                                                                                  | Owren's PT – a combined thromboplastin reagent (MediRox, Nyköping, Sweden)* | PT-INR                                          | 0.9-1.1                                            |
|                                                                                                                                                  | Actin FSL (Siemens‡)                                                        | aPTT                                            | 26-33s                                             |
| CS-5100 (Siemens Healthcare Diagnostics, Marburg, Germany)                                                                                       | Dade Thrombin                                                               | P-Fibrinogen                                    | 2.0-4.0 mg/mL                                      |
|                                                                                                                                                  | Medirox D-dimer                                                             | D-dimer                                         | <0.25mg/L                                          |
|                                                                                                                                                  | Cobas GTT (Roche)                                                           | Gamma-Glutamyltransferase (GT)                  | 0.2-1.9μkat/L                                      |
|                                                                                                                                                  | Cobas CRP-L3 (Roche)                                                        | C-reactive protein (CRP)                        | <3.0mg/L                                           |
|                                                                                                                                                  | BiT3 Cobas (Roche)                                                          | Bilirubin                                       | 5-25μmol/L                                         |
|                                                                                                                                                  | Cobas ALP2 (Roche)                                                          | Alkaline phosphatase (ALP)                      | 0.6-1.8μkat/L                                      |
|                                                                                                                                                  | CREP2 Cobas (Roche)                                                         | Creatinine                                      | 45-90μmol/L                                        |
| Radiometer medical ApS, Brønshøj, Denmark                                                                                                        |                                                                             | Haemoglobin (Hb)                                | Men: 134-170; women: 117-153 g/L.                  |
| Asserachrom® PIVKA-II kit (StagoΔ).                                                                                                              | An enzyme-linked immunosorbent assay using monoclonal antibody p1-2-b9.     | PIVKA-II (Protein induced by vitamin K absence) | <2.0mg/L                                           |
| Sysmex XE 5000 cell counter†                                                                                                                     |                                                                             | Platelet count (Plc)                            | Women: 165–387; men: 145–348 x 10 <sup>9</sup> /L. |

\*assay certified by Equalis, Uppsala, Sweden. ‡Siemens Healthcare Diagnostics,

Marburg, Germany. †Sysmex Corp., Kobe, Japan. ΔStago, Asnières-sur-Seine, France.
