# Supplementary material for: Coagulative safety of epidural catheters after major upper gastrointestinal surgery: advanced and routine coagulation analysis in 38 patients
Source: Springer Nature journal article supplement (doi:10.1186/s13741-016-0053-0), 2016-10-18
Supplement: MOESM3 [file 10899296]

R version 3.2.4 (2016-03-10) -- "Very Secure Dishes"  
Copyright (C) 2016 The R Foundation for Statistical Computing  
Platform: x86\_64-apple-darwin13.4.0 (64-bit)

R is free software and comes with ABSOLUTELY NO WARRANTY.  
You are welcome to redistribute it under certain conditions.  
Type 'license()' or 'licence()' for distribution details.

Natural language support but running in an English locale

R is a collaborative project with many contributors.  
Type 'contributors()' for more information and  
'citation()' on how to cite R or R packages in publications.

Type 'demo()' for some demos, 'help()' for on-line help, or  
'help.start()' for an HTML browser interface to help.  
Type 'q()' to quit R.

During startup - Warning messages:

```
1: Setting LC_CTYPE failed, using "C"  
2: Setting LC_COLLATE failed, using "C"  
3: Setting LC_TIME failed, using "C"  
4: Setting LC_MESSAGES failed, using "C"  
5: Setting LC_MONETARY failed, using "C"
```

```
[R.app GUI 1.67 (7152) x86_64-apple-darwin13.4.0]
```

WARNING: You're using a non-UTF8 locale, therefore only ASCII characters will work.

Please read R for Mac OS X FAQ (see Help) section 9 and adjust your system preferences accordingly.

```
[Workspace restored from /Users/OwainThomas/Dropbox/RESEARCH/EPI/Statistik EPI 2014/.RData]
```

```
[History restored from /Users/OwainThomas/Dropbox/RESEARCH/EPI/Statistik EPI 2014/.Rapp.history]
```

2016-07-06 14:02:50.954 R[5666:3360988] \*\*\* WARNING: Method convertPointFromBase: in class NSView is deprecated on 10.7 and later. It should not be used in new applications.

```
> epi<-read.table(file="epiresultat.txt", header=TRUE,dec=",")  
> epi$preopHEPTEmminusINTEmmcf<-epi$Prov1heptemMCF-epi$Prov1intemMCF  
> epi$postopHEPTEmminusINTEmmcf<-epi$Prov2heptemMCF-epi$Prov2intemMCF  
> mean(epi$PatAge)  
[1] 70.23684  
> sd(epi$PatAge)  
[1] 6.94548  
> min(epi$PatAge)  
[1] 57  
> max(epi$PatAge)  
[1] 82  
>  
> sum(epi$PatSex)  
[1] 27  
> #MCF  
> boxplot(epi$Prov1extemMCF,epi$Prov2extemMCF,-100, epi$Prov1fibtemMCF,epi$Prov2fibtemMCF,-100, epi$Prov1intemMCF,epi$Prov2intemMCF,-100, epi
```

```

$Prov1heptemMCF, epi$Prov2heptemMCF, -100, epi$preopHEPTEMminusINTEMmcf, epi
$postopHEPTEMminusINTEMmcf, horizontal=FALSE, na.rm=TRUE, axes=TRUE, main="Pre-
and postoperative ROTEM MCF Values", cex.main=1.65,
ylim=c(-5,95), cex.axis=1.5, cex.lab=1.45, ylab="Maximum clot firmness (MCF) in
mm", boxwex=1, col=c(24,0,0,24,0,0,24,0,0,24,0,0,24,0), lty=1)
> text(x=1.5,y=90, "EXTEM", pos=3, cex=1.2)
> text(x=4.5,y=90, "FIBTEM", pos=3, cex=1.2)
> text(x=7.5,y=90, "INTEM", pos=3, cex=1.2)
> text(x=10.5,y=90, "HEPTEM", pos=3, cex=1.2)
> text(x=13.5,y=90, "HEPTEM -", pos=3, cex=1.2)
> text(x=13.5,y=85, "INTEM", pos=3, cex=1.2)
> legend(0.7,7, c("Preoperative","Postoperative"), cex= 1, fill=c(24,0))
> legend(5.7,5, lty=3, lwd=2, c("Reference range"))
> arrows(0.4,50,,72,code=0,lwd=2,lty=3)
> arrows(3.4,9,,25,code=0,lwd=2,lty=3)
> arrows(6.4,50,,72,code=0,lwd=2,lty=3)
> arrows(9.4,50,,72,code=0,lwd=2,lty=3)
>
> #hist(epi$Prov1extemMCF)
> #hist(epi$Prov2extemMCF)
> mean(epi$Prov1extemMCF, na.rm=TRUE)
[1] 64.05263
> sd(epi$Prov1extemMCF, na.rm=TRUE)
[1] 7.897818
> mean(epi$Prov2extemMCF, na.rm=TRUE)
[1] 71.66667
> sd(epi$Prov2extemMCF, na.rm=TRUE)
[1] 6.111806
>
> t.test(epi$Prov1extemMCF, epi$Prov2extemMCF, alternative =
c("two.sided"), paired = TRUE)

```

#### Paired t-test

```

data: epi$Prov1extemMCF and epi$Prov2extemMCF
t = -5.0837, df = 32, p-value = 1.558e-05
alternative hypothesis: true difference in means is not equal to 0
95 percent confidence interval:
 -11.247908 -4.812698
sample estimates:
mean of the differences
 -8.030303

```

```

> wilcox.test(epi$Prov1extemMCF, epi$Prov2extemMCF, alternative =
c("two.sided"), paired = TRUE)

```

#### Wilcoxon signed rank test with continuity correction

```

data: epi$Prov1extemMCF and epi$Prov2extemMCF
V = 40, p-value = 7.779e-05
alternative hypothesis: true location shift is not equal to 0

```

#### Warning messages:

```

1: In wilcox.test.default(epi$Prov1extemMCF, epi$Prov2extemMCF, alternative =
c("two.sided"), :
cannot compute exact p-value with ties

```

```

2: In wilcox.test.default(epi$Prov1extemMCF, epi$Prov2extemMCF, alternative =
c("two.sided"), :
  cannot compute exact p-value with zeroes
> x<-1
> y<-85
> arrows(x,y,x+1,y, length=0.05, angle=90, code=1)
> arrows(x,y,x+1,y, length=0.05, angle=90, code=2)
> text(x+0.5,y-3,"**",pos=3, cex=1.4)
>
> #hist(epi$Prov1fibtemMCF)
> #hist(epi$Prov2fibtemMCF)
> mean(epi$Prov1fibtemMCF, na.rm=TRUE)
[1] 20.08108
> sd(epi$Prov1fibtemMCF, na.rm=TRUE)
[1] 7.166195
> mean(epi$Prov2fibtemMCF, na.rm=TRUE)
[1] 33.72727
> sd(epi$Prov2fibtemMCF, na.rm=TRUE)
[1] 9.155848
> t.test(epi$Prov1fibtemMCF,epi$Prov2fibtemMCF,alternative =
c("two.sided"),paired = TRUE)

```

#### Paired t-test

```

data: epi$Prov1fibtemMCF and epi$Prov2fibtemMCF
t = -6.8746, df = 31, p-value = 1.048e-07
alternative hypothesis: true difference in means is not equal to 0
95 percent confidence interval:
 -17.788756 -9.648744
sample estimates:
mean of the differences
 -13.71875

```

```

> wilcox.test(epi$Prov1fibtemMCF,epi$Prov2fibtemMCF,alternative =
c("two.sided"),paired = TRUE)

```

#### Wilcoxon signed rank test with continuity correction

```

data: epi$Prov1fibtemMCF and epi$Prov2fibtemMCF
V = 21, p-value = 5.753e-06
alternative hypothesis: true location shift is not equal to 0

```

#### Warning message:

```

In wilcox.test.default(epi$Prov1fibtemMCF, epi$Prov2fibtemMCF, alternative =
c("two.sided"), :
  cannot compute exact p-value with ties
> x<-4
> y<-85
> arrows(x,y,x+1,y, length=0.05, angle=90, code=1)
> arrows(x,y,x+1,y, length=0.05, angle=90, code=2)
> text(x+0.5,y-3,"**",pos=3, cex=1.4)
>
> #hist(epi$Prov1intemMCF)
> #hist(epi$Prov2intemMCF)
> mean(epi$Prov1intemMCF, na.rm=TRUE)
[1] 63.28947

```

```

> sd(epi$Prov1intemMCF, na.rm=TRUE)
[1] 5.862883
> mean(epi$Prov2intemMCF, na.rm=TRUE)
[1] 69.54545
> sd(epi$Prov2intemMCF, na.rm=TRUE)
[1] 8.551648
> t.test(epi$Prov1intemMCF,epi$Prov2intemMCF,alternative =
c("two.sided"),paired = TRUE)

```

Paired t-test

```

data: epi$Prov1intemMCF and epi$Prov2intemMCF
t = -3.8044, df = 32, p-value = 0.0006047
alternative hypothesis: true difference in means is not equal to 0
95 percent confidence interval:
 -9.956928 -3.012769
sample estimates:
mean of the differences
 -6.484848

```

```

> wilcox.test(epi$Prov1intemMCF,epi$Prov2intemMCF,alternative =
c("two.sided"),paired = TRUE)

```

Wilcoxon signed rank test with continuity correction

```

data: epi$Prov1intemMCF and epi$Prov2intemMCF
V = 60.5, p-value = 0.0002462
alternative hypothesis: true location shift is not equal to 0

```

Warning messages:

```

1: In wilcox.test.default(epi$Prov1intemMCF, epi$Prov2intemMCF, alternative =
c("two.sided"), :
cannot compute exact p-value with ties

```

```

2: In wilcox.test.default(epi$Prov1intemMCF, epi$Prov2intemMCF, alternative =
c("two.sided"), :
cannot compute exact p-value with zeroes

```

```

> x<-7
> y<-85
> arrows(x,y,x+1,y, length=0.05, angle=90, code=1)
> arrows(x,y,x+1,y, length=0.05, angle=90, code=2)
> text(x+0.5,y-3,"**",pos=3, cex=1.4)
>
> #hist(epi$Prov1heptemMCF)
> #hist(epi$Prov2heptemMCF)
> mean(epi$Prov1heptemMCF, na.rm=TRUE)
[1] 62.18421
> sd(epi$Prov1heptemMCF, na.rm=TRUE)
[1] 5.834915
> mean(epi$Prov2heptemMCF, na.rm=TRUE)
[1] 69.40625
> sd(epi$Prov2heptemMCF, na.rm=TRUE)
[1] 6.399896
> t.test(epi$Prov1heptemMCF,epi$Prov2heptemMCF,alternative =
c("two.sided"),paired = TRUE)

```

Paired t-test

```

data: epi$Prov1heptemMCF and epi$Prov2heptemMCF
t = -6.3687, df = 31, p-value = 4.317e-07
alternative hypothesis: true difference in means is not equal to 0
95 percent confidence interval:
 -9.365446 -4.822054
sample estimates:
mean of the differences
      -7.09375

```

```

> wilcox.test(epi$Prov1heptemMCF,epi$Prov2heptemMCF,alternative =
c("two.sided"),paired = TRUE)

```

Wilcoxon signed rank test with continuity correction

```

data: epi$Prov1heptemMCF and epi$Prov2heptemMCF
V = 21.5, p-value = 2.327e-05
alternative hypothesis: true location shift is not equal to 0

```

Warning messages:

```

1: In wilcox.test.default(epi$Prov1heptemMCF, epi$Prov2heptemMCF, alternative =
c("two.sided"), :
  cannot compute exact p-value with ties

```

```

2: In wilcox.test.default(epi$Prov1heptemMCF, epi$Prov2heptemMCF, alternative =
c("two.sided"), :
  cannot compute exact p-value with zeroes

```

```

> x<-10
> y<-85
> arrows(x,y,x+1,y, length=0.05, angle=90, code=1)
> arrows(x,y,x+1,y, length=0.05, angle=90, code=2)
> text(x+0.5,y-3,"**",pos=3, cex=1.4)
>
> mean(epi$preopHEPTEminusINTEMmcf, na.rm=TRUE)
[1] -1.105263
> sd(epi$preopHEPTEminusINTEMmcf, na.rm=TRUE)
[1] 1.752056
> mean(epi$postopHEPTEminusINTEMmcf, na.rm=TRUE)
[1] -0.15625
> sd(epi$postopHEPTEminusINTEMmcf, na.rm=TRUE)
[1] 6.687057
> #hist(epi$preopHEPTEminusINTEMmcf)
> epi$preopHEPTEminusINTEMmcf
 [1]  0 -2 -3 -2  2 -2  0  1 -1 -4 -4  2 -1 -3 -3  1 -3 -2  1 -4  0  0  0 -1  0
[26]  0  1 -2 -4 -1  0 -1  1 -4 -1 -1 -2  0
> #hist(epi$postopHEPTEminusINTEMmcf)
>
> t.test(epi$preopHEPTEminusINTEMmcf,epi$postopHEPTEminusINTEMmcf,alternative
= c("two.sided"),paired = TRUE)

```

Paired t-test

```

data: epi$preopHEPTEminusINTEMmcf and epi$postopHEPTEminusINTEMmcf
t = -0.55375, df = 31, p-value = 0.5837
alternative hypothesis: true difference in means is not equal to 0
95 percent confidence interval:
 -3.073271  1.760771

```

```
sample estimates:
mean of the differences
      -0.65625
```

```
> wilcox.test(epi$preopHEPTEminusINTEmmcf,epi
$postopHEPTEminusINTEmmcf,alternative = c("two.sided"),paired = TRUE)
```

Wilcoxon signed rank test with continuity correction

```
data: epi$preopHEPTEminusINTEmmcf and epi$postopHEPTEminusINTEmmcf
V = 156.5, p-value = 0.5819
alternative hypothesis: true location shift is not equal to 0
```

Warning messages:

```
1: In wilcox.test.default(epi$preopHEPTEminusINTEmmcf, epi
$postopHEPTEminusINTEmmcf, :
  cannot compute exact p-value with ties
2: In wilcox.test.default(epi$preopHEPTEminusINTEmmcf, epi
$postopHEPTEminusINTEmmcf, :
  cannot compute exact p-value with zeroes
```

```
>
```

```
>
```

```
>
```

```
> #CT
```

```
> boxplot(epi$Prov1extemCT,epi$Prov2extemCT,-1000, epi$Prov1intemCT,epi
$Prov2intemCT,-1000, epi$Prov1heptemCT,epi$Prov2heptemCT,-1000,epi
$preopINTEminusHEPTEmct,epi$postopINTEminusHEPTEmct, horizontal=FALSE,
na.rm=TRUE, axes=TRUE, main="Pre- and postoperative ROTEM CT
Values",cex.main=1.65,cex.axis=1.5,cex.lab=1.45, ylab="Clotting time (CT) in
s", boxwex=1, col=c(24,0,0,24,0,0,24,0,0,24,0,0,24,0), ylim=c(-102,400),lty=1)
```

Warning messages:

```
1: In is.na(x) : is.na() applied to non-(list or vector) of type 'NULL'
2: In is.na(x) : is.na() applied to non-(list or vector) of type 'NULL'
3: In is.na(x) : is.na() applied to non-(list or vector) of type 'NULL'
4: In is.na(x) : is.na() applied to non-(list or vector) of type 'NULL'
5: In is.na(x) : is.na() applied to non-(list or vector) of type 'NULL'
6: In is.na(x) : is.na() applied to non-(list or vector) of type 'NULL'
```

```
> text(x=1.5,y=380, "EXTEM", pos=3, cex=1.2)
```

```
> text(x=4.5,y=380, "INTEM", pos=3, cex=1.2)
```

```
> text(x=7.5,y=380, "HEPTEM", pos=3, cex=1.2)
```

```
> text(x=10.5,y=380, "INTEM -", pos=3, cex=1.2)
```

```
> text(x=10.5,y=355, "HEPTEM", pos=3, cex=1.2)
```

```
> legend(0.7,-20, c("Preoperative","Postoperative"), cex= 1,fill=c(24,0))
```

```
>
```

```
> legend(4.7,-25,lty=3,lwd=2,c("Reference range"))
```

```
> arrows(0.4,38,,79,code=0,lwd=2,lty=3)
```

```
> arrows(3.4,100,,240,code=0,lwd=2,lty=3)
```

```
> arrows(6.4,100,,240,code=0,lwd=2,lty=3)
```

```
>
```

```
> mean(epi$Prov1extemCT, na.rm=TRUE)
```

```
[1] 47.52632
```

```
> sd(epi$Prov1extemCT, na.rm=TRUE)
```

```
[1] 13.90652
```

```
> mean(epi$Prov2extemCT, na.rm=TRUE)
```

```
[1] 48.12121
```

```
> sd(epi$Prov2extemCT, na.rm=TRUE)
```

```

[1] 12.19825
>
> mean(epi$Prov1intemCT, na.rm=TRUE)
[1] 175.9474
> sd(epi$Prov1intemCT, na.rm=TRUE)
[1] 46.48158
> mean(epi$Prov2intemCT, na.rm=TRUE)
[1] 165.0303
> sd(epi$Prov2intemCT, na.rm=TRUE)
[1] 42.96982
>
> mean(epi$Prov1heptemCT, na.rm=TRUE)
[1] 187.7632
> sd(epi$Prov1heptemCT, na.rm=TRUE)
[1] 49.63675
> mean(epi$Prov2heptemCT, na.rm=TRUE)
[1] 181.7273
> sd(epi$Prov2heptemCT, na.rm=TRUE)
[1] 45.23016
>
> t.test(epi$Prov1extemCT,epi$Prov2extemCT,alternative = c("two.sided"),paired
= TRUE)

```

#### Paired t-test

```

data: epi$Prov1extemCT and epi$Prov2extemCT
t = -0.71131, df = 32, p-value = 0.482
alternative hypothesis: true difference in means is not equal to 0
95 percent confidence interval:
 -7.376024  3.557842
sample estimates:
mean of the differences
      -1.909091

```

```

> wilcox.test(epi$Prov1extemCT,epi$Prov2extemCT,alternative =
c("two.sided"),paired = TRUE)

```

#### Wilcoxon signed rank test with continuity correction

```

data: epi$Prov1extemCT and epi$Prov2extemCT
V = 178.5, p-value = 0.1117
alternative hypothesis: true location shift is not equal to 0

```

#### Warning messages:

```

1: In wilcox.test.default(epi$Prov1extemCT, epi$Prov2extemCT, alternative =
c("two.sided"), :

```

```

cannot compute exact p-value with ties

```

```

2: In wilcox.test.default(epi$Prov1extemCT, epi$Prov2extemCT, alternative =
c("two.sided"), :

```

```

cannot compute exact p-value with zeroes

```

```

> mean(epi$Prov1extemCT, na.rm=TRUE)

```

```

[1] 47.52632

```

```

> sd(epi$Prov1intemCT, na.rm=TRUE)

```

```

[1] 46.48158

```

```

>

```

```

> t.test(epi$Prov1intemCT,epi$Prov2intemCT,alternative = c("two.sided"),paired

```

```
= TRUE)
```

Paired t-test

```
data: epi$Prov1intemCT and epi$Prov2intemCT
t = 1.462, df = 32, p-value = 0.1535
alternative hypothesis: true difference in means is not equal to 0
95 percent confidence interval:
 -6.07791 36.98700
sample estimates:
mean of the differences
      15.45455
```

```
> wilcox.test(epi$Prov1intemCT,epi$Prov2intemCT,alternative =
c("two.sided"),paired = TRUE)
```

Wilcoxon signed rank test with continuity correction

```
data: epi$Prov1intemCT and epi$Prov2intemCT
V = 371.5, p-value = 0.1058
alternative hypothesis: true location shift is not equal to 0
```

Warning message:

```
In wilcox.test.default(epi$Prov1intemCT, epi$Prov2intemCT, alternative =
c("two.sided"), :
```

```
cannot compute exact p-value with ties
```

```
> mean(epi$Prov1extemCT, na.rm=TRUE)
```

```
[1] 47.52632
```

```
>
```

```
> t.test(epi$Prov1heptemCT,epi$Prov2heptemCT,alternative =
c("two.sided"),paired = TRUE)
```

Paired t-test

```
data: epi$Prov1heptemCT and epi$Prov2heptemCT
t = 0.69247, df = 32, p-value = 0.4936
alternative hypothesis: true difference in means is not equal to 0
95 percent confidence interval:
 -17.23871 34.99629
sample estimates:
mean of the differences
      8.878788
```

```
> wilcox.test(epi$Prov1heptemCT,epi$Prov2heptemCT,alternative =
c("two.sided"),paired = TRUE)
```

Wilcoxon signed rank test with continuity correction

```
data: epi$Prov1heptemCT and epi$Prov2heptemCT
V = 334.5, p-value = 0.3391
alternative hypothesis: true location shift is not equal to 0
```

Warning message:

```
In wilcox.test.default(epi$Prov1heptemCT, epi$Prov2heptemCT, alternative =
c("two.sided"), :
```

```
cannot compute exact p-value with ties
```



```

>
>
> t.test(eps$Prov1CT,eps$Prov2fibtemCT,alternative = c("two.sided"),paired =
TRUE)
Error in t.test.default(eps$Prov1CT, eps$Prov2fibtemCT, alternative =
c("two.sided"), :
  not enough 'x' observations
> wilcox.test(eps$Prov1fibtemCT,eps$Prov2fibtemCT,alternative =
c("two.sided"),paired = TRUE)

```

Wilcoxon signed rank test with continuity correction

```

data: eps$Prov1fibtemCT and eps$Prov2fibtemCT
V = 165, p-value = 0.1055
alternative hypothesis: true location shift is not equal to 0

```

Warning messages:

```

1: In wilcox.test.default(eps$Prov1fibtemCT, eps$Prov2fibtemCT, alternative =
c("two.sided"), :
  cannot compute exact p-value with ties
2: In wilcox.test.default(eps$Prov1fibtemCT, eps$Prov2fibtemCT, alternative =
c("two.sided"), :
  cannot compute exact p-value with zeroes

```

```

>
>
>
> t.test(eps$Prov1intemCT,eps$Prov2intemCT,alternative = c("two.sided"),paired
= TRUE)

```

Paired t-test

```

data: eps$Prov1intemCT and eps$Prov2intemCT
t = 1.462, df = 32, p-value = 0.1535
alternative hypothesis: true difference in means is not equal to 0
95 percent confidence interval:
 -6.07791 36.98700
sample estimates:
mean of the differences
      15.45455

```

```

> wilcox.test(eps$Prov1intemCT,eps$Prov2intemCT,alternative =
c("two.sided"),paired = TRUE)

```

Wilcoxon signed rank test with continuity correction

```

data: eps$Prov1intemCT and eps$Prov2intemCT
V = 371.5, p-value = 0.1058
alternative hypothesis: true location shift is not equal to 0

```

Warning message:

```

In wilcox.test.default(eps$Prov1intemCT, eps$Prov2intemCT, alternative =
c("two.sided"), :
  cannot compute exact p-value with ties

```

```

>
>
>

```

```
> t.test(epi$Prov1heptemCT,epi$Prov2heptemCT,alternative =
c("two.sided"),paired = TRUE)
```

Paired t-test

```
data: epi$Prov1heptemCT and epi$Prov2heptemCT
t = 0.69247, df = 32, p-value = 0.4936
alternative hypothesis: true difference in means is not equal to 0
95 percent confidence interval:
 -17.23871  34.99629
sample estimates:
mean of the differences
      8.878788
```

```
> wilcox.test(epi$Prov1heptemCT,epi$Prov2heptemCT,alternative =
c("two.sided"),paired = TRUE)
```

Wilcoxon signed rank test with continuity correction

```
data: epi$Prov1heptemCT and epi$Prov2heptemCT
V = 334.5, p-value = 0.3391
alternative hypothesis: true location shift is not equal to 0
```

Warning message:

```
In wilcox.test.default(epi$Prov1heptemCT, epi$Prov2heptemCT, alternative =
c("two.sided"), :
cannot compute exact p-value with ties
```

```
>
```

```
>
```

```
> t.test(epi$preopINTEMminusHEPTEmct,epi$postopINTEMminusHEPTEmct,alternative =
c("two.sided"),paired = TRUE)
```

```
Error in t.test.default(epi$preopINTEMminusHEPTEmct, epi
$postopINTEMminusHEPTEmct, :
'y' is missing for paired test
```

```
> wilcox.test(epi$preopINTEMminusHEPTEmct,epi
$postopINTEMminusHEPTEmct,alternative = c("two.sided"),paired = TRUE)
```

```
Error in wilcox.test.default(epi$preopINTEMminusHEPTEmct, epi
$postopINTEMminusHEPTEmct, :
'x' must be numeric
```

```
>
```

```
>
```

```
>
```

```
> #MultiplateADP
```

```
> boxplot(epi$Prov1multiplateADP,epi$Prov2multiplateADP,-100, epi
$Prov1multiplateCOL,epi$Prov2multiplateCOL,-100, epi$Prov1multiplateTRAP,epi
$Prov2multiplateTRAP,-100, epi$Prov1multiplateASPI,epi$Prov2multiplateASPI,
horizontal=FALSE, na.rm=TRUE, axes=TRUE, main="Pre- and postoperative
Multiplate Values",cex.main=1.65, ylim=c(-20,180),cex.axis=1.5,cex.lab=1.45,
ylab="Area Under Curve (AUC)", boxwex=1,
col=c(24,0,0,24,0,0,24,0,0,24,0,0,24,0), lty=1)
```

```
> text(x=1.5,y=173, "ADP", pos=3, cex=1.2)
```

```
> text(x=4.5,y=173, "COL", pos=3, cex=1.2)
```

```
> text(x=7.5,y=173, "TRAP", pos=3, cex=1.2)
```

```
> text(x=10.5,y=173, "ASPI", pos=3, cex=1.2)
```

```
>
```

```
> legend(0.7,0, c("Preoperative","Postoperative"), cex= 1,fill=c(24,0))
```

```

> legend(5.7,0,lty=3,lwd=2,c("Reference range"))
> arrows(0.4,57,,113,code=0,lwd=2,lty=3)
> arrows(3.4,72,,125,code=0,lwd=2,lty=3)
> arrows(6.4,84,,128,code=0,lwd=2,lty=3)
> arrows(9.4,71,,115,code=0,lwd=2,lty=3)
>
> t.test(emi$Prov1multiplateADP,emi$Prov2multiplateADP,alternative =
c("two.sided"),paired = TRUE)

```

Paired t-test

```

data: emi$Prov1multiplateADP and emi$Prov2multiplateADP
t = -1.5086, df = 32, p-value = 0.1412
alternative hypothesis: true difference in means is not equal to 0
95 percent confidence interval:
 -23.146033  3.449064
sample estimates:
mean of the differences
 -9.848485

```

```

> wilcox.test(emi$Prov1multiplateADP,emi$Prov2multiplateADP,alternative =
c("two.sided"),paired = TRUE)

```

Wilcoxon signed rank test with continuity correction

```

data: emi$Prov1multiplateADP and emi$Prov2multiplateADP
V = 200, p-value = 0.235
alternative hypothesis: true location shift is not equal to 0

```

Warning messages:

```

1: In wilcox.test.default(emi$Prov1multiplateADP, emi$Prov2multiplateADP, :
cannot compute exact p-value with ties
2: In wilcox.test.default(emi$Prov1multiplateADP, emi$Prov2multiplateADP, :
cannot compute exact p-value with zeroes

```

```

>
> t.test(emi$Prov1multiplateCOL,emi$Prov2multiplateCOL,alternative =
c("two.sided"),paired = TRUE)

```

Paired t-test

```

data: emi$Prov1multiplateCOL and emi$Prov2multiplateCOL
t = -5.1807, df = 32, p-value = 1.175e-05
alternative hypothesis: true difference in means is not equal to 0
95 percent confidence interval:
 -45.97478 -20.02522
sample estimates:
mean of the differences
 -33

```

```

> wilcox.test(emi$Prov1multiplateCOL,emi$Prov2multiplateCOL,alternative =
c("two.sided"),paired = TRUE)

```

Wilcoxon signed rank test with continuity correction

```

data: emi$Prov1multiplateCOL and emi$Prov2multiplateCOL
V = 37.5, p-value = 2.372e-05

```

alternative hypothesis: true location shift is not equal to 0

Warning messages:

1: In wilcox.test.default(emi\$Prov1multiplateCOL, emi\$Prov2multiplateCOL, :  
cannot compute exact p-value with ties

2: In wilcox.test.default(emi\$Prov1multiplateCOL, emi\$Prov2multiplateCOL, :  
cannot compute exact p-value with zeroes

>

> x<-4

> y<-170

> arrows(x,y,x+1,y, length=0.05, angle=90, code=1)

> arrows(x,y,x+1,y, length=0.05, angle=90, code=2)

> text(x+0.5,y-6,"\*\*",pos=3, cex=1.4)

>

> t.test(emi\$Prov1multiplateTRAP,emi\$Prov2multiplateTRAP,alternative =  
c("two.sided"),paired = TRUE)

Paired t-test

data: emi\$Prov1multiplateTRAP and emi\$Prov2multiplateTRAP

t = -1.0839, df = 32, p-value = 0.2865

alternative hypothesis: true difference in means is not equal to 0

95 percent confidence interval:

-24.430100 7.460403

sample estimates:

mean of the differences

-8.484848

> wilcox.test(emi\$Prov1multiplateTRAP,emi\$Prov2multiplateTRAP,alternative =  
c("two.sided"),paired = TRUE)

Wilcoxon signed rank test with continuity correction

data: emi\$Prov1multiplateTRAP and emi\$Prov2multiplateTRAP

V = 231.5, p-value = 0.3861

alternative hypothesis: true location shift is not equal to 0

Warning message:

In wilcox.test.default(emi\$Prov1multiplateTRAP, emi\$Prov2multiplateTRAP, :  
cannot compute exact p-value with ties

>

> t.test(emi\$Prov1multiplateASPI,emi\$Prov2multiplateASPI,alternative =  
c("two.sided"),paired = TRUE)

Paired t-test

data: emi\$Prov1multiplateASPI and emi\$Prov2multiplateASPI

t = -3.1759, df = 32, p-value = 0.003298

alternative hypothesis: true difference in means is not equal to 0

95 percent confidence interval:

-37.801125 -8.259481

sample estimates:

mean of the differences

-23.0303

> wilcox.test(emi\$Prov1multiplateASPI,emi\$Prov2multiplateASPI,alternative =

```
c("two.sided"),paired = TRUE)
```

Wilcoxon signed rank test with continuity correction

data: epi\$Prov1multiplateASPI and epi\$Prov2multiplateASPI

V = 124.5, p-value = 0.005454

alternative hypothesis: true location shift is not equal to 0

Warning message:

```
In wilcox.test.default(epi$Prov1multiplateASPI, epi$Prov2multiplateASPI, :  
cannot compute exact p-value with ties
```

```
> x<-10
```

```
> y<-170
```

```
> arrows(x,y,x+1,y, length=0.05, angle=90, code=1)
```

```
> arrows(x,y,x+1,y, length=0.05, angle=90, code=2)
```

```
> text(x+0.5,y-6,"**",pos=3, cex=1.4)
```

```
>
```

```
> mean(epi$Prov1multiplateADP, na.rm=TRUE)
```

```
[1] 68.10526
```

```
> sd(epi$Prov1multiplateADP, na.rm=TRUE)
```

```
[1] 21.04023
```

```
> mean(epi$Prov2multiplateADP, na.rm=TRUE)
```

```
[1] 77.39394
```

```
> sd(epi$Prov2multiplateADP, na.rm=TRUE)
```

```
[1] 27.00456
```

```
>
```

```
> mean(epi$Prov1multiplateCOL, na.rm=TRUE)
```

```
[1] 62.26316
```

```
> sd(epi$Prov1multiplateCOL, na.rm=TRUE)
```

```
[1] 21.94918
```

```
> mean(epi$Prov2multiplateCOL, na.rm=TRUE)
```

```
[1] 94.30303
```

```
> sd(epi$Prov2multiplateCOL, na.rm=TRUE)
```

```
[1] 30.3526
```

```
>
```

```
> mean(epi$Prov1multiplateTRAP, na.rm=TRUE)
```

```
[1] 102.8684
```

```
> sd(epi$Prov1multiplateTRAP, na.rm=TRUE)
```

```
[1] 31.77979
```

```
> mean(epi$Prov2multiplateTRAP, na.rm=TRUE)
```

```
[1] 108.9697
```

```
> sd(epi$Prov2multiplateTRAP, na.rm=TRUE)
```

```
[1] 32.84194
```

```
>
```

```
> mean(epi$Prov1multiplateASPI, na.rm=TRUE)
```

```
[1] 72.10526
```

```
> sd(epi$Prov1multiplateASPI, na.rm=TRUE)
```

```
[1] 23.98174
```

```
> mean(epi$Prov2multiplateASPI, na.rm=TRUE)
```

```
[1] 94.09091
```

```
> sd(epi$Prov2multiplateASPI, na.rm=TRUE)
```

```
[1] 38.98186
```

```
>
```

```
> hist(epi$Prov1multiplateADP)
```

```
> hist(epi$Prov1multiplateCOL)
```

```
> hist(epi$Prov1multiplateTRAP)
```

```
> hist(epi$Prov1multiplateASPI)
>
> t.test(epi$Prov1multiplateTRAP,epi$Prov2multiplateTRAP,alternative =
c("two.sided"),paired = TRUE)
```

Paired t-test

```
data: epi$Prov1multiplateTRAP and epi$Prov2multiplateTRAP
t = -1.0839, df = 32, p-value = 0.2865
alternative hypothesis: true difference in means is not equal to 0
95 percent confidence interval:
 -24.430100  7.460403
sample estimates:
mean of the differences
      -8.484848
```

```
> wilcox.test(epi$Prov1multiplateTRAP,epi$Prov2multiplateTRAP,alternative =
c("two.sided"),paired = TRUE)
```

Wilcoxon signed rank test with continuity correction

```
data: epi$Prov1multiplateTRAP and epi$Prov2multiplateTRAP
V = 231.5, p-value = 0.3861
alternative hypothesis: true location shift is not equal to 0
```

Warning message:

```
In wilcox.test.default(epi$Prov1multiplateTRAP, epi$Prov2multiplateTRAP, :
cannot compute exact p-value with ties
```

```
>
> t.test(epi$Prov1multiplateASPI,epi$Prov2multiplateASPI,alternative =
c("two.sided"),paired = TRUE)
```

Paired t-test

```
data: epi$Prov1multiplateASPI and epi$Prov2multiplateASPI
t = -3.1759, df = 32, p-value = 0.003298
alternative hypothesis: true difference in means is not equal to 0
95 percent confidence interval:
 -37.801125  -8.259481
sample estimates:
mean of the differences
      -23.0303
```

```
> wilcox.test(epi$Prov1multiplateASPI,epi$Prov2multiplateASPI,alternative =
c("two.sided"),paired = TRUE)
```

Wilcoxon signed rank test with continuity correction

```
data: epi$Prov1multiplateASPI and epi$Prov2multiplateASPI
V = 124.5, p-value = 0.005454
alternative hypothesis: true location shift is not equal to 0
```

Warning message:

```
In wilcox.test.default(epi$Prov1multiplateASPI, epi$Prov2multiplateASPI, :
cannot compute exact p-value with ties
```

```
> x<-10
```

```

> y<-170
> arrows(x,y,x+1,y, length=0.05, angle=90, code=1)
> arrows(x,y,x+1,y, length=0.05, angle=90, code=2)
> text(x+0.5,y-6,"**",pos=3, cex=1.4)
>
> mean(epi$Prov1multiplateADP, na.rm=TRUE)
[1] 68.10526
> sd(epi$Prov1multiplateADP, na.rm=TRUE)
[1] 21.04023
> mean(epi$Prov2multiplateADP, na.rm=TRUE)
[1] 77.39394
> sd(epi$Prov2multiplateADP, na.rm=TRUE)
[1] 27.00456
>
> mean(epi$Prov1multiplateCOL, na.rm=TRUE)
[1] 62.26316
> sd(epi$Prov1multiplateCOL, na.rm=TRUE)
[1] 21.94918
> mean(epi$Prov2multiplateCOL, na.rm=TRUE)
[1] 94.30303
> sd(epi$Prov2multiplateCOL, na.rm=TRUE)
[1] 30.3526
>
> mean(epi$Prov1multiplateTRAP, na.rm=TRUE)
[1] 102.8684
> sd(epi$Prov1multiplateTRAP, na.rm=TRUE)
[1] 31.77979
> mean(epi$Prov2multiplateTRAP, na.rm=TRUE)
[1] 108.9697
> sd(epi$Prov2multiplateTRAP, na.rm=TRUE)
[1] 32.84194
>
> mean(epi$Prov1multiplateASPI, na.rm=TRUE)
[1] 72.10526
> sd(epi$Prov1multiplateASPI, na.rm=TRUE)
[1] 23.98174
> mean(epi$Prov2multiplateASPI, na.rm=TRUE)
[1] 94.09091
> sd(epi$Prov2multiplateASPI, na.rm=TRUE)
[1] 38.98186
>
> hist(epi$Prov1multiplateADP)
> hist(epi$Prov1multiplateCOL)
> hist(epi$Prov1multiplateTRAP)
> hist(epi$Prov1multiplateASPI)
>
>
>
> #rutinPK
> dev.new(width=3)
> boxplot(epi$Prov1rutinPK,epi$Prov2rutinPK, horizontal=FALSE, na.rm=TRUE,
axes=TRUE, main="PT-INR",cex.main=1.65,
ylim=c(0.8,1.8),cex.axis=1.5,cex.lab=1.45, xlim=c(0,2.5),ylab="PT-INR",
boxwex=1, col=c(24,0), lty=1)
> #legend(0.1,1.8, c("Preoperative","Postoperative"), cex= 1,fill=c(24,0))

```

```
> arrows(0.25,0.9,,1.2,code=0,lwd=2,lty=3)
>
> t.test(emi$Prov1rutinPK,emi$Prov2rutinPK,alternative = c("two.sided"),paired
= TRUE)
```

Paired t-test

```
data: emi$Prov1rutinPK and emi$Prov2rutinPK
t = -5.6176, df = 30, p-value = 4.077e-06
alternative hypothesis: true difference in means is not equal to 0
95 percent confidence interval:
 -0.20673186 -0.09649394
sample estimates:
mean of the differences
 -0.1516129
```

```
> wilcox.test(emi$Prov1rutinPK,emi$Prov2rutinPK,alternative =
c("two.sided"),paired = TRUE)
```

Wilcoxon signed rank test with continuity correction

```
data: emi$Prov1rutinPK and emi$Prov2rutinPK
V = 0, p-value = 3.92e-05
alternative hypothesis: true location shift is not equal to 0
```

Warning messages:

```
1: In wilcox.test.default(emi$Prov1rutinPK, emi$Prov2rutinPK, alternative =
c("two.sided"), :
cannot compute exact p-value with ties
```

```
2: In wilcox.test.default(emi$Prov1rutinPK, emi$Prov2rutinPK, alternative =
c("two.sided"), :
cannot compute exact p-value with zeroes
```

```
> x<-1
> y<-0.83
> arrows(x,y,x+1,y, length=0.05, angle=90, code=1)
> arrows(x,y,x+1,y, length=0.05, angle=90, code=2)
> text(x+0.5,0.8,"**",pos=3, cex=1.4)
>
>
>
> #rutinAPTT
> dev.new(width=3)
> boxplot(emi$Prov1rutinAPTT,emi$Prov2rutinAPTT, horizontal=FALSE, na.rm=TRUE,
axes=TRUE, main="aPTT",cex.main=1.65, ylim=c(19,max(emi$Prov1rutinAPTT,emi
$Prov2rutinAPTT,na.rm=TRUE)),cex.axis=1.5,cex.lab=1.45,
xlim=c(0,2.5),ylab="aPTT (s)", boxwex=1, col=c(24,0), lty=1)
> arrows(0.25,26,,33,code=0,lwd=2,lty=3)
>
> t.test(emi$Prov1rutinAPTT,emi$Prov2rutinAPTT,alternative =
c("two.sided"),paired = TRUE)
```

Paired t-test

```
data: emi$Prov1rutinAPTT and emi$Prov2rutinAPTT
t = -2.8253, df = 29, p-value = 0.008461
alternative hypothesis: true difference in means is not equal to 0
```



95 percent confidence interval:  
-4.3671924 -0.6994742  
sample estimates:  
mean of the differences  
-2.533333

```
> wilcox.test(epi$Prov1rutinAPTT,epi$Prov2rutinAPTT,alternative =  
c("two.sided"),paired = TRUE)
```

Wilcoxon signed rank test with continuity correction

data: epi\$Prov1rutinAPTT and epi\$Prov2rutinAPTT  
V = 89.5, p-value = 0.005653  
alternative hypothesis: true location shift is not equal to 0

Warning messages:

```
1: In wilcox.test.default(epi$Prov1rutinAPTT, epi$Prov2rutinAPTT, alternative =  
c("two.sided"), :  
cannot compute exact p-value with ties  
2: In wilcox.test.default(epi$Prov1rutinAPTT, epi$Prov2rutinAPTT, alternative =  
c("two.sided"), :  
cannot compute exact p-value with zeroes
```

```
> x<-1  
> y<-20.5  
> arrows(x,y,x+1,y, length=0.05, angle=90, code=1)  
> arrows(x,y,x+1,y, length=0.05, angle=90, code=2)  
> text(x+0.5,y-0.7,"**",pos=3, cex=1.4)  
>  
> #rutinCRP  
> dev.new(width=3)  
> boxplot(epi$Prov1rutinCRP,epi$Prov2rutinCRP, horizontal=FALSE, na.rm=TRUE,  
axes=TRUE, main="CRP",cex.main=1.65,cex.axis=1.5,cex.lab=1.45,  
xlim=c(0,2.5),ylab="CRP (mg/L)", boxwex=1, col=c(24,0), lty=1)  
> arrows(0.25,0,,3,code=0,lwd=2,lty=3)  
> t.test(epi$Prov1rutinCRP,epi$Prov2rutinCRP,alternative =  
c("two.sided"),paired = TRUE)
```

Paired t-test

data: epi\$Prov1rutinCRP and epi\$Prov2rutinCRP  
t = -7.5742, df = 29, p-value = 2.38e-08  
alternative hypothesis: true difference in means is not equal to 0  
95 percent confidence interval:  
-107.688 -61.896  
sample estimates:  
mean of the differences  
-84.792

```
> wilcox.test(epi$Prov1rutinCRP,epi$Prov2rutinCRP,alternative =  
c("two.sided"),paired = TRUE)
```

Wilcoxon signed rank test

data: epi\$Prov1rutinCRP and epi\$Prov2rutinCRP  
V = 0, p-value = 1.863e-09  
alternative hypothesis: true location shift is not equal to 0

```

> x<-1
> y<-250
> arrows(x,y,x+1,y, length=0.05, angle=90, code=1)
> arrows(x,y,x+1,y, length=0.05, angle=90, code=2)
> text(x+0.5,y-1,"**",pos=3, cex=1.4)
>
>
>
> #rutinTPK
> dev.new(width=3)
> boxplot(emi$Prov1rutinTPK,emi$Prov2rutinTPK, horizontal=FALSE, na.rm=TRUE,
axes=TRUE, main="Plc",cex.main=1.65, ylim=c(-50,max(emi$Prov1rutinTPK,emi
$Prov2rutinTPK,na.rm=TRUE)),cex.axis=1.5,cex.lab=1.45, xlim=c(0,2.5),ylab="Plc
(millions/mL)", boxwex=1, col=c(24,0), lty=1)
> arrows(0.25,145,,387,code=0,lwd=2,lty=3)
>
> t.test(emi$Prov1rutinTPK,emi$Prov2rutinTPK,alternative =
c("two.sided"),paired = TRUE)

```

#### Paired t-test

```

data: emi$Prov1rutinTPK and emi$Prov2rutinTPK
t = -3.0816, df = 30, p-value = 0.004385
alternative hypothesis: true difference in means is not equal to 0
95 percent confidence interval:
 -122.2372 -24.7951
sample estimates:
mean of the differences
      -73.51613

```

```

> wilcox.test(emi$Prov1rutinTPK,emi$Prov2rutinTPK,alternative =
c("two.sided"),paired = TRUE)

```

#### Wilcoxon signed rank test with continuity correction

```

data: emi$Prov1rutinTPK and emi$Prov2rutinTPK
V = 80.5, p-value = 0.001065
alternative hypothesis: true location shift is not equal to 0

```

#### Warning message:

```

In wilcox.test.default(emi$Prov1rutinTPK, emi$Prov2rutinTPK, alternative =
c("two.sided"), :
cannot compute exact p-value with ties

```

```

> x<-1
> y<--40
> arrows(x,y,x+1,y, length=0.05, angle=90, code=1)
> arrows(x,y,x+1,y, length=0.05, angle=90, code=2)
> text(x+0.5,y-30,"**",pos=3, cex=1.4)
>
> #Boxplot PIVKA
> hist(emi$PIVKAMpreop)
> hist(emi$PIVKAMpostop)
> dev.new(width=3)
> boxplot(emi$PIVKAMpreop,emi$PIVKAMpostop, horizontal=FALSE, na.rm=TRUE,
axes=TRUE, main="PIVKA",cex.main=1.65, ylim=c(0,89),cex.axis=1.5,cex.lab=1.45,

```

```
xlim=c(0,2.5),ylab="PIVKA (mg/L)", boxwex=1, col=c(24,0), lty=1)
> arrows(0.25,0,,0.2,code=0,lwd=2,lty=3)
>
> t.test(epi$PIVKAMpreop,epi$PIVKAMpostop,alternative = c("two.sided"),paired = TRUE)
```

#### Paired t-test

```
data: epi$PIVKAMpreop and epi$PIVKAMpostop
t = -1.8204, df = 30, p-value = 0.07868
alternative hypothesis: true difference in means is not equal to 0
95 percent confidence interval:
 -49.134869  2.821966
sample estimates:
mean of the differences
      -23.15645
```

```
> wilcox.test(epi$PIVKAMpreop,epi$PIVKAMpostop,alternative = c("two.sided"),paired = TRUE)
```

#### Wilcoxon signed rank test

```
data: epi$PIVKAMpreop and epi$PIVKAMpostop
V = 25, p-value = 8.419e-07
alternative hypothesis: true location shift is not equal to 0
```

```
> x<-1
> y<-70
> arrows(x,y,x+1,y, length=0.05, angle=90, code=1)
> arrows(x,y,x+1,y, length=0.05, angle=90, code=2)
> text(x+0.5,y-3,"**",pos=3, cex=1.4)
> legend(0.1,90, c("Preoperative","Postoperative"), cex= 1,fill=c(24,0))
>
> #Boxplot DDimer
> mean(epi$DDpreop, na.rm=TRUE)
[1] 0.2471081
> sd(epi$DDpreop, na.rm=TRUE)
[1] 0.224601
> mean(epi$DDpostop, na.rm=TRUE)
[1] 1.733645
> sd(epi$DDpostop, na.rm=TRUE)
[1] 1.04771
>
> hist(epi$DDpreop)
> hist(epi$DDpostop)
> dev.new(width=3)
> boxplot(epi$DDpreop,epi$DDpostop, horizontal=FALSE, na.rm=TRUE, axes=TRUE,
main="D-dimer",cex.main=1.65, ylim=c(0,6),cex.axis=1.5,cex.lab=1.45,
xlim=c(0,2.5),ylab="D-Dimer (mg/L)", boxwex=1, col=c(24,0), lty=1,plot=TRUE)
> arrows(0.25,0,,0.25,code=0,lwd=2,lty=3)
>
> t.test(epi$DDpreop,epi$DDpostop,alternative = c("two.sided"),paired = TRUE)
```

#### Paired t-test

```
data: epi$DDpreop and epi$DDpostop
```

```

t = -8.1538, df = 30, p-value = 4.213e-09
alternative hypothesis: true difference in means is not equal to 0
95 percent confidence interval:
-1.841091 -1.103554
sample estimates:
mean of the differences
-1.472323

```

```

> wilcox.test(eps$DDpreop,eps$DDpostop,alternative = c("two.sided"),paired = TRUE)

```

Wilcoxon signed rank test

```

data: eps$DDpreop and eps$DDpostop
V = 0, p-value = 9.313e-10
alternative hypothesis: true location shift is not equal to 0

```

```

> x<-1
> y<-5
> arrows(x,y,x+1,y, length=0.05, angle=90, code=1)
> arrows(x,y,x+1,y, length=0.05, angle=90, code=2)
> text(x+0.5,y-0.2,"**",pos=3, cex=1.4)
> #legend(0.1,90, c("Preoperative","Postoperative"), cex= 1,fill=c(24,0))
>
>
>
>
> ###Before and after diagrams
> #Before and after diagrams for EXTEM-MCF
> preop<-eps$Prov1extemMCF
> postop<-eps$Prov2extemMCF
> preopdata<-t(matrix(preop))
> postopdata<-t(matrix(postop))
> withdrawaltime<-t(matrix(eps$withdrawaltime))
> meanwithdrawaltime<-mean(eps$withdrawaltime, na.rm=TRUE)
> y<-rbind(preop, postop)
> beforeandafterdata<-rbind(withdrawaltime, preopdata, postopdata)
> beforeandafterdata

```

|      | [,1]      | [,2]      | [,3]      | [,4]      | [,5]      | [,6]      | [,7]      | [,8]      |
|------|-----------|-----------|-----------|-----------|-----------|-----------|-----------|-----------|
| [1,] | 11.13194  | 6.118056  | 8.145833  | 3.107639  | 3.1       | 10.07292  | 7.104167  | 6.100694  |
| [2,] | 56.000000 | 63.000000 | 73.000000 | 75.000000 | 66.0      | 67.000000 | 42.000000 | 63.000000 |
| [3,] | 71.000000 | 76.000000 | 74.000000 | 75.000000 | 77.0      | 73.000000 | 73.000000 | 73.000000 |
|      | [,9]      | [,10]     | [,11]     | [,12]     | [,13]     | [,14]     | [,15]     |           |
| [1,] | 2.201389  | 5.145833  | 5.069444  | 14.09722  | 5.131944  | 6.180556  | NA        |           |
| [2,] | 75.000000 | 61.000000 | 63.000000 | 57.000000 | 65.000000 | 69.000000 | 55        |           |
| [3,] | 75.000000 | 68.000000 | 77.000000 | 74.000000 | 66.000000 | 70.000000 | NA        |           |
|      | [,16]     | [,17]     | [,18]     | [,19]     | [,20]     | [,21]     | [,22]     |           |
| [1,] | 2.121528  | 5.194444  | 15.15278  | 5.909722  | NA        | 5.111111  | 4.958333  |           |
| [2,] | 47.000000 | 59.000000 | 61.000000 | 54.000000 | 64        | 60.000000 | 64.000000 |           |
| [3,] | 63.000000 | 69.000000 | 80.000000 | 68.000000 | NA        | 71.000000 | 64.000000 |           |
|      | [,23]     | [,24]     | [,25]     | [,26]     | [,27]     | [,28]     | [,29]     | [,30]     |
| [1,] | 5.145833  | 2.097222  | 2.180556  | NA        | 5.059028  | 3.138889  | NA        | NA        |
| [2,] | 69.000000 | 58.000000 | 66.000000 | 74        | 79.000000 | 58.000000 | 67        | 74        |
| [3,] | 72.000000 | 65.000000 | 63.000000 | NA        | 60.000000 | 54.000000 | NA        | NA        |
|      | [,31]     | [,32]     | [,33]     | [,34]     | [,35]     | [,36]     | [,37]     |           |
| [1,] | 11.17361  | 6.222222  | 6.180556  | 7.104167  | 6.291667  | 5.027778  | 7.076389  |           |

```

[2,] 59.000000 67.000000 61.000000 62.000000 71.000000 63.000000 72.000000
[3,] 80.000000 76.000000 77.000000 75.000000 77.000000 73.000000 79.000000
      [,38]
[1,] 6.097222
[2,] 75.000000
[3,] 77.000000
> ylimits<-c(0.9*(min(preop,postop,na.rm=TRUE)),max(preop,postop, na.rm=TRUE))
> xlimits<-c(0,max(epi$withdrawaltime, na.rm=TRUE))
> xlabel<-"Days after surgery"
> plot(c(0,beforeandafterdata[1,1]),c(beforeandafterdata[2,1],
beforeandafterdata[3,1]),
type="l",col="black",xlim=xlimits,ylim=ylimits,ann=TRUE,axes=TRUE,xlab=xlabel,
main="Individual pre- and postoperative ROTEM-EXTEM-MCF",ylab="Maximum clot
firmness (mm)", cex.main=1.3, cex.lab=1.4,lwd=1)
> for (x in 2:38) {lines(c(0,beforeandafterdata[1,x]),
c(beforeandafterdata[2,x], beforeandafterdata[3,x]), type="l", col="black",
lwd=1)}
>
> #normal range - enter manually!
> lines(c(-.4,-.4), c(50,72), type="l", lwd=6, lty=3)
>
> #Average pre and postoperative values at t=0 and t=mean withdrawal time
> preopmean<-mean(epi$Prov1extemMCF, na.rm=TRUE)
> postopmean<-mean(epi$Prov2extemMCF, na.rm=TRUE)
> lines(c(0, meanwithdrawaltime), c(preopmean, postopmean), type="l", lwd=6,
lty=4)
>
> #Significance value for pre- to postop change - see t.test or Wilcoxon's.
> text(8,78,"P<0.01", cex=2)
>
>
>
> #Before and after diagrams for EXTEM-CT
> preop<-epi$Prov1extemCT
> postop<-epi$Prov2extemCT
> preopdata<-t(matrix(preop))
> postopdata<-t(matrix(postop))
> withdrawaltime<-t(matrix(epi$withdrawaltime))
> meanwithdrawaltime<-mean(epi$withdrawaltime, na.rm=TRUE)
> y<-rbind(preop, postop)
> beforeandafterdata<-rbind(withdrawaltime, preopdata, postopdata)
> beforeandafterdata
      [,1]      [,2]      [,3]      [,4] [,5]      [,6]      [,7]      [,8]
[1,] 11.13194 6.118056 8.145833 3.107639 3.1 10.07292 7.104167 6.100694
[2,] 46.000000 46.000000 44.000000 51.000000 47.0 41.000000 108.000000 25.000000
[3,] 23.000000 43.000000 40.000000 43.000000 37.0 40.000000 51.000000 42.000000
      [,9]      [,10]      [,11]      [,12]      [,13]      [,14] [,15]
[1,] 2.201389 5.145833 5.069444 14.09722 5.131944 6.180556 NA
[2,] 36.000000 33.000000 49.000000 32.00000 42.000000 44.000000 36
[3,] 38.000000 43.000000 31.000000 44.00000 42.000000 42.000000 NA
      [,16]      [,17]      [,18]      [,19] [,20]      [,21]      [,22]
[1,] 2.121528 5.194444 15.15278 5.909722 NA 5.111111 4.958333
[2,] 45.000000 38.000000 41.00000 44.000000 44 42.000000 38.000000
[3,] 57.000000 42.000000 47.00000 41.000000 NA 41.000000 48.000000
      [,23]      [,24]      [,25] [,26]      [,27]      [,28] [,29] [,30]
[1,] 5.145833 2.097222 2.180556 NA 5.059028 3.138889 NA NA

```

```

[2,] 52.000000 52.000000 43.000000    70 57.000000 54.000000    68    63
[3,] 59.000000 44.000000 51.000000    NA 61.000000 63.000000    NA    NA
      [,31]    [,32]    [,33]    [,34]    [,35]    [,36]    [,37]
[1,] 11.17361  6.222222  6.180556  7.104167  6.291667  5.027778  7.076389
[2,] 40.000000 39.000000 47.000000 42.000000 41.000000 47.000000 56.000000
[3,] 46.000000 53.000000 44.000000 48.000000 80.000000 55.000000 72.000000
      [,38]
[1,]  6.097222
[2,] 63.000000
[3,] 77.000000
> ylimits<-c(0.9*(min(preop,postop,na.rm=TRUE)),max(preop,postop, na.rm=TRUE))
> xlimits<-c(0,max(epi$withdrawaltime, na.rm=TRUE))
> xlabel<-"Days after surgery"
> plot(c(0,beforeandafterdata[1,1]),c(beforeandafterdata[2,1],
beforeandafterdata[3,1]),
type="l",col="black",xlim=xlimits,ylim=ylimits,ann=TRUE,axes=TRUE,xlab=xlabel,
main="Individual pre- and postoperative ROTEM-EXTEM-CT",ylab="Clotting time
(s)", cex.main=1.3, cex.lab=1.4,lwd=1)
> for (x in 2:38) {lines(c(0,beforeandafterdata[1,x]),
c(beforeandafterdata[2,x], beforeandafterdata[3,x]), type="l", col="black",
lwd=1)}
>
> #normal range - enter manually!
> lines(c(-.4,-.4), c(38,79), type="l", lwd=6, lty=3)
>
> #Average pre and postoperative values at t=0 and t=mean withdrawal time
> preopmean<-mean(epi$Prov1extemCT, na.rm=TRUE)
> postopmean<-mean(epi$Prov2extemCT, na.rm=TRUE)
> lines(c(0, meanwithdrawaltime), c(preopmean, postopmean), type="l", lwd=6,
lty=4)
>
> #Significance value for pre- to postop change - see t.test or Wilcoxon's.
> text(8,60,"N/S", cex=2)
>
>
> #Before and after diagrams for INTEM-MCF
> preop<-epi$Prov1intemMCF
> postop<-epi$Prov2intemMCF
> preopdata<-t(matrix(preop))
> postopdata<-t(matrix(postop))
> withdrawaltime<-t(matrix(epi$withdrawaltime))
> meanwithdrawaltime<-mean(epi$withdrawaltime, na.rm=TRUE)
> y<-rbind(preop, postop)
> beforeandafterdata<-rbind(withdrawaltime, preopdata, postopdata)
> beforeandafterdata
      [,1]    [,2]    [,3]    [,4] [,5]    [,6]    [,7]    [,8]
[1,] 11.13194  6.118056  8.145833  3.107639  3.1 10.07292  7.104167  6.100694
[2,] 60.000000 61.000000 75.000000 77.000000 62.0 65.000000 56.000000 61.000000
[3,] 74.000000 75.000000 79.000000 74.000000 69.0 77.000000 73.000000 73.000000
      [,9]    [,10]    [,11]    [,12]    [,13]    [,14] [,15]
[1,]  2.201389  5.145833  5.069444 14.09722  5.131944  6.180556    NA
[2,] 74.000000 61.000000 63.000000 59.00000 64.000000 71.000000    56
[3,] 73.000000 69.000000 73.000000 76.00000 64.000000 68.000000    NA
      [,16]    [,17]    [,18]    [,19] [,20]    [,21]    [,22]
[1,]  2.121528  5.194444 15.15278  5.909722    NA  5.111111  4.958333
[2,] 60.000000 57.000000 61.00000 54.00000    65 60.000000 63.000000

```

```

[3,] 61.000000 68.000000 77.000000 69.000000 NA 71.000000 71.000000
      [,23]      [,24]      [,25] [,26]      [,27]      [,28] [,29] [,30]
[1,] 5.145833 2.097222 2.180556 NA 5.059028 3.138889 NA NA
[2,] 68.000000 59.000000 62.000000 70 58.000000 57.000000 64 69
[3,] 71.000000 64.000000 62.000000 NA 56.000000 48.000000 NA NA
      [,31]      [,32]      [,33]      [,34]      [,35]      [,36]      [,37]
[1,] 11.17361 6.222222 6.180556 7.104167 6.291667 5.027778 7.076389
[2,] 58.000000 66.000000 62.000000 56.000000 70.000000 59.000000 71.000000
[3,] 76.000000 74.000000 73.000000 72.000000 77.000000 72.000000 77.000000
      [,38]
[1,] 6.097222
[2,] 71.000000
[3,] 39.000000
> ylimits<-c(0.9*(min(preop,postop,na.rm=TRUE)),max(preop,postop, na.rm=TRUE))
> xlimits<-c(0,max(epi$withdrawaltime, na.rm=TRUE))
> xlabel<-"Days after surgery"
> plot(c(0,beforeandafterdata[1,1]),c(beforeandafterdata[2,1],
beforeandafterdata[3,1]),
type="l",col="black",xlim=xlimits,ylim=ylimits,ann=TRUE,axes=TRUE,xlab=xlabel,
main="Individual pre- and postoperative ROTEM-INTEM-MCF",ylab="Maximum clot
firmness (mm)", cex.main=1.3, cex.lab=1.4,lwd=1)
>
> for (x in 2:38) {lines(c(0,beforeandafterdata[1,x]),
c(beforeandafterdata[2,x], beforeandafterdata[3,x]), type="l", col="black",
lwd=1)}
>
> #normal range - enter manually!
> lines(c(-.4,-.4), c(50,72), type="l", lwd=6, lty=3)
>
> #Average pre and postoperative values at t=0 and t=mean withdrawal time
> preopmean<-mean(epi$Prov1intemMCF, na.rm=TRUE)
> postopmean<-mean(epi$Prov2intemMCF, na.rm=TRUE)
> lines(c(0, meanwithdrawaltime), c(preopmean, postopmean), type="l", lwd=6,
lty=4)
>
> #Significance value for pre- to postop change - see t.test or Wilcoxon's.
> text(8,65,"P<0.01", cex=2)
>
>
>
> #Before and after diagrams for INTEM-CT
> preop<-epi$Prov1intemCT
> postop<-epi$Prov2intemCT
> preopdata<-t(matrix(preop))
> postopdata<-t(matrix(postop))
> withdrawaltime<-t(matrix(epi$withdrawaltime))
> meanwithdrawaltime<-mean(epi$withdrawaltime, na.rm=TRUE)
> y<-rbind(preop, postop)
> beforeandafterdata<-rbind(withdrawaltime, preopdata, postopdata)
> beforeandafterdata
      [,1]      [,2]      [,3]      [,4] [,5]      [,6]      [,7]
[1,] 11.13194 6.118056 8.145833 3.107639 3.1 10.07292 7.104167
[2,] 161.00000 290.000000 171.000000 145.000000 357.0 211.000000 188.000000
[3,] 178.00000 159.000000 153.000000 142.000000 173.0 147.000000 110.000000
      [,8]      [,9]      [,10]      [,11]      [,12]      [,13]
[1,] 6.100694 2.201389 5.145833 5.069444 14.09722 5.131944

```

```

[2,] 175.000000 157.000000 177.000000 161.000000 137.000000 152.000000
[3,] 134.000000 152.000000 131.000000 164.000000 205.000000 171.000000
      [,14] [,15]      [,16]      [,17]      [,18]      [,19] [,20]
[1,] 6.180556      NA      2.121528      5.194444      15.15278      5.909722      NA
[2,] 195.000000      144      227.000000      202.000000      193.000000      229.000000      141
[3,] 227.000000      NA      156.000000      161.000000      212.000000      182.000000      NA
      [,21]      [,22]      [,23]      [,24]      [,25] [,26]      [,27]
[1,] 5.111111      4.958333      5.145833      2.097222      2.180556      NA      5.059028
[2,] 134.000000      147.000000      121.000000      199.000000      198.000000      170      158.000000
[3,] 200.000000      122.000000      167.000000      132.000000      223.000000      NA      168.000000
      [,28] [,29] [,30]      [,31]      [,32]      [,33]      [,34]
[1,] 3.138889      NA      NA      11.17361      6.222222      6.180556      7.104167
[2,] 159.000000      125      150      184.000000      181.000000      177.000000      133.000000
[3,] 147.000000      NA      NA      147.000000      150.000000      337.000000      148.000000
      [,35]      [,36]      [,37]      [,38]
[1,] 6.291667      5.027778      7.076389      6.097222
[2,] 204.000000      185.000000      148.000000      100.000000
[3,] 165.000000      133.000000      156.000000      94.000000
> ylimits<-c(0.9*(min(preop,postop,na.rm=TRUE)),max(preop,postop, na.rm=TRUE))
> xlimits<-c(0,max(epi$withdrawaltime, na.rm=TRUE))
> xlabel<-"Days after surgery"
> plot(c(0,beforeandafterdata[1,1]),c(beforeandafterdata[2,1],
beforeandafterdata[3,1]),
type="l",col="black",xlim=xlimits,ylim=ylimits,ann=TRUE,axes=TRUE,xlab=xlabel,
main="Individual pre- and postoperative ROTEM-INTEM-CT",ylab="Clotting time
(s)", cex.main=1.3, cex.lab=1.4,lwd=1)
> for (x in 2:38) {lines(c(0,beforeandafterdata[1,x]),
c(beforeandafterdata[2,x], beforeandafterdata[3,x]), type="l", col="black",
lwd=1)}
>
> #normal range - enter manually!
> lines(c(-.4,-.4), c(100,240), type="l", lwd=6, lty=3)
>
> #Average pre and postoperative values at t=0 and t=mean withdrawal time
> preopmean<-mean(epi$Prov1intemCT, na.rm=TRUE)
> postopmean<-mean(epi$Prov2intemCT, na.rm=TRUE)
> lines(c(0, meanwithdrawaltime), c(preopmean, postopmean), type="l", lwd=6,
lty=4)
>
> #Significance value for pre- to postop change - see t.test or Wilcoxon's.
> text(8,220,"N/S", cex=2)
>
>
>
> #Before and after diagrams for HEPTEM-MCF
> preop<-epi$Prov1heptemMCF
> postop<-epi$Prov2heptemMCF
> preopdata<-t(matrix(preop))
> postopdata<-t(matrix(postop))
> withdrawaltime<-t(matrix(epi$withdrawaltime))
> meanwithdrawaltime<-mean(epi$withdrawaltime, na.rm=TRUE)
> y<-rbind(preop, postop)
> beforeandafterdata<-rbind(withdrawaltime, preopdata, postopdata)
> beforeandafterdata
      [,1]      [,2]      [,3]      [,4] [,5]      [,6]      [,7]      [,8]
[1,] 11.13194      6.118056      8.145833      3.107639      3.1      10.07292      7.104167      6.100694

```



```

[2,] 60.000000 59.000000 72.000000 75.000000 64.0 63.000000 56.000000 62.000000
[3,] 71.000000 69.000000 75.000000 75.000000 70.0 75.000000 70.000000 70.000000
      [,9]      [,10]      [,11]      [,12]      [,13]      [,14]      [,15]
[1,] 2.201389 5.145833 5.069444 14.09722 5.131944 6.180556 NA
[2,] 73.000000 57.000000 59.000000 61.000000 63.000000 68.000000 53
[3,] 75.000000 NA 73.000000 74.000000 63.000000 67.000000 NA
      [,16]      [,17]      [,18]      [,19]      [,20]      [,21]      [,22]
[1,] 2.121528 5.194444 15.15278 5.909722 NA 5.111111 4.958333
[2,] 61.000000 54.000000 59.00000 55.000000 61 60.000000 63.000000
[3,] 57.000000 66.000000 76.00000 67.000000 NA 71.000000 70.000000
      [,23]      [,24]      [,25]      [,26]      [,27]      [,28]      [,29]      [,30]
[1,] 5.145833 2.097222 2.180556 NA 5.059028 3.138889 NA NA
[2,] 68.000000 58.000000 62.000000 70 59.000000 55.000000 60 68
[3,] 71.000000 63.000000 62.000000 NA 58.000000 48.000000 NA NA
      [,31]      [,32]      [,33]      [,34]      [,35]      [,36]      [,37]
[1,] 11.17361 6.222222 6.180556 7.104167 6.291667 5.027778 7.076389
[2,] 58.00000 65.000000 63.000000 52.000000 69.000000 58.000000 69.000000
[3,] 71.00000 72.000000 74.000000 70.000000 76.000000 71.000000 77.000000
      [,38]
[1,] 6.097222
[2,] 71.000000
[3,] 74.000000

```

```

> ylimits<-c(0.9*(min(preop,postop,na.rm=TRUE)),max(preop,postop, na.rm=TRUE))
> xlimits<-c(0,max(epi$withdrawaltime, na.rm=TRUE))
> xlabel<-"Days after surgery"
> plot(c(0,beforeandafterdata[1,1]),c(beforeandafterdata[2,1],
beforeandafterdata[3,1]),
type="l",col="black",xlim=xlimits,ylim=ylimits,ann=TRUE,axes=TRUE,xlab=xlabel,
main="Individual pre- and postoperative ROTEM-HEPTEM-MCF",ylab="Maximum clot
firmness (mm)", cex.main=1.3, cex.lab=1.4,lwd=1)
>
> for (x in 2:38) {lines(c(0,beforeandafterdata[1,x]),
c(beforeandafterdata[2,x], beforeandafterdata[3,x]), type="l", col="black",
lwd=1)}
>
> #normal range - enter manually!
> lines(c(-.4,-.4), c(50,72), type="l", lwd=6, lty=3)
>
> #Average pre and postoperative values at t=0 and t=mean withdrawal time
> preopmean<-mean(epi$Prov1heptemMCF, na.rm=TRUE)
> postopmean<-mean(epi$Prov2heptemMCF, na.rm=TRUE)
> lines(c(0, meanwithdrawaltime), c(preopmean, postopmean), type="l", lwd=6,
lty=4)
>
> #Significance value for pre- to postop change - see t.test or Wilcoxon's.
> text(8,64,"P<0.01", cex=2)
>
>
>
> #Before and after diagrams for HEPTEM-CT
> preop<-epi$Prov1heptemCT
> postop<-epi$Prov2heptemCT
> preopdata<-t(matrix(preop))
> postopdata<-t(matrix(postop))
> withdrawaltime<-t(matrix(epi$withdrawaltime))
> meanwithdrawaltime<-mean(epi$withdrawaltime, na.rm=TRUE)

```

```

> y<-rbind(preop, postop)
> beforeandafterdata<-rbind(withdrawaltime, preopdata, postopdata)
> beforeandafterdata
      [,1]      [,2]      [,3]      [,4]      [,5]      [,6]      [,7]
[1,] 11.13194  6.118056  8.145833  3.107639  3.1  10.07292  7.104167
[2,] 188.000000 357.000000 223.000000 225.000000 139.0 252.000000 197.000000
[3,] 184.000000 166.000000 162.000000 151.000000 211.0 169.000000 127.000000
      [,8]      [,9]      [,10]      [,11]      [,12]      [,13]
[1,]  6.100694  2.201389  5.145833  5.069444  14.09722  5.131944
[2,] 199.000000 174.000000 178.000000 220.000000 169.000000 185.000000
[3,] 145.000000 133.000000  61.000000 207.000000 241.000000 205.000000
      [,14] [,15]      [,16]      [,17]      [,18]      [,19] [,20]
[1,]  6.180556  NA  2.121528  5.194444  15.15278  5.909722  NA
[2,] 125.000000  177 132.000000 287.000000 298.000000 135.000000  190
[3,] 261.000000  NA 184.000000 223.000000 212.000000 228.000000  NA
      [,21]      [,22]      [,23]      [,24]      [,25] [,26]      [,27]
[1,]  5.111111  4.958333  5.145833  2.097222  2.180556  NA  5.059028
[2,] 183.000000 153.000000 182.000000 150.000000 219.000000  155 157.000000
[3,] 229.000000 130.000000 216.000000 163.000000 250.000000  NA 159.000000
      [,28] [,29] [,30]      [,31]      [,32]      [,33]      [,34]
[1,]  3.138889  NA  NA  11.17361  6.222222  6.180556  7.104167
[2,] 199.000000  143  180 183.000000 162.000000 100.000000 182.000000
[3,] 160.000000  NA  NA 147.000000 199.000000 278.000000 158.000000
      [,35]      [,36]      [,37]      [,38]
[1,]  6.291667  5.027778  7.076389  6.097222
[2,] 219.000000 205.000000 159.000000 154.000000
[3,] 165.000000 146.000000 154.000000 173.000000
> ylimits<-c(0.9*(min(preop,postop,na.rm=TRUE)),max(preop,postop, na.rm=TRUE))
> xlimits<-c(0,max(ewi$withdrawaltime, na.rm=TRUE))
> xlabel<-"Days after surgery"
> plot(c(0,beforeandafterdata[1,1]),c(beforeandafterdata[2,1],
beforeandafterdata[3,1]),
type="l",col="black",xlim=xlimits,ylim=ylimits,ann=TRUE,axes=TRUE,xlab=xlabel,
main="Individual pre- and postoperative ROTEM-HEPTEM-CT",ylab="Clotting time
(s)", cex.main=1.3, cex.lab=1.4,lwd=1)
> for (x in 2:38) {lines(c(0,beforeandafterdata[1,x]),
c(beforeandafterdata[2,x], beforeandafterdata[3,x]), type="l", col="black",
lwd=1)}
>
> #normal range - enter manually!
> lines(c(-.4,-.4), c(100,240), type="l", lwd=6, lty=3)
>
> #Average pre and postoperative values at t=0 and t=mean withdrawal time
> preopmean<-mean(ewi$Prov1heptemCT, na.rm=TRUE)
> postopmean<-mean(ewi$Prov2heptemCT, na.rm=TRUE)
> lines(c(0, meanwithdrawaltime), c(preopmean, postopmean), type="l", lwd=6,
lty=4)
>
> #Significance value for pre- to postop change - see t.test or Wilcoxon's.
> text(7,220,"N/S", cex=2)
>
>
> #Before and after diagrams for FIBTEM-MCF
> preop<-ewi$Prov1fibtemMCF
> postop<-ewi$Prov2fibtemMCF
> preopdata<-t(matrix(preop))

```

```

> postopdata<-t(matrix(postop))
> withdrawaltime<-t(matrix(epi$withdrawaltime))
> meanwithdrawaltime<-mean(epi$withdrawaltime, na.rm=TRUE)
> y<-rbind(preop, postop)
> beforeandafterdata<-rbind(withdrawaltime, preopdata, postopdata)
> beforeandafterdata
      [,1]      [,2]      [,3]      [,4] [,5]      [,6]      [,7]      [,8]
[1,] 11.13194  6.118056  8.145833  3.107639  3.1 10.07292  7.104167  6.100694
[2,] 11.000000 20.000000 35.000000 26.000000 22.0 19.000000 12.000000 15.000000
[3,] 43.000000 37.000000 40.000000 39.000000 37.0 40.000000 52.000000 34.000000
      [,9]      [,10]      [,11]      [,12]      [,13]      [,14] [,15]
[1,]  2.201389  5.145833  5.069444 14.09722  5.131944  6.180556  NA
[2,] 34.000000 25.000000 21.000000 13.00000 22.000000 26.000000  17
[3,] 35.000000 31.000000 41.000000 40.00000 31.000000 24.000000  NA
      [,16]      [,17]      [,18]      [,19] [,20]      [,21]      [,22]
[1,]  2.121528  5.194444 15.15278  5.909722  NA  5.111111  4.958333
[2,] 13.000000 13.000000 17.00000 11.00000  19 19.000000 13.000000
[3,] 15.000000 25.000000 48.00000 31.00000  NA 29.000000 26.000000
      [,23]      [,24]      [,25] [,26]      [,27]      [,28] [,29] [,30]
[1,]  5.145833  2.097222  2.180556  NA  5.059028  3.138889  NA  NA
[2,] 28.000000 11.000000 16.000000  29 30.000000 13.000000  17  26
[3,] 31.000000 22.000000 24.000000  NA 16.000000 20.000000  NA  NA
      [,31]      [,32]      [,33]      [,34]      [,35]      [,36]      [,37]
[1,] 11.17361  6.222222  6.180556  7.104167  6.291667  5.027778  7.076389
[2,] 16.00000  NA 18.000000 13.000000 32.000000 20.000000 17.000000
[3,] 49.00000 39.000000 42.000000 27.000000 38.000000 31.000000 34.000000
      [,38]
[1,]  6.097222
[2,] 34.000000
[3,] 42.000000
> ylimits<-c(0.9*(min(preop,postop,na.rm=TRUE)),max(preop,postop, na.rm=TRUE))
> xlimits<-c(0,max(epi$withdrawaltime, na.rm=TRUE))
> xlabel<- "Days after surgery"
> plot(c(0,beforeandafterdata[1,1]),c(beforeandafterdata[2,1],
beforeandafterdata[3,1]),
type="l",col="black",xlim=xlimits,ylim=ylimits,ann=TRUE,axes=TRUE,xlab=xlabel,
main="Individual pre- and postoperative ROTEM-INTEM-MCF",ylab="Maximum clot
firmness (mm)", cex.main=1.3, cex.lab=1.4,lwd=1)
>
> for (x in 2:38) {lines(c(0,beforeandafterdata[1,x]),
c(beforeandafterdata[2,x], beforeandafterdata[3,x]), type="l", col="black",
lwd=1)}
>
> #normal range - enter manually!
> lines(c(-.4,-.4), c(9,25), type="l", lwd=6, lty=3)
>
> #Average pre and postoperative values at t=0 and t=mean withdrawal time
> preopmean<-mean(epi$Prov1fibtemMCF, na.rm=TRUE)
> postopmean<-mean(epi$Prov2fibtemMCF, na.rm=TRUE)
> lines(c(0, meanwithdrawaltime), c(preopmean, postopmean), type="l", lwd=6,
lty=4)
>
> #Significance value for pre- to postop change - see t.test or Wilcoxon's.
> text(8,64,"P<0.01", cex=2)
>
>

```

```

> #Before and after diagrams for HEPT-EM-INTEM-MCF
> preop<-epi$preopHEPT-EMminusINTEMmcf
> postop<-epi$postopHEPT-EMminusINTEMmcf
> preopdata<-t(matrix(preop))
> postopdata<-t(matrix(postop))
> withdrawaltime<-t(matrix(epi$withdrawaltime))
> meanwithdrawaltime<-mean(epi$withdrawaltime, na.rm=TRUE)
> y<-rbind(preop, postop)
> beforeandafterdata<-rbind(withdrawaltime, preopdata, postopdata)
> beforeandafterdata
      [,1]      [,2]      [,3]      [,4] [,5]      [,6]      [,7]      [,8]
[1,] 11.13194  6.118056  8.145833  3.107639  3.1 10.07292  7.104167  6.100694
[2,]  0.000000 -2.000000 -3.000000 -2.000000  2.0 -2.000000  0.000000  1.000000
[3,] -3.000000 -6.000000 -4.000000  1.000000  1.0 -2.000000 -3.000000 -3.000000
      [,9]      [,10]      [,11]      [,12]      [,13]      [,14] [,15]
[1,]  2.201389  5.145833  5.069444 14.09722  5.131944  6.180556  NA
[2,] -1.000000 -4.000000 -4.000000  2.00000 -1.000000 -3.000000  -3
[3,]  2.000000      NA  0.000000 -2.00000 -1.000000 -1.000000  NA
      [,16]      [,17]      [,18]      [,19] [,20]      [,21]      [,22]      [,23]
[1,]  2.121528  5.194444 15.15278  5.909722  NA 5.111111  4.958333  5.145833
[2,]  1.000000 -3.000000 -2.00000  1.000000  -4 0.000000  0.000000  0.000000
[3,] -4.000000 -2.000000 -1.00000 -2.000000  NA 0.000000 -1.000000  0.000000
      [,24]      [,25] [,26]      [,27]      [,28] [,29] [,30]      [,31]
[1,]  2.097222  2.180556  NA 5.059028  3.138889  NA  NA 11.17361
[2,] -1.000000  0.000000  0 1.000000 -2.000000  -4  -1 0.00000
[3,] -1.000000  0.000000  NA 2.000000  0.000000  NA  NA -5.00000
      [,32]      [,33]      [,34]      [,35]      [,36]      [,37]      [,38]
[1,]  6.222222  6.180556  7.104167  6.291667  5.027778  7.076389  6.097222
[2,] -1.000000  1.000000 -4.000000 -1.000000 -1.000000 -2.000000  0.000000
[3,] -2.000000  1.000000 -2.000000 -1.000000 -1.000000  0.000000 35.000000
> ylimits<-c(1.1*(min(preop,postop,na.rm=TRUE)),max(preop,postop, na.rm=TRUE))
> xlimits<-c(0,max(epi$withdrawaltime, na.rm=TRUE))
> xlabel<- "Days after surgery"
> plot(c(0,beforeandafterdata[1,1]),c(beforeandafterdata[2,1],
beforeandafterdata[3,1]),
type="l",col="black",xlim=xlimits,ylim=ylimits,ann=TRUE,axes=TRUE,xlab=xlabel,
main="Individual pre- and postoperative ROTEM-HEPT-EM-INTEM-MCF",ylab="Maximum
clot firmness (mm)", cex.main=1.3, cex.lab=1.4,lwd=1)
>
> for (x in 2:38) {lines(c(0,beforeandafterdata[1,x]),
c(beforeandafterdata[2,x], beforeandafterdata[3,x]), type="l", col="black",
lwd=1)}
>
> #normal range - enter manually!
> #there are no normal ranges for HEPT-EM-INTEM. lines(c(-.4,-.4), c(50,72),
type="l", lwd=6, lty=3)
>
> #Average pre and postoperative values at t=0 and t=mean withdrawal time
> preopmean<-mean(epi$preopHEPT-EMminusINTEMmcf, na.rm=TRUE)
> postopmean<-mean(epi$postopHEPT-EMminusINTEMmcf, na.rm=TRUE)
> lines(c(0, meanwithdrawaltime), c(preopmean, postopmean), type="l", lwd=6,
lty=4)
>
> #Significance value for pre- to postop change - see t.test or Wilcoxon's.
> text(8,3,"N/S", cex=2)
>

```

```

>
>
> #Before and after diagrams for INTEM-HEPTEM-CT
> preop<-epi$preopINTEMminusHEPTEMct
> postop<-epi$postopINTEMminusHEPTEMct
> preopdata<-t(matrix(preop))
Error in matrix(preop) : 'data' must be of a vector type, was 'NULL'
> postopdata<-t(matrix(postop))
Error in matrix(postop) : 'data' must be of a vector type, was 'NULL'
> withdrawaltime<-t(matrix(epi$withdrawaltime))
> meanwithdrawaltime<-mean(epi$withdrawaltime, na.rm=TRUE)
> y<-rbind(preop, postop)
> beforeandafterdata<-rbind(withdrawaltime, preopdata, postopdata)
> ylimits<-c(1.1*(min(preop,postop,na.rm=TRUE)),max(preop,postop, na.rm=TRUE))
Warning messages:
1: In min(preop, postop, na.rm = TRUE) :
  no non-missing arguments to min; returning Inf
2: In max(preop, postop, na.rm = TRUE) :
  no non-missing arguments to max; returning -Inf
> xlimits<-c(0,max(epi$withdrawaltime, na.rm=TRUE))
> xlabel<-"Days after surgery"
> plot(c(0,beforeandafterdata[1,1]),c(beforeandafterdata[2,1],
beforeandafterdata[3,1]),
type="l",col="black",xlim=xlimits,ylim=ylimits,ann=TRUE,axes=TRUE,xlab=xlabel,
main="Individual pre- and postoperative ROTEM-INTEM-HEPTEM-CT",ylab="Clotting
time (s)", cex.main=1.3, cex.lab=1.4,lwd=1)
Error in plot.window(...) : need finite 'ylim' values
> for (x in 2:38) {lines(c(0,beforeandafterdata[1,x]),
c(beforeandafterdata[2,x], beforeandafterdata[3,x]), type="l", col="black",
lwd=1)}
>
> #normal range - enter manually!
> ## there are no normal values here. lines(c(-.4,-.4), c(100,240), type="l",
lwd=6, lty=3)
>
> #Average pre and postoperative values at t=0 and t=mean withdrawal time
> preopmean<-mean(epi$preopINTEMminusHEPTEMct, na.rm=TRUE)
Warning message:
In mean.default(epi$preopINTEMminusHEPTEMct, na.rm = TRUE) :
  argument is not numeric or logical: returning NA
> postopmean<-mean(epi$postopINTEMminusHEPTEMct, na.rm=TRUE)
Warning message:
In mean.default(epi$postopINTEMminusHEPTEMct, na.rm = TRUE) :
  argument is not numeric or logical: returning NA
> lines(c(0, meanwithdrawaltime), c(preopmean, postopmean), type="l", lwd=6,
lty=4)
>
> #Significance value for pre- to postop change - see t.test or Wilcoxon's.
> text(7,13,"N/S", cex=2)
>
>
>
>
>
> ##Multiplate before and after diagrams
> #Before and after diagrams for multiplateADP

```

```

> preop<-epi$Prov1multiplateADP
> postop<-epi$Prov2multiplateADP
> preopdata<-t(matrix(preop))
> postopdata<-t(matrix(postop))
> withdrawaltime<-t(matrix(epi$withdrawaltime))
> meanwithdrawaltime<-mean(epi$withdrawaltime, na.rm=TRUE)
> y<-rbind(preop, postop)
> beforeandafterdata<-rbind(withdrawaltime, preopdata, postopdata)
> beforeandafterdata
      [,1] [,2] [,3] [,4] [,5] [,6] [,7]
[1,] 11.13194 6.118056 8.145833 3.107639 3.1 10.07292 7.104167
[2,] 63.000000 63.000000 63.000000 81.000000 89.0 67.000000 13.000000
[3,] 114.000000 84.000000 16.000000 94.000000 57.0 61.000000 134.000000
      [,8] [,9] [,10] [,11] [,12] [,13] [,14]
[1,] 6.100694 2.201389 5.145833 5.069444 14.09722 5.131944 6.180556
[2,] 79.000000 76.000000 48.000000 94.000000 26.000000 41.000000 82.000000
[3,] 94.000000 57.000000 65.000000 66.000000 85.000000 59.000000 82.000000
      [,15] [,16] [,17] [,18] [,19] [,20] [,21] [,22]
[1,] NA 2.121528 5.194444 15.15278 5.909722 NA 5.111111 4.958333
[2,] 46 60.000000 54.000000 67.000000 72.000000 62 62.000000 86.000000
[3,] NA 47.000000 64.000000 143.000000 98.000000 NA 95.000000 72.000000
      [,23] [,24] [,25] [,26] [,27] [,28] [,29] [,30]
[1,] 5.145833 2.097222 2.180556 NA 5.059028 3.138889 NA NA
[2,] 69.000000 95.000000 89.000000 82 77.000000 60.000000 81 88
[3,] 72.000000 50.000000 54.000000 NA 59.000000 29.000000 NA NA
      [,31] [,32] [,33] [,34] [,35] [,36] [,37]
[1,] 11.17361 6.222222 6.180556 7.104167 6.291667 5.027778 7.076389
[2,] 38.000000 86.000000 95.000000 51.000000 86.000000 29.000000 63.000000
[3,] 102.000000 87.000000 115.000000 86.000000 78.000000 69.000000 91.000000
      [,38]
[1,] 6.097222
[2,] 105.000000
[3,] 75.000000
> ylimits<-c(0.9*(min(preop,postop,na.rm=TRUE)),max(preop,postop, na.rm=TRUE))
> xlimits<-c(0,max(epi$withdrawaltime, na.rm=TRUE))
> xlabel<- "Days after surgery"
> plot(c(0,beforeandafterdata[1,1]),c(beforeandafterdata[2,1],
beforeandafterdata[3,1]),
type="l",col="black",xlim=xlimits,ylim=ylimits,ann=TRUE,axes=TRUE,xlab=xlabel,
main="Individual pre- and postoperative Multiplate ADP",ylab="Area under curve
(AUC)", cex.main=1.3, cex.lab=1.4,lwd=1)
>
> for (x in 2:38) {lines(c(0,beforeandafterdata[1,x]),
c(beforeandafterdata[2,x], beforeandafterdata[3,x]), type="l", col="black",
lwd=1)}
>
> #normal range - enter manually!
> lines(c(-.4,-.4), c(57,113), type="l", lwd=6, lty=3)
>
> #Average pre and postoperative values at t=0 and t=mean withdrawal time
> preopmean<-mean(epi$Prov1multiplateADP, na.rm=TRUE)
> postopmean<-mean(epi$Prov2multiplateADP, na.rm=TRUE)
> lines(c(0, meanwithdrawaltime), c(preopmean, postopmean), type="l", lwd=6,
lty=4)
>
> #Significance value for pre- to postop change - see t.test or Wilcoxon's.

```

```

> text(8,72,"N/S", cex=2)
>
>
>
> #Before and after diagrams for multiplateCOL
> preop<-epi$Prov1multiplateCOL
> postop<-epi$Prov2multiplateCOL
> preopdata<-t(matrix(preop))
> postopdata<-t(matrix(postop))
> withdrawaltime<-t(matrix(epi$withdrawaltime))
> meanwithdrawaltime<-mean(epi$withdrawaltime, na.rm=TRUE)
> y<-rbind(preop, postop)
> beforeandafterdata<-rbind(withdrawaltime, preopdata, postopdata)
> beforeandafterdata
      [,1]      [,2]      [,3]      [,4] [,5]      [,6]      [,7]
[1,] 11.13194  6.118056  8.145833  3.107639  3.1  10.07292  7.104167
[2,] 66.000000 64.000000 40.000000 100.000000 66.0  67.000000  11.000000
[3,] 131.000000 96.000000 81.000000 132.000000 76.0 153.000000 152.000000
      [,8]      [,9]      [,10]      [,11]      [,12]      [,13]      [,14]
[1,]  6.100694  2.201389  5.145833  5.069444  14.09722  5.131944  6.180556
[2,] 94.000000 100.000000 60.000000 70.000000  42.00000 45.000000 72.000000
[3,] 101.000000 113.000000 71.000000 70.000000 118.00000 64.000000 76.000000
      [,15]      [,16]      [,17]      [,18]      [,19] [,20]      [,21]      [,22]
[1,]  NA  2.121528  5.194444  15.15278  5.909722  NA  5.111111  4.958333
[2,]  40 61.000000 25.000000  41.00000 56.000000  64 54.000000 75.000000
[3,]  NA 53.000000 64.000000 159.00000 93.000000  NA 98.000000 73.000000
      [,23]      [,24]      [,25] [,26]      [,27]      [,28] [,29] [,30]
[1,]  5.145833  2.097222  2.180556  NA  5.059028  3.138889  NA  NA
[2,] 42.000000 76.000000 69.000000  86 57.000000 46.000000  67  86
[3,] 74.000000 75.000000 75.000000  NA 52.000000 35.000000  NA  NA
      [,31]      [,32]      [,33]      [,34]      [,35]      [,36]      [,37]
[1,] 11.17361  6.222222  6.180556  7.104167  6.291667  5.027778  7.076389
[2,] 46.000000 52.000000 88.000000 35.000000 98.000000 38.000000 65.000000
[3,] 106.000000 108.000000 98.000000 104.000000 129.000000 79.000000 115.000000
      [,38]
[1,]  6.097222
[2,] 102.000000
[3,]  88.000000
> ylimits<-c(0.9*(min(preop,postop,na.rm=TRUE)),max(preop,postop, na.rm=TRUE))
> xlimits<-c(0,max(epi$withdrawaltime, na.rm=TRUE))
> xlabel<- "Days after surgery"
> plot(c(0,beforeandafterdata[1,1]),c(beforeandafterdata[2,1],
beforeandafterdata[3,1]),
type="l",col="black",xlim=xlimits,ylim=ylimits,ann=TRUE,axes=TRUE,xlab=xlabel,
main="Individual pre- and postoperative Multiplate COL",ylab="Area under curve
(AUC)", cex.main=1.3, cex.lab=1.4,lwd=1)
>
> for (x in 2:38) {lines(c(0,beforeandafterdata[1,x]),
c(beforeandafterdata[2,x], beforeandafterdata[3,x]), type="l", col="black",
lwd=1)}
>
> #normal range - enter manually!
> lines(c(-.4,-.4), c(72,125), type="l", lwd=6, lty=3)
>
> #Average pre and postoperative values at t=0 and t=mean withdrawal time
> preopmean<-mean(epi$Prov1multiplateCOL, na.rm=TRUE)

```

```

> postopmean<-mean(epi$Prov2multiplateCOL, na.rm=TRUE)
> lines(c(0, meanwithdrawaltime), c(preopmean, postopmean), type="l", lwd=6,
lty=4)
>
> #Significance value for pre- to postop change - see t.test or Wilcoxon's.
> text(9,72,"P<0.01", cex=2)
>
>
> #Before and after diagrams for multiplateTRAP
> preop<-epi$Prov1multiplateTRAP
> postop<-epi$Prov2multiplateTRAP
> preopdata<-t(matrix(preop))
> postopdata<-t(matrix(postop))
> withdrawaltime<-t(matrix(epi$withdrawaltime))
> meanwithdrawaltime<-mean(epi$withdrawaltime, na.rm=TRUE)
> y<-rbind(preop, postop)
> beforeandafterdata<-rbind(withdrawaltime, preopdata, postopdata)
> beforeandafterdata
      [,1]      [,2]      [,3]      [,4] [,5]      [,6]      [,7]
[1,] 11.13194  6.118056  8.145833  3.107639  3.1  10.07292  7.104167
[2,] 112.000000 115.000000 102.000000 129.000000 119.0 101.000000 22.000000
[3,] 150.000000 138.000000 135.000000 152.000000 97.0 153.000000 150.000000
      [,8]      [,9]      [,10]      [,11]      [,12]      [,13]      [,14]
[1,] 6.100694  2.201389  5.145833  5.069444  14.09722  5.131944  6.180556
[2,] 128.000000 126.000000 96.000000 124.000000 79.000000 80.000000 83.000000
[3,] 120.000000 102.000000 79.000000 93.000000 104.000000 89.000000 143.000000
      [,15]      [,16]      [,17]      [,18]      [,19] [,20]      [,21]
[1,] NA 2.121528  5.194444  15.15278  5.909722  NA  5.111111
[2,] 75 92.000000 38.000000 79.000000 99.000000 101 113.000000
[3,] NA 24.000000 82.000000 154.000000 114.000000  NA 108.000000
      [,22]      [,23]      [,24]      [,25] [,26]      [,27]      [,28]
[1,] 4.958333  5.145833  2.097222  2.180556  NA  5.059028  3.138889
[2,] 132.000000 71.000000 130.000000 105.000000 163 91.000000 113.000000
[3,] 103.000000 76.000000 71.000000 73.000000  NA 78.000000 41.000000
      [,29] [,30]      [,31]      [,32]      [,33]      [,34]      [,35]
[1,] NA  NA  11.17361  6.222222  6.180556  7.104167  6.291667
[2,] 117 137 85.000000 138.000000 129.000000 62.000000 126.000000
[3,] NA  NA 109.000000 145.000000 119.000000 124.000000 139.000000
      [,36]      [,37]      [,38]
[1,] 5.027778  7.076389  6.097222
[2,] 31.000000 106.000000 160.000000
[3,] 121.000000 87.000000 123.000000
> ylimits<-c(0.9*(min(preop,postop,na.rm=TRUE)),max(preop,postop, na.rm=TRUE))
> xlimits<-c(0,max(epi$withdrawaltime, na.rm=TRUE))
> xlabel<-"Days after surgery"
> plot(c(0,beforeandafterdata[1,1]),c(beforeandafterdata[2,1],
beforeandafterdata[3,1]),
type="l",col="black",xlim=xlimits,ylim=ylimits,ann=TRUE,axes=TRUE,xlab=xlabel,
main="Individual pre- and postoperative Multiplate TRAP",ylab="Area under curve
(AUC)", cex.main=1.3, cex.lab=1.4,lwd=1)
>
> for (x in 2:38) {lines(c(0,beforeandafterdata[1,x]),
c(beforeandafterdata[2,x], beforeandafterdata[3,x]), type="l", col="black",
lwd=1)}
>
> #normal range - enter manually!

```



```

> lines(c(-.4,-.4), c(84,128), type="l", lwd=6, lty=3)
>
> #Average pre and postoperative values at t=0 and t=mean withdrawal time
> preopmean<-mean(epi$Prov1multiplateTRAP, na.rm=TRUE)
> postopmean<-mean(epi$Prov2multiplateTRAP, na.rm=TRUE)
> lines(c(0, meanwithdrawaltime), c(preopmean, postopmean), type="l", lwd=6,
lty=4)
>
> #Significance value for pre- to postop change - see t.test or Wilcoxon's.
> text(9,110,"N/S", cex=2)
>
>
>
> #Before and after diagrams for multiplateASPI
> preop<-epi$Prov1multiplateASPI
> postop<-epi$Prov2multiplateASPI
> preopdata<-t(matrix(preop))
> postopdata<-t(matrix(postop))
> withdrawaltime<-t(matrix(epi$withdrawaltime))
> meanwithdrawaltime<-mean(epi$withdrawaltime, na.rm=TRUE)
> y<-rbind(preop, postop)
> beforeandafterdata<-rbind(withdrawaltime, preopdata, postopdata)
> beforeandafterdata
      [,1]      [,2]      [,3]      [,4] [,5]      [,6]      [,7]
[1,] 11.13194  6.118056  8.145833  3.107639  3.1  10.07292  7.104167
[2,] 82.000000 81.000000 79.000000 103.000000 68.0  75.000000 48.000000
[3,] 130.000000 97.000000 123.000000 129.000000 85.0 144.000000 148.000000
      [,8]      [,9]      [,10]     [,11]     [,12]     [,13]     [,14]
[1,]  6.100694  2.201389  5.145833  5.069444  14.09722  5.131944  6.180556
[2,] 90.000000 58.000000 74.000000 83.000000  63.000000 68.000000  84.000000
[3,] 99.000000 55.000000 57.000000 87.000000 123.000000 81.000000 106.000000
      [,15]     [,16]     [,17]     [,18]     [,19] [,20]     [,21]     [,22]
[1,]    NA  2.121528  5.194444  15.15278  5.909722    NA  5.111111  4.958333
[2,]   52 66.000000 24.000000  35.00000  71.000000    76 70.000000  99.000000
[3,]    NA 21.000000  6.000000 163.00000  77.000000    NA 95.000000 107.000000
      [,23]     [,24]     [,25] [,26]     [,27]     [,28] [,29] [,30]
[1,]  5.145833  2.097222  2.180556    NA  5.059028  3.138889    NA    NA
[2,] 21.000000 88.000000 91.000000  135 64.000000 73.000000    77    55
[3,] 63.000000 78.000000 75.000000    NA 18.000000 27.000000    NA    NA
      [,31]     [,32]     [,33]     [,34]     [,35]     [,36]
[1,] 11.17361  6.222222  6.180556  7.104167  6.291667  5.027778
[2,] 93.00000  34.000000 99.000000 56.000000 75.000000 39.000000
[3,] 120.00000 125.00000 115.00000 83.000000 143.00000 109.00000
      [,37]     [,38]
[1,]  7.076389  6.097222
[2,] 72.000000 119.000000
[3,] 120.000000 96.000000
> ylimits<-c(0.9*(min(preop,postop,na.rm=TRUE)),max(preop,postop, na.rm=TRUE))
> xlimits<-c(0,max(epi$withdrawaltime, na.rm=TRUE))
> xlabel<- "Days after surgery"
> plot(c(0,beforeandafterdata[1,1]),c(beforeandafterdata[2,1],
beforeandafterdata[3,1]),
type="l",col="black",xlim=xlimits,ylim=ylimits,ann=TRUE,axes=TRUE,xlab=xlabel,
main="Individual pre- and postoperative Multiplate ASPI",ylab="Area under curve
(AUC)", cex.main=1.3, cex.lab=1.4,lwd=1)

```

```

>
> for (x in 2:38) {lines(c(0,beforeandafterdata[1,x]),
c(beforeandafterdata[2,x], beforeandafterdata[3,x]), type="l", col="black",
lwd=1)}
>
> #normal range - enter manually!
> lines(c(-.4,-.4), c(71,115), type="l", lwd=6, lty=3)
>
> #Average pre and postoperative values at t=0 and t=mean withdrawal time
> preopmean<-mean(epi$Prov1multiplateASPI, na.rm=TRUE)
> postopmean<-mean(epi$Prov2multiplateASPI, na.rm=TRUE)
> lines(c(0, meanwithdrawaltime), c(preopmean, postopmean), type="l", lwd=6,
lty=4)
>
> #Significance value for pre- to postop change - see t.test or Wilcoxon's.
> text(9,90,"P<0.01", cex=2)
>
>
>
>
> #Before and after diagrams for PK
> preop<-epi$Prov1rutinPK
> postop<-epi$Prov2rutinPK
> preopdata<-t(matrix(preop))
> postopdata<-t(matrix(postop))
> withdrawaltime<-t(matrix(epi$withdrawaltime))
> meanwithdrawaltime<-mean(epi$withdrawaltime, na.rm=TRUE)
> y<-rbind(preop, postop)
> beforeandafterdata<-rbind(withdrawaltime, preopdata, postopdata)
> beforeandafterdata
      [,1]      [,2]      [,3]      [,4] [,5]      [,6]      [,7]      [,8]
[1,] 11.13194 6.118056 8.145833 3.107639 3.1 10.07292 7.104167 6.100694
[2,] 1.000000      NA 1.100000 1.100000 1.1 1.000000 1.300000 1.100000
[3,] 1.200000 1.100000 1.100000 1.200000 1.3 1.200000 1.300000 1.300000
      [,9]      [,10]      [,11]      [,12]      [,13]      [,14] [,15]      [,16]
[1,] 2.201389 5.145833 5.069444 14.09722 5.131944 6.180556      NA 2.121528
[2,] 0.900000 0.900000 1.000000 1.000000 1.000000 1.100000 0.9 1.000000
[3,] 1.000000 1.200000 1.200000 1.400000 1.100000 1.100000      NA 1.600000
      [,17]      [,18]      [,19] [,20]      [,21]      [,22]      [,23]      [,24]
[1,] 5.194444 15.15278 5.909722      NA 5.111111 4.958333 5.145833 2.097222
[2,] 1.100000 1.000000 1.000000      1 1.000000 1.000000 1.100000 0.900000
[3,] 1.100000 1.200000 1.100000      NA 1.100000 1.100000 1.200000 1.300000
      [,25] [,26]      [,27]      [,28] [,29] [,30]      [,31]      [,32]      [,33]
[1,] 2.180556      NA 5.059028 3.138889      NA      NA 11.17361 6.222222 6.180556
[2,]      NA      0.9 1.000000 1.100000      NA      1.1 1.000000 1.000000 1.100000
[3,] 1.000000      0.9 1.100000 1.500000 1.1      NA 1.000000 1.000000 1.100000
      [,34]      [,35]      [,36]      [,37]      [,38]
[1,] 7.104167 6.291667 5.027778 7.076389 6.097222
[2,]      NA 1.100000 1.100000 1.100000 0.900000
[3,] 1.000000 1.300000 1.100000 1.400000 1.000000
> ylimits<-c(0.9*(min(preop,postop,na.rm=TRUE)),max(preop,postop, na.rm=TRUE))
> xlimits<-c(0,max(epi$withdrawaltime, na.rm=TRUE))
> xlabel<-"Days after surgery"
> plot(c(0,beforeandafterdata[1,1]),c(beforeandafterdata[2,1],
beforeandafterdata[3,1]),

```

```

type="l",col="black",xlim=xlimits,ylim=ylimits,ann=TRUE,axes=TRUE,xlab=xlabel,
main="Individual pre- and postoperative PT-INR",ylab="PT-INR", cex.main=1.3,
cex.lab=1.4,lwd=1)
>
> for (x in 2:38) {lines(c(0,beforeandafterdata[1,x]),
c(beforeandafterdata[2,x], beforeandafterdata[3,x]), type="l", col="black",
lwd=1)}
>
> #normal range - enter manually!
> lines(c(-.4,-.4), c(0.9,1.2), type="l", lwd=6, lty=3)
>
> #Average pre and postoperative values at t=0 and t=mean withdrawal time
> preopmean<-mean(eps$Prov1rutinPK, na.rm=TRUE)
> postopmean<-mean(eps$Prov2rutinPK, na.rm=TRUE)
> lines(c(0, meanwithdrawaltime), c(preopmean, postopmean), type="l", lwd=6,
lty=4)
>
> t.test(eps$Prov1rutinPK,eps$Prov2rutinPK, alternative =
c("two.sided"),paired=TRUE)

```

#### Paired t-test

```

data: eps$Prov1rutinPK and eps$Prov2rutinPK
t = -5.6176, df = 30, p-value = 4.077e-06
alternative hypothesis: true difference in means is not equal to 0
95 percent confidence interval:
 -0.20673186 -0.09649394
sample estimates:
mean of the differences
 -0.1516129

> wilcox.test(eps$Prov1rutinPK,eps$Prov2rutinPK, alternative =
c("two.sided"),paired=TRUE)

```

#### Wilcoxon signed rank test with continuity correction

```

data: eps$Prov1rutinPK and eps$Prov2rutinPK
V = 0, p-value = 3.92e-05
alternative hypothesis: true location shift is not equal to 0

```

#### Warning messages:

```

1: In wilcox.test.default(eps$Prov1rutinPK, eps$Prov2rutinPK, alternative =
c("two.sided"), :
  cannot compute exact p-value with ties
2: In wilcox.test.default(eps$Prov1rutinPK, eps$Prov2rutinPK, alternative =
c("two.sided"), :
  cannot compute exact p-value with zeroes

>
> #Significance value for pre- to postop change - see t.test or Wilcoxon's.
> text(8,1.45,"P<0.01", cex=2)
>
>
>
>
>
> #Before and after diagrams for APTT

```

```

> preop<-epi$Prov1rutinAPTT
> postop<-epi$Prov2rutinAPTT
> preopdata<-t(matrix(preop))
> postopdata<-t(matrix(postop))
> withdrawaltime<-t(matrix(epi$withdrawaltime))
> meanwithdrawaltime<-mean(epi$withdrawaltime, na.rm=TRUE)
> y<-rbind(preop, postop)
> beforeandafterdata<-rbind(withdrawaltime, preopdata, postopdata)
> beforeandafterdata
      [,1]      [,2]      [,3]      [,4] [,5]      [,6]      [,7]      [,8]
[1,] 11.13194  6.118056  8.145833  3.107639  3.1 10.07292  7.104167  6.100694
[2,] 26.000000      NA 34.000000 34.000000 29.0      NA 26.000000 26.000000
[3,] 30.000000 29.000000 33.000000 29.000000 35.0 32.000000 26.000000 34.000000
      [,9]      [,10]      [,11]      [,12]      [,13]      [,14] [,15]
[1,]  2.201389  5.145833  5.069444 14.09722  5.131944  6.180556  NA
[2,] 24.000000 26.000000 27.000000 24.00000 31.000000 26.000000  26
[3,] 25.000000 25.000000 35.000000 28.00000 30.000000 28.000000  NA
      [,16]      [,17]      [,18]      [,19] [,20]      [,21]      [,22]
[1,]  2.121528  5.194444 15.15278  5.909722  NA  5.111111  4.958333
[2,] 26.000000 30.000000 27.00000 31.000000  25 26.000000 27.000000
[3,] 43.000000 29.000000 26.00000 25.000000  NA 27.000000 30.000000
      [,23]      [,24]      [,25] [,26]      [,27]      [,28] [,29] [,30]
[1,]  5.145833  2.097222  2.180556  NA  5.059028  3.138889  NA  NA
[2,] 25.000000 25.000000      NA  29 24.000000 27.000000  NA  27
[3,] 27.000000 29.000000 28.000000  28 27.000000 32.000000  33  NA
      [,31]      [,32]      [,33]      [,34]      [,35]      [,36]      [,37]
[1,] 11.17361  6.222222  6.180556  7.104167  6.291667  5.027778  7.076389
[2,] 32.00000 22.000000 24.000000      NA 27.000000 24.000000 28.000000
[3,] 29.00000 24.000000 26.000000 25.000000 30.000000 26.000000 43.000000
      [,38]
[1,]  6.097222
[2,] 26.000000
[3,] 30.000000
> ylimits<-c(0.9*(min(preop,postop,na.rm=TRUE)),max(preop,postop, na.rm=TRUE))
> xlimits<-c(0,max(epi$withdrawaltime, na.rm=TRUE))
> xlabel<- "Days after surgery"
> plot(c(0,beforeandafterdata[1,1]),c(beforeandafterdata[2,1],
beforeandafterdata[3,1]),
type="l",col="black",xlim=xlimits,ylim=ylimits,ann=TRUE,axes=TRUE,xlab=xlabel,
main="Individual pre- and postoperative aPTT",ylab="aPTT (s)", cex.main=1.3,
cex.lab=1.4,lwd=1)
>
> for (x in 2:38) {lines(c(0,beforeandafterdata[1,x]),
c(beforeandafterdata[2,x], beforeandafterdata[3,x]), type="l", col="black",
lwd=1)}
>
> #normal range - enter manually!
> lines(c(-.4,-.4), c(28,36), type="l", lwd=6, lty=3)
>
> #Average pre and postoperative values at t=0 and t=mean withdrawal time
> preopmean<-mean(epi$Prov1rutinAPTT, na.rm=TRUE)
> postopmean<-mean(epi$Prov2rutinAPTT, na.rm=TRUE)
> lines(c(0, meanwithdrawaltime), c(preopmean, postopmean), type="l", lwd=6,
lty=4)
>
> t.test(epi$Prov1rutinAPTT,epi$Prov2rutinAPTT, alternative =

```

```
c("two.sided"),paired=TRUE)
```

Paired t-test

```
data: epi$Prov1rutinAPTT and epi$Prov2rutinAPTT
t = -2.8253, df = 29, p-value = 0.008461
alternative hypothesis: true difference in means is not equal to 0
95 percent confidence interval:
 -4.3671924 -0.6994742
sample estimates:
mean of the differences
 -2.533333
```

```
> wilcox.test(epi$Prov1rutinAPTT,epi$Prov2rutinAPTT, alternative =
c("two.sided"),paired=TRUE)
```

Wilcoxon signed rank test with continuity correction

```
data: epi$Prov1rutinAPTT and epi$Prov2rutinAPTT
V = 89.5, p-value = 0.005653
alternative hypothesis: true location shift is not equal to 0
```

Warning messages:

```
1: In wilcox.test.default(epi$Prov1rutinAPTT, epi$Prov2rutinAPTT, alternative =
c("two.sided"), :
cannot compute exact p-value with ties
```

```
2: In wilcox.test.default(epi$Prov1rutinAPTT, epi$Prov2rutinAPTT, alternative =
c("two.sided"), :
cannot compute exact p-value with zeroes
```

```
>
> #Significance value for pre- to postop change - see t.test or Wilcoxon's.
> text(8,35,"P<0.01", cex=2)
```

```
>
>
>
>
>
```

```
> #Before and after diagrams for TPK
```

```
> dev.new(width=5)
> preop<-epi$Prov1rutinTPK
> postop<-epi$Prov2rutinTPK
> preopdata<-t(matrix(preop))
> postopdata<-t(matrix(postop))
> withdrawaltime<-t(matrix(epi$withdrawaltime))
> meanwithdrawaltime<-mean(epi$withdrawaltime, na.rm=TRUE)
> y<-rbind(preop, postop)
> beforeandafterdata<-rbind(withdrawaltime, preopdata, postopdata)
> beforeandafterdata
```

|      | [,1]       | [,2]       | [,3]       | [,4]       | [,5]       | [,6]       | [,7]       |
|------|------------|------------|------------|------------|------------|------------|------------|
| [1,] | 11.13194   | 6.118056   | 8.145833   | 3.107639   | 3.1        | 10.07292   | 7.104167   |
| [2,] | 229.000000 | 224.000000 | 205.000000 | 477.000000 | 105.0      | 202.000000 | 131.000000 |
| [3,] | NA         | 286.000000 | 312.000000 | 657.000000 | 131.0      | NA         | 325.000000 |
|      | [,8]       | [,9]       | [,10]      | [,11]      | [,12]      | [,13]      |            |
| [1,] | 6.100694   | 2.201389   | 5.145833   | 5.069444   | 14.09722   | 5.131944   |            |
| [2,] | 189.000000 | 305.000000 | 145.000000 | 221.000000 | 170.000000 | 169.000000 |            |
| [3,] | 262.000000 | 310.000000 | 162.000000 | 244.000000 | 351.000000 | 142.000000 |            |

```

      [,14] [,15]      [,16]      [,17]      [,18]      [,19] [,20]
[1,]  6.180556      NA  2.121528  5.194444  15.15278  5.909722      NA
[2,] 240.000000    132 269.000000 212.000000 224.000000 142.000000    159
[3,] 273.000000      NA 221.000000 309.000000 864.000000 216.000000      NA
      [,21]      [,22]      [,23]      [,24]      [,25] [,26]      [,27]
[1,]  5.111111  4.958333  5.145833  2.097222  2.180556      NA  5.059028
[2,] 153.000000 221.000000 171.000000 238.000000 237.000000    336 119.000000
[3,] 282.000000 248.000000 177.000000 140.000000 200.000000      NA 134.000000
      [,28] [,29] [,30]      [,31]      [,32]      [,33]      [,34]
[1,]  3.138889      NA      NA  11.17361  6.222222  6.180556  7.104167
[2,] 175.000000    251    293 179.000000 274.000000 194.000000 129.000000
[3,]  35.000000      NA      NA 337.000000 303.000000 280.000000 210.000000
      [,35]      [,36]      [,37]      [,38]
[1,]  6.291667  5.027778  7.076389  6.097222
[2,] 189.000000 196.000000 277.000000 316.000000
[3,] 286.000000 389.000000 370.000000 319.000000
> ylims<-c(0.9*(min(preop,postop,na.rm=TRUE)),max(preop,postop, na.rm=TRUE))
> xlims<-c(0,max(eps$withdrawaltime, na.rm=TRUE))
> xlabel<-"Days after surgery"
> plot(c(0,beforeandafterdata[1,1]),c(beforeandafterdata[2,1],
beforeandafterdata[3,1]),
type="l",col="black",xlim=xlims,ylim=ylims,ann=TRUE,axes=TRUE,xlab=xlabel,
main="Individual pre- and postoperative Plc",ylab="Plc (millions/ml)",
cex.main=1.3, cex.lab=1.4,lwd=1)
>
> for (x in 2:38) {lines(c(0,beforeandafterdata[1,x]),
c(beforeandafterdata[2,x], beforeandafterdata[3,x]), type="l", col="black",
lwd=1)}
>
> #normal range - enter manually!
> lines(c(-.4,-.4), c(145,280), type="l", code=0,lwd=2,lty=3)
Warning message:
In plot.xy(xy.coords(x, y), type = type, ...) :
  "code" is not a graphical parameter
>
> #Average pre and postoperative values at t=0 and t=mean withdrawal time
> preopmean<-mean(eps$Prov1rutinTPK, na.rm=TRUE)
> postopmean<-mean(eps$Prov2rutinTPK, na.rm=TRUE)
> lines(c(0, meanwithdrawaltime), c(preopmean, postopmean), type="l", lwd=6,
lty=4)
>
> t.test(eps$Prov1rutinTPK,eps$Prov2rutinTPK, alternative =
c("two.sided"),paired=TRUE)

```

#### Paired t-test

```

data: eps$Prov1rutinTPK and eps$Prov2rutinTPK
t = -3.0816, df = 30, p-value = 0.004385
alternative hypothesis: true difference in means is not equal to 0
95 percent confidence interval:
 -122.2372 -24.7951
sample estimates:
mean of the differences
 -73.51613

```

```
> wilcox.test(eps$Prov1rutinTPK,eps$Prov2rutinTPK, alternative =
```

```
c("two.sided"),paired=TRUE)
```

Wilcoxon signed rank test with continuity correction

data: epi\$Prov1rutinTPK and epi\$Prov2rutinTPK

V = 80.5, p-value = 0.001065

alternative hypothesis: true location shift is not equal to 0

Warning message:

```
In wilcox.test.default(epi$Prov1rutinTPK, epi$Prov2rutinTPK, alternative =  
c("two.sided"), :
```

```
cannot compute exact p-value with ties
```

```
>
```

```
> #Significance value for pre- to postop change - see t.test or Wilcoxon's.
```

```
> text(8,400,"P<0.01", cex=2)
```

```
>
```

```
>
```

```
> ###Some means and SD's from the data
```

```
> mean(epi$Alb, na.rm=TRUE)
```

```
[1] 36.60714
```

```
> sd(epi$Alb, na.rm=TRUE)
```

```
[1] 3.715227
```

```
>
```

```
> mean(epi$withdrawaltime, na.rm=TRUE)
```

```
[1] 6.180324
```

```
> sd(epi$withdrawaltime, na.rm=TRUE)
```

```
[1] 3.152811
```

```
>
```

```
> mean(epi$soplangd, na.rm=TRUE)
```

```
[1] 10.34211
```

```
> sd(epi$soplangd, na.rm=TRUE)
```

```
[1] 11.75719
```

```
>
```

```
> mean(epi$PEROPbloedning, na.rm=TRUE)
```

```
[1] 661.1111
```

```
> sd(epi$PEROPbloedning, na.rm=TRUE)
```

```
[1] 784.5027
```

```
>
```

```
> mean(epi$Prov1rutinBIL, na.rm=TRUE)
```

```
[1] 14.05263
```

```
> sd(epi$Prov1rutinBIL, na.rm=TRUE)
```

```
[1] 21.78016
```

```
> mean(epi$Prov2rutinBIL, na.rm=TRUE)
```

```
[1] 10.51613
```

```
> sd(epi$Prov2rutinBIL, na.rm=TRUE)
```

```
[1] 16.47801
```

```
> t.test(epi$Prov1rutinBIL, epi$Prov2rutinBIL, alternative =
```

```
c("two.sided"),paired=TRUE)
```

Paired t-test

data: epi\$Prov1rutinBIL and epi\$Prov2rutinBIL

t = 2.5067, df = 30, p-value = 0.01783

alternative hypothesis: true difference in means is not equal to 0

95 percent confidence interval:

0.6634288 6.4978615

```
sample estimates:
mean of the differences
      3.580645
```

```
> wilcox.test(epi$Prov1rutinBIL, epi$Prov2rutinBIL, alternative =
c("two.sided"),paired=TRUE)
```

Wilcoxon signed rank test with continuity correction

```
data: epi$Prov1rutinBIL and epi$Prov2rutinBIL
V = 258.5, p-value = 0.009943
alternative hypothesis: true location shift is not equal to 0
```

Warning messages:

```
1: In wilcox.test.default(epi$Prov1rutinBIL, epi$Prov2rutinBIL, alternative =
c("two.sided"), :
  cannot compute exact p-value with ties
2: In wilcox.test.default(epi$Prov1rutinBIL, epi$Prov2rutinBIL, alternative =
c("two.sided"), :
  cannot compute exact p-value with zeroes
```

```
>
> mean(epi$Prov1rutinGT, na.rm=TRUE)
[1] 1.306757
> sd(epi$Prov1rutinGT, na.rm=TRUE)
[1] 1.997771
> mean(epi$Prov2rutinGT, na.rm=TRUE)
[1] 2.11
> sd(epi$Prov2rutinGT, na.rm=TRUE)
[1] 1.872609
> t.test(epi$Prov1rutinGT, epi$Prov2rutinGT, alternative =
c("two.sided"),paired=TRUE)
```

Paired t-test

```
data: epi$Prov1rutinGT and epi$Prov2rutinGT
t = -2.4204, df = 30, p-value = 0.02177
alternative hypothesis: true difference in means is not equal to 0
95 percent confidence interval:
 -1.6427357 -0.1391998
sample estimates:
mean of the differences
      -0.8909677
```

```
> wilcox.test(epi$Prov1rutinGT, epi$Prov2rutinGT, alternative =
c("two.sided"),paired=TRUE)
```

Wilcoxon signed rank test with continuity correction

```
data: epi$Prov1rutinGT and epi$Prov2rutinGT
V = 95, p-value = 0.004833
alternative hypothesis: true location shift is not equal to 0
```

Warning messages:

```
1: In wilcox.test.default(epi$Prov1rutinGT, epi$Prov2rutinGT, alternative =
c("two.sided"), :
  cannot compute exact p-value with ties
```



```
2: In wilcox.test.default(epi$Prov1rutinGT, epi$Prov2rutinGT, alternative =
c("two.sided"), :
cannot compute exact p-value with zeroes
```

```
>
> mean(epi$Prov1rutinCRP, na.rm=TRUE)
[1] 6.784211
> sd(epi$Prov1rutinCRP, na.rm=TRUE)
[1] 9.436312
> mean(epi$Prov2rutinCRP, na.rm=TRUE)
[1] 91.96667
> sd(epi$Prov2rutinCRP, na.rm=TRUE)
[1] 59.82762
> t.test(epi$Prov1rutinCRP, epi$Prov2rutinCRP, alternative =
c("two.sided"),paired=TRUE)
```

Paired t-test

```
data: epi$Prov1rutinCRP and epi$Prov2rutinCRP
t = -7.5742, df = 29, p-value = 2.38e-08
alternative hypothesis: true difference in means is not equal to 0
95 percent confidence interval:
 -107.688 -61.896
sample estimates:
mean of the differences
      -84.792
```

```
> wilcox.test(epi$Prov1rutinCRP, epi$Prov2rutinCRP, alternative =
c("two.sided"),paired=TRUE)
```

Wilcoxon signed rank test

```
data: epi$Prov1rutinCRP and epi$Prov2rutinCRP
V = 0, p-value = 1.863e-09
alternative hypothesis: true location shift is not equal to 0
```

```
>
> mean(epi$Prov1rutinKREA, na.rm=TRUE)
[1] 73.37838
> sd(epi$Prov1rutinKREA, na.rm=TRUE)
[1] 19.00928
> mean(epi$Prov2rutinKREA, na.rm=TRUE)
[1] 65.22581
> sd(epi$Prov2rutinKREA, na.rm=TRUE)
[1] 18.27149
> t.test(epi$Prov1rutinKREA, epi$Prov2rutinKREA, alternative =
c("two.sided"),paired=TRUE)
```

Paired t-test

```
data: epi$Prov1rutinKREA and epi$Prov2rutinKREA
t = 3.0497, df = 29, p-value = 0.004856
alternative hypothesis: true difference in means is not equal to 0
95 percent confidence interval:
 1.602930 8.130403
sample estimates:
mean of the differences
```

4.866667

```
> wilcox.test(eps$Prov1rutinKREA, eps$Prov2rutinKREA, alternative =  
c("two.sided"),paired=TRUE)
```

Wilcoxon signed rank test with continuity correction

data: eps\$Prov1rutinKREA and eps\$Prov2rutinKREA

V = 318, p-value = 0.009062

alternative hypothesis: true location shift is not equal to 0

Warning messages:

```
1: In wilcox.test.default(eps$Prov1rutinKREA, eps$Prov2rutinKREA, alternative =  
c("two.sided"), :  
cannot compute exact p-value with ties
```

```
2: In wilcox.test.default(eps$Prov1rutinKREA, eps$Prov2rutinKREA, alternative =  
c("two.sided"), :  
cannot compute exact p-value with zeroes
```

```
>  
> mean(eps$PEROPbloedning, na.rm=TRUE)
```

```
[1] 661.1111
```

```
> sd(eps$PEROPbloedning, na.rm=TRUE)
```

```
[1] 784.5027
```

```
>
```

```
> mean(eps$DRAENmaengd, na.rm=TRUE)
```

```
[1] 430.2273
```

```
> sd(eps$DRAENmaengd, na.rm=TRUE)
```

```
[1] 355.2178
```

```
>
```

```
> ###Hb
```

```
> mean(eps$Prov1rutinHB, na.rm=TRUE)
```

```
[1] 119.5
```

```
> sd(eps$Prov1rutinHB, na.rm=TRUE)
```

```
[1] 16.14922
```

```
>
```

```
> mean(eps$Prov2rutinHB, na.rm=TRUE)
```

```
[1] 112.7576
```

```
> sd(eps$Prov2rutinHB, na.rm=TRUE)
```

```
[1] 11.9714
```

```
> min(eps$Prov2rutinHB, na.rm=TRUE)
```

```
[1] 87
```

```
> max(eps$Prov2rutinHB, na.rm=TRUE)
```

```
[1] 147
```

```
>
```

```
> ###Correlations
```

```
> #Correlation between withdrawal time and EXTEM-MCF
```

```
> plot(eps$withdrawaltime, eps$Prov2extemMCF, xlab="Day of epidural  
withdrawal", ylab = "EXTEM-MCF (mm)", abline(lm(eps$Prov2extemMCF~eps  
$withdrawaltime)),cex.main=1.3, cex.lab=1.4, ylim=c(0,80))
```

```
> cor.test(eps$withdrawaltime, eps$Prov2extemMCF, use="complete.obs",  
method="pearson")
```

Pearson's product-moment correlation

data: eps\$withdrawaltime and eps\$Prov2extemMCF

t = 2.9901, df = 31, p-value = 0.005423

```
alternative hypothesis: true correlation is not equal to 0
95 percent confidence interval:
 0.1549956 0.7023547
sample estimates:
      cor
0.4731287
```

```
> cor.test(epi$withdrawaltime, epi$Prov2extemMCF, use="complete.obs",
method="spearman")
```

Spearman's rank correlation rho

```
data: epi$withdrawaltime and epi$Prov2extemMCF
S = 2929, p-value = 0.0024
alternative hypothesis: true rho is not equal to 0
sample estimates:
      rho
0.5105266
```

Warning message:

```
In cor.test.default(epi$withdrawaltime, epi$Prov2extemMCF, use =
"complete.obs", :
  Cannot compute exact p-value with ties
> text(x=12, y=60, "P<0.01", pos=3, cex=2)
> text(x=12, y=55, "r=0.47", pos=3, cex=2)
>
> #Correlation between withdrawal time and FIBTEM-MCF
> plot(epi$withdrawaltime, epi$Prov2fibtemMCF, xlab="Day of epidural
withdrawal", ylab = "FIBTEM-MCF (mm)", abline(lm(epi$Prov2fibtemMCF~epi
$withdrawaltime)),cex.main=1.3, cex.lab=1.4, ylim=c(0,80))
> cor.test(epi$withdrawaltime, epi$Prov2fibtemMCF, use="complete.obs",
method="pearson")
```

Pearson's product-moment correlation

```
data: epi$withdrawaltime and epi$Prov2fibtemMCF
t = 4.3392, df = 31, p-value = 0.0001412
alternative hypothesis: true correlation is not equal to 0
95 percent confidence interval:
 0.3439931 0.7910728
sample estimates:
      cor
0.6147076
```

```
> cor.test(epi$withdrawaltime, epi$Prov2fibtemMCF, use="complete.obs",
method="spearman")
```

Spearman's rank correlation rho

```
data: epi$withdrawaltime and epi$Prov2fibtemMCF
S = 2088.6, p-value = 4.093e-05
alternative hypothesis: true rho is not equal to 0
sample estimates:
      rho
0.6509734
```

Warning message:

```
In cor.test.default(epi$withdrawaltime, epi$Prov2fibtemMCF, use =  
"complete.obs", :
```

```
Cannot compute exact p-value with ties
```

```
> text(x=12, y=70, "P<0.01", pos=3, cex=2)
```

```
> text(x=12, y=65, "r=0.61", pos=3, cex=2)
```

```
>
```

```
> #Correlation between withdrawal time and INTEM-MCF
```

```
> plot(epi$withdrawaltime, epi$Prov2intemMCF, xlab="Day of epidural  
withdrawal", ylab = "INTEM-MCF (mm)", abline(lm(epi$Prov2intemMCF~epi  
$withdrawaltime)),cex.main=1.3, cex.lab=1.4, ylim=c(0,80))
```

```
> cor.test(epi$withdrawaltime, epi$Prov2intemMCF, use="complete.obs",  
method="pearson")
```

Pearson's product-moment correlation

```
data: epi$withdrawaltime and epi$Prov2intemMCF
```

```
t = 2.678, df = 31, p-value = 0.01174
```

```
alternative hypothesis: true correlation is not equal to 0
```

```
95 percent confidence interval:
```

```
0.1058989 0.6761435
```

```
sample estimates:
```

```
cor
```

```
0.4334494
```

```
> cor.test(epi$withdrawaltime, epi$Prov2intemMCF, use="complete.obs",  
method="spearman")
```

Spearman's rank correlation rho

```
data: epi$withdrawaltime and epi$Prov2intemMCF
```

```
S = 1875.2, p-value = 1.023e-05
```

```
alternative hypothesis: true rho is not equal to 0
```

```
sample estimates:
```

```
rho
```

```
0.6866393
```

Warning message:

```
In cor.test.default(epi$withdrawaltime, epi$Prov2intemMCF, use =  
"complete.obs", :
```

```
Cannot compute exact p-value with ties
```

```
> text(x=12, y=60, "P<0.05", pos=3, cex=2)
```

```
> text(x=12, y=55, "r=0.43", pos=3, cex=2)
```

```
>
```

```
> #Correlation between withdrawal time and HEPTM-MCF
```

```
> plot(epi$withdrawaltime, epi$Prov2heptemMCF, xlab="Day of epidural  
withdrawal", ylab = "HEPTM-MCF (mm)", abline(lm(epi$Prov2heptemMCF~epi  
$withdrawaltime)),cex.main=1.3, cex.lab=1.4, ylim=c(0,80))
```

```
> cor.test(epi$withdrawaltime, epi$Prov2heptemMCF, use="complete.obs",  
method="pearson")
```

Pearson's product-moment correlation

```
data: epi$withdrawaltime and epi$Prov2heptemMCF
```

```
t = 2.8901, df = 30, p-value = 0.007092
```

```
alternative hypothesis: true correlation is not equal to 0
```

95 percent confidence interval:

0.1409112 0.7012560

sample estimates:

cor

0.4666751

```
> cor.test(epi$withdrawaltime, epi$Prov2heptemMCF, use="complete.obs",  
method="spearman")
```

Spearman's rank correlation rho

data: epi\$withdrawaltime and epi\$Prov2heptemMCF

S = 2716.7, p-value = 0.003411

alternative hypothesis: true rho is not equal to 0

sample estimates:

rho

0.5020796

Warning message:

```
In cor.test.default(epi$withdrawaltime, epi$Prov2heptemMCF, use =  
"complete.obs", :
```

```
Cannot compute exact p-value with ties
```

```
> text(x=15, y=70, "***", pos=3, cex=2)
```

```
> text(x=12, y=60, "P<0.01", pos=3, cex=2)
```

```
> text(x=12, y=55, "r=0.47", pos=3, cex=2)
```

```
>
```

```
> #Correlation between withdrawal time and Prov2multiplateADP
```

```
> plot(epi$withdrawaltime, epi$Prov2multiplateADP, xlab="Day of epidural  
withdrawal", ylab = "Multiplate-ADP (Area under curve)", abline(lm(epi  
$Prov2heptemMCF~epi$withdrawaltime)),cex.main=1.3, cex.lab=1.4,ylim=c(30,160))
```

```
> cor.test(epi$withdrawaltime, epi$Prov2multiplateADP, use="complete.obs",  
method="pearson")
```

Pearson's product-moment correlation

data: epi\$withdrawaltime and epi\$Prov2multiplateADP

t = 3.6191, df = 31, p-value = 0.00104

alternative hypothesis: true correlation is not equal to 0

95 percent confidence interval:

0.2481091 0.7482973

sample estimates:

cor

0.5449964

```
> cor.test(epi$withdrawaltime, epi$Prov2multiplateADP, use="complete.obs",  
method="spearman")
```

Spearman's rank correlation rho

data: epi\$withdrawaltime and epi\$Prov2multiplateADP

S = 2357.4, p-value = 0.0001855

alternative hypothesis: true rho is not equal to 0

sample estimates:

rho

0.606053

Warning message:

```
In cor.test.default(epi$withdrawaltime, epi$Prov2multiplateADP, :  
  Cannot compute exact p-value with ties  
> text(x=13, y=60, "P<0.01", pos=3, cex=2)  
> text(x=13, y=50, "r=0.54", pos=3, cex=2)  
>  
>  
> #Correlation between withdrawal time and Prov2multiplateCOL  
> plot(epi$withdrawaltime, epi$Prov2multiplateCOL, xlab="Day of epidural  
withdrawal", ylab = "Multiplate-COL (Area under curve)", abline(lm(epi  
$Prov2multiplateCOL~epi$withdrawaltime)),cex.main=1.3,  
cex.lab=1.4,ylim=c(30,160))  
> cor.test(epi$withdrawaltime, epi$Prov2multiplateCOL, use="complete.obs",  
method="pearson")
```

Pearson's product-moment correlation

```
data: epi$withdrawaltime and epi$Prov2multiplateCOL  
t = 4.3567, df = 31, p-value = 0.0001344  
alternative hypothesis: true correlation is not equal to 0  
95 percent confidence interval:  
 0.3461759 0.7919982  
sample estimates:  
 cor  
0.6162468
```

```
> cor.test(epi$withdrawaltime, epi$Prov2multiplateCOL, use="complete.obs",  
method="spearman")
```

Spearman's rank correlation rho

```
data: epi$withdrawaltime and epi$Prov2multiplateCOL  
S = 2142.8, p-value = 5.659e-05  
alternative hypothesis: true rho is not equal to 0  
sample estimates:  
 rho  
0.6419196
```

Warning message:

```
In cor.test.default(epi$withdrawaltime, epi$Prov2multiplateCOL, :  
  Cannot compute exact p-value with ties  
> text(x=13, y=60, "P<0.01", pos=3, cex=2)  
> text(x=13, y=50, "r=0.61", pos=3, cex=2)  
>  
> #Correlation between withdrawal time and Prov2multiplateTRAP  
> plot(epi$withdrawaltime, epi$Prov2multiplateCOL, xlab="Day of epidural  
withdrawal", ylab = "Multiplate-TRAP (Area under curve)", abline(lm(epi  
$Prov2multiplateTRAP~epi$withdrawaltime)),cex.main=1.3,  
cex.lab=1.4,ylim=c(30,160))  
> cor.test(epi$withdrawaltime, epi$Prov2multiplateTRAP, use="complete.obs",  
method="pearson")
```

Pearson's product-moment correlation

```
data: epi$withdrawaltime and epi$Prov2multiplateTRAP  
t = 3.5038, df = 31, p-value = 0.001419
```

alternative hypothesis: true correlation is not equal to 0  
95 percent confidence interval:

0.2316643 0.7405179

sample estimates:

cor

0.5326132

```
> cor.test(emi$withdrawaltime, emi$Prov2multiplateTRAP, use="complete.obs",  
method="spearman")
```

Spearman's rank correlation rho

data: emi\$withdrawaltime and emi\$Prov2multiplateTRAP

S = 2114.2, p-value = 4.777e-05

alternative hypothesis: true rho is not equal to 0

sample estimates:

rho

0.6466901

Warning message:

```
In cor.test.default(emi$withdrawaltime, emi$Prov2multiplateTRAP, :
```

```
Cannot compute exact p-value with ties
```

```
> text(x=13, y=60, "P<0.01", pos=3, cex=2)
```

```
> text(x=13, y=50, "r=0.53", pos=3, cex=2)
```

```
>
```

```
> #Correlation between withdrawal time and Prov2multiplateASPI
```

```
> plot(emi$withdrawaltime, emi$Prov2multiplateCOL, xlab="Day of epidural  
withdrawal", ylab = "Multiplate-ASPI (Area under curve)", abline(lm(emi  
$Prov2multiplateASPI~emi$withdrawaltime)),cex.main=1.3,  
cex.lab=1.4,ylim=c(30,160))
```

```
> cor.test(emi$withdrawaltime, emi$Prov2multiplateASPI, use="complete.obs",  
method="pearson")
```

Pearson's product-moment correlation

data: emi\$withdrawaltime and emi\$Prov2multiplateASPI

t = 4.3702, df = 31, p-value = 0.0001293

alternative hypothesis: true correlation is not equal to 0

95 percent confidence interval:

0.3478537 0.7927082

sample estimates:

cor

0.6174285

```
> cor.test(emi$withdrawaltime, emi$Prov2multiplateASPI, use="complete.obs",  
method="spearman")
```

Spearman's rank correlation rho

data: emi\$withdrawaltime and emi\$Prov2multiplateASPI

S = 1882.3, p-value = 1.075e-05

alternative hypothesis: true rho is not equal to 0

sample estimates:

rho

0.6854468

Warning message:

```
In cor.test.default(epi$withdrawaltime, epi$Prov2multiplateASPI, :
```

```
Cannot compute exact p-value with ties
```

```
> text(x=13, y=60, "P<0.01", pos=3, cex=2)
```

```
> text(x=13, y=50, "r=0.61", pos=3, cex=2)
```

```
>
```

```
> #Correlation between Plc and multiplate ADP
```

```
> dev.new(width=5)
```

```
> plot(epi$Prov2rutinTPK, epi$Prov2multiplateADP,main="Multiplate ADP AUC vs  
Plc", xlab="Platelet count (millions/mL)", ylab = "Multiplate-ADP (Area under  
curve)", abline(lm(epi$Prov2multiplateADP~epi$Prov2rutinTPK)),cex.main=1.3,  
cex.lab=1.4,ylim=c(30,160))
```

```
> cor.test(epi$Prov2rutinTPK, epi$Prov2multiplateADP, use="complete.obs",  
method="pearson")
```

Pearson's product-moment correlation

```
data: epi$Prov2rutinTPK and epi$Prov2multiplateADP
```

```
t = 4.0675, df = 29, p-value = 0.0003329
```

```
alternative hypothesis: true correlation is not equal to 0
```

```
95 percent confidence interval:
```

```
0.3158253 0.7886309
```

```
sample estimates:
```

```
cor
```

```
0.6027158
```

```
> cor.test(epi$Prov2rutinTPK, epi$Prov2multiplateADP, use="complete.obs",  
method="spearman")
```

Spearman's rank correlation rho

```
data: epi$Prov2rutinTPK and epi$Prov2multiplateADP
```

```
S = 2328.7, p-value = 0.00214
```

```
alternative hypothesis: true rho is not equal to 0
```

```
sample estimates:
```

```
rho
```

```
0.5305094
```

Warning message:

```
In cor.test.default(epi$Prov2rutinTPK, epi$Prov2multiplateADP, use =  
"complete.obs", :
```

```
Cannot compute exact p-value with ties
```

```
> text(x=700, y=80, "P<0.01", pos=3, cex=2)
```

```
> text(x=700, y=70, "r=0.60", pos=3, cex=2)
```

```
> arrows(50,57,,113,code=0,lwd=2,lty=3)
```

```
>
```

```
>
```

```
>
```

```
> #Correlation between Plc and multiplate COL
```

```
> plot(epi$Prov2rutinTPK, epi$Prov2multiplateCOL, xlab="Platelet count  
(millions/mL)", ylab = "Multiplate-COL (Area under curve)", abline(lm(epi  
$Prov2multiplateCOL~epi$Prov2rutinTPK)),cex.main=1.3,  
cex.lab=1.4,ylim=c(30,160))
```

```
> cor.test(epi$Prov2rutinTPK, epi$Prov2multiplateCOL, use="complete.obs",  
method="pearson")
```



Pearson's product-moment correlation

```
data: epi$Prov2rutinTPK and epi$Prov2multiplateCOL
t = 5.9174, df = 29, p-value = 1.998e-06
alternative hypothesis: true correlation is not equal to 0
95 percent confidence interval:
 0.5220598 0.8667749
sample estimates:
      cor
0.7395863
```

```
> cor.test(epi$Prov2rutinTPK, epi$Prov2multiplateCOL, use="complete.obs",
method="spearman")
```

Spearman's rank correlation rho

```
data: epi$Prov2rutinTPK and epi$Prov2multiplateCOL
S = 1362.2, p-value = 3.902e-06
alternative hypothesis: true rho is not equal to 0
sample estimates:
      rho
0.7253656
```

Warning message:

```
In cor.test.default(epi$Prov2rutinTPK, epi$Prov2multiplateCOL, use =
"complete.obs", :
```

```
Cannot compute exact p-value with ties
```

```
> text(x=700, y=100, "P<0.01", pos=3, cex=2)
```

```
> text(x=700, y=90, "r=0.74", pos=3, cex=2)
```

```
>
```

```
> #Correlation between Plc and multiplate TRAP
```

```
> plot(epi$Prov2rutinTPK, epi$Prov2multiplateTRAP, xlab="Platelet count
(millions/mL)", ylab = "Multiplate-TRAP (Area under curve)", abline(lm(epi
$Prov2multiplateTRAP~epi$Prov2rutinTPK)),cex.main=1.3,
cex.lab=1.4,ylim=c(30,160))
```

```
> cor.test(epi$Prov2rutinTPK, epi$Prov2multiplateTRAP, use="complete.obs",
method="pearson")
```

Pearson's product-moment correlation

```
data: epi$Prov2rutinTPK and epi$Prov2multiplateTRAP
t = 4.1616, df = 29, p-value = 0.0002575
alternative hypothesis: true correlation is not equal to 0
95 percent confidence interval:
 0.3282701 0.7938231
sample estimates:
      cor
0.611483
```

```
> cor.test(epi$Prov2rutinTPK, epi$Prov2multiplateTRAP, use="complete.obs",
method="spearman")
```

Spearman's rank correlation rho

```
data: epi$Prov2rutinTPK and epi$Prov2multiplateTRAP
S = 1792.7, p-value = 0.0001108
```

```
alternative hypothesis: true rho is not equal to 0
sample estimates:
      rho
0.6385724
```

Warning message:

```
In cor.test.default(epi$Prov2rutinTPK, epi$Prov2multiplateTRAP, :
  Cannot compute exact p-value with ties
> text(x=700, y=100, "P<0.01", pos=3, cex=2)
> text(x=700, y=90, "r=0.61", pos=3, cex=2)
>
>
> #Correlation between Plc and multiplate ASPI
> plot(epi$Prov2rutinTPK, epi$Prov2multiplateASPI, xlab="Platelet count
(millions/mL)", ylab = "Multiplate-ASPI (Area under curve)", abline(lm(epi
$Prov2multiplateASPI~epi$Prov2rutinTPK)),cex.main=1.3,
cex.lab=1.4,ylim=c(30,160))
> cor.test(epi$Prov2rutinTPK, epi$Prov2multiplateASPI, use="complete.obs",
method="pearson")
```

Pearson's product-moment correlation

```
data: epi$Prov2rutinTPK and epi$Prov2multiplateASPI
t = 4.2389, df = 29, p-value = 0.0002084
alternative hypothesis: true correlation is not equal to 0
95 percent confidence interval:
 0.3383307 0.7979716
sample estimates:
      cor
0.6185201
```

```
> cor.test(epi$Prov2rutinTPK, epi$Prov2multiplateASPI, use="complete.obs",
method="spearman")
```

Spearman's rank correlation rho

```
data: epi$Prov2rutinTPK and epi$Prov2multiplateASPI
S = 1444.9, p-value = 8.137e-06
alternative hypothesis: true rho is not equal to 0
sample estimates:
      rho
0.7086821
```

Warning message:

```
In cor.test.default(epi$Prov2rutinTPK, epi$Prov2multiplateASPI, :
  Cannot compute exact p-value with ties
> text(x=700, y=100, "P<0.01", pos=3, cex=2)
> text(x=700, y=90, "r=0.62", pos=3, cex=2)
>
>
> #Correlation between d-dimer and FIBTEM-Li60
> plot(epi$DDpostop, epi$Prov2fibtemLI60, xlab="Postoperative d-dimer (mg/L)",
ylab = "FIBTEM-Li60", abline(lm(epi$Prov2fibtemLI60 ~epi
$DDpostop)),cex.main=1.3, cex.lab=1.4)
> cor.test(epi$DDpostop, epi$Prov2fibtemLI60, use="complete.obs",
method="pearson")
```

Pearson's product-moment correlation

```
data: epi$DDpostop and epi$Prov2fibtemLI60
t = -3.6528, df = 28, p-value = 0.001057
alternative hypothesis: true correlation is not equal to 0
95 percent confidence interval:
 -0.7706403 -0.2613083
sample estimates:
      cor
-0.5680962
```

```
> cor.test(epi$DDpostop, epi$Prov2fibtemLI60, use="complete.obs",
method="spearman")
```

Spearman's rank correlation rho

```
data: epi$DDpostop and epi$Prov2fibtemLI60
S = 6870.7, p-value = 0.002678
alternative hypothesis: true rho is not equal to 0
sample estimates:
      rho
-0.5285284
```

Warning message:

```
In cor.test.default(epi$DDpostop, epi$Prov2fibtemLI60, use = "complete.obs", :
  Cannot compute exact p-value with ties
```

```
>
> text(x=4.5, y=98, "P<0.01", pos=3, cex=2)
> text(x=4.5, y=97, "r=-0.56", pos=3, cex=2)
>
> #Correlation between d-dimer and EXTEM-Li60
> plot(epi$DDpostop, epi$Prov2extemLI60, xlab="Postoperative d-dimer", ylab =
"EXTEM-Li60", abline(lm(epi$Prov2extemLI60 ~epi$DDpostop)),cex.main=1.3,
cex.lab=1.4)
> cor.test(epi$DDpostop, epi$Prov2extemLI60, use="complete.obs",
method="pearson")
```

Pearson's product-moment correlation

```
data: epi$DDpostop and epi$Prov2extemLI60
t = -1.8044, df = 29, p-value = 0.08157
alternative hypothesis: true correlation is not equal to 0
95 percent confidence interval:
 -0.60404504 0.04128158
sample estimates:
      cor
-0.3177058
```

```
> cor.test(epi$DDpostop, epi$Prov2extemLI60, use="complete.obs",
method="spearman")
```

Spearman's rank correlation rho

```
data: epi$DDpostop and epi$Prov2extemLI60
S = 5277.7, p-value = 0.7321
```

```
alternative hypothesis: true rho is not equal to 0
sample estimates:
      rho
-0.06405276
```

Warning message:

```
In cor.test.default(epi$DDpostop, epi$Prov2extemLI60, use = "complete.obs", :
  Cannot compute exact p-value with ties
> text(x=4.5, y=93, "N/S", pos=3, cex=2)
>
> #Correlation between d-dimer and INTEM-Li60
> plot(epi$DDpostop, epi$Prov2intemLI60, xlab="Postoperative d-dimer", ylab =
"INTEM-Li60", abline(lm(epi$Prov2intemLI60 ~epi$DDpostop)),cex.main=1.3,
cex.lab=1.4)
> cor.test(epi$DDpostop, epi$Prov2intemLI60, use="complete.obs",
method="pearson")
```

Pearson's product-moment correlation

```
data: epi$DDpostop and epi$Prov2intemLI60
t = 0.8787, df = 26, p-value = 0.3876
alternative hypothesis: true correlation is not equal to 0
95 percent confidence interval:
 -0.2170022  0.5105531
sample estimates:
      cor
0.1698233
```

```
> cor.test(epi$DDpostop, epi$Prov2intemLI60, use="complete.obs",
method="spearman")
```

Spearman's rank correlation rho

```
data: epi$DDpostop and epi$Prov2intemLI60
S = 2773, p-value = 0.2165
alternative hypothesis: true rho is not equal to 0
sample estimates:
      rho
0.2410964
```

Warning message:

```
In cor.test.default(epi$DDpostop, epi$Prov2intemLI60, use = "complete.obs", :
  Cannot compute exact p-value with ties
> text(x=4.5, y=93, "N/S", pos=3, cex=2)
>
> #Correlation between withdrawal time and D-Dimer
> plot(epi$withdrawaltime, epi$DDpostop, xlab="Day of epidural withdrawal",
ylab = "D-dimer", abline(lm(epi$DDpostop~epi$withdrawaltime)),cex.main=1.3,
cex.lab=1.4)
> cor.test(epi$withdrawaltime, epi$DDpostop, use="complete.obs",
method="pearson")
```

Pearson's product-moment correlation

```
data: epi$withdrawaltime and epi$DDpostop
t = 2.6428, df = 29, p-value = 0.01312
```

```
alternative hypothesis: true correlation is not equal to 0
95 percent confidence interval:
 0.1021768 0.6875695
sample estimates:
      cor
0.440566
```

```
> cor.test(epi$withdrawaltime, epi$DDpostop, use="complete.obs",
method="spearman")
```

Spearman's rank correlation rho

```
data: epi$withdrawaltime and epi$DDpostop
S = 3224.5, p-value = 0.05365
alternative hypothesis: true rho is not equal to 0
sample estimates:
      rho
0.3499042
```

Warning message:

```
In cor.test.default(epi$withdrawaltime, epi$DDpostop, use = "complete.obs", :
  Cannot compute exact p-value with ties
> text(x=13, y=5, "P=0.05", pos=3, cex=2)
> text(x=13, y=4.5, "rho=0.34", pos=3, cex=2)
>
> hist(epi$DDpostop)
> hist(epi$Prov2fibtemLI60)
>
> #Correlation between withdrawal time and Fibtem-Li60
> plot(epi$withdrawaltime, epi$Prov2fibtemLI60, xlab="Day of epidural
withdrawal", ylab = "FIBTEM-Li60", abline(lm(epi$Prov2fibtemLI60~epi
$withdrawaltime)),cex.main=1.3, cex.lab=1.4)
> cor.test(epi$withdrawaltime, epi$Prov2fibtemLI60, use="complete.obs",
method="pearson")
```

Pearson's product-moment correlation

```
data: epi$withdrawaltime and epi$Prov2fibtemLI60
t = -4.9153, df = 30, p-value = 2.959e-05
alternative hypothesis: true correlation is not equal to 0
95 percent confidence interval:
 -0.8245592 -0.4161145
sample estimates:
      cor
-0.6678986
```

```
> cor.test(epi$withdrawaltime, epi$Prov2fibtemLI60, use="complete.obs",
method="spearman")
```

Spearman's rank correlation rho

```
data: epi$withdrawaltime and epi$Prov2fibtemLI60
S = 9239.1, p-value = 1.085e-05
alternative hypothesis: true rho is not equal to 0
sample estimates:
      rho
```

-0.6933778

Warning message:

```
In cor.test.default(epi$withdrawaltime, epi$Prov2fibtemLI60, use =  
"complete.obs", :
```

```
Cannot compute exact p-value with ties
```

```
> text(x=13, y=5, "P<0.01", pos=3, cex=2)
```

```
> text(x=13, y=4.5, "r=-0.67", pos=3, cex=2)
```

```
>
```

```
>
```

```
> #Correlation between withdrawal time and CRP
```

```
> plot(epi$withdrawaltime, epi$Prov2rutinCRP, xlab="Day of epidural  
withdrawal", ylab = "CRP", abline(lm(epi$Prov2rutinCRP~epi  
$withdrawaltime)),cex.main=1.3, cex.lab=1.4)
```

```
> cor.test(epi$withdrawaltime, epi$Prov2rutinCRP, use="complete.obs",  
method="pearson")
```

Pearson's product-moment correlation

data: epi\$withdrawaltime and epi\$Prov2rutinCRP

t = -1.6047, df = 28, p-value = 0.1198

alternative hypothesis: true correlation is not equal to 0

95 percent confidence interval:

-0.58890747 0.07823845

sample estimates:

cor

-0.2902109

```
> cor.test(epi$withdrawaltime, epi$Prov2rutinCRP, use="complete.obs",  
method="spearman")
```

Spearman's rank correlation rho

data: epi\$withdrawaltime and epi\$Prov2rutinCRP

S = 5519.1, p-value = 0.226

alternative hypothesis: true rho is not equal to 0

sample estimates:

rho

-0.2278242

Warning message:

```
In cor.test.default(epi$withdrawaltime, epi$Prov2rutinCRP, use =  
"complete.obs", :
```

```
Cannot compute exact p-value with ties
```

```
> text(x=13, y=150, "N/S", pos=3, cex=2)
```

```
>
```

```
> #Correlation between DDimer and CRP
```

```
> plot(epi$Prov2rutinCRP, epi$DDpostop, xlab="CRP", ylab = "D-dimer",  
abline(lm(epi$DDpostop~epi$Prov2rutinCRP)),cex.main=1.3, cex.lab=1.4,  
xlim=c(0,200), ylim=c(0,4))
```

```
> cor.test(epi$DDpostop, epi$Prov2rutinCRP, use="complete.obs",  
method="pearson")
```

Pearson's product-moment correlation

data: epi\$DDpostop and epi\$Prov2rutinCRP

```
t = 1.6004, df = 26, p-value = 0.1216
alternative hypothesis: true correlation is not equal to 0
95 percent confidence interval:
 -0.08287968  0.60494847
sample estimates:
      cor
0.2994566
```

```
> cor.test(eps$withdrawaltime, eps$Prov2rutinCRP, use="complete.obs",
method="spearman")
```

Spearman's rank correlation rho

```
data: eps$withdrawaltime and eps$Prov2rutinCRP
S = 5519.1, p-value = 0.226
alternative hypothesis: true rho is not equal to 0
sample estimates:
      rho
-0.2278242
```

Warning message:

```
In cor.test.default(eps$withdrawaltime, eps$Prov2rutinCRP, use =
"complete.obs", :
```

```
Cannot compute exact p-value with ties
```

```
> text(x=160, y=1.5, "N/S", pos=3, cex=2)
```

```
>
```

```
> ##Calculation of liver tests
```

```
> boxplot(main="Bilirubin",eps$Prov1rutinBIL,eps$Prov2rutinBIL)
```

```
> mean(eps$Prov1rutinBIL, na.rm=TRUE)
```

```
[1] 14.05263
```

```
> sd(eps$Prov1rutinBIL, na.rm=TRUE)
```

```
[1] 21.78016
```

```
> mean(eps$Prov2rutinBIL, na.rm=TRUE)
```

```
[1] 10.51613
```

```
> sd(eps$Prov2rutinBIL, na.rm=TRUE)
```

```
[1] 16.47801
```

```
> t.test(eps$Prov1rutinBIL,eps$Prov2rutinBIL,alternative =
c("two.sided"),paired = TRUE)
```

Paired t-test

```
data: eps$Prov1rutinBIL and eps$Prov2rutinBIL
t = 2.5067, df = 30, p-value = 0.01783
alternative hypothesis: true difference in means is not equal to 0
95 percent confidence interval:
 0.6634288 6.4978615
sample estimates:
mean of the differences
      3.580645
```

```
> wilcox.test(eps$Prov1rutinBIL,eps$Prov2rutinBIL,alternative =
c("two.sided"),paired = TRUE)
```

Wilcoxon signed rank test with continuity correction

```
data: eps$Prov1rutinBIL and eps$Prov2rutinBIL
```

V = 258.5, p-value = 0.009943  
alternative hypothesis: true location shift is not equal to 0

Warning messages:

1: In wilcox.test.default(emi\$Prov1rutinBIL, emi\$Prov2rutinBIL, alternative = c("two.sided"), :  
cannot compute exact p-value with ties

2: In wilcox.test.default(emi\$Prov1rutinBIL, emi\$Prov2rutinBIL, alternative = c("two.sided"), :  
cannot compute exact p-value with zeroes

```
>
> boxplot(main="ALP",emi$Prov1rutinALP,emi$Prov2rutinALP)
> mean(emi$Prov1rutinALP, na.rm=TRUE)
[1] 1.64
> sd(emi$Prov1rutinALP, na.rm=TRUE)
[1] 1.045347
> mean(emi$Prov2rutinALP, na.rm=TRUE)
[1] 2.297813
> sd(emi$Prov2rutinALP, na.rm=TRUE)
[1] 1.302295
> t.test(emi$Prov1rutinALP,emi$Prov2rutinALP,alternative =
c("two.sided"),paired = TRUE)
```

Paired t-test

data: emi\$Prov1rutinALP and emi\$Prov2rutinALP  
t = -2.6637, df = 31, p-value = 0.01215  
alternative hypothesis: true difference in means is not equal to 0  
95 percent confidence interval:  
-1.1410564 -0.1514436  
sample estimates:  
mean of the differences  
-0.64625

```
> wilcox.test(emi$Prov1rutinALP,emi$Prov2rutinALP,alternative =
c("two.sided"),paired = TRUE)
```

Wilcoxon signed rank test with continuity correction

data: emi\$Prov1rutinALP and emi\$Prov2rutinALP  
V = 116, p-value = 0.009961  
alternative hypothesis: true location shift is not equal to 0

Warning messages:

1: In wilcox.test.default(emi\$Prov1rutinALP, emi\$Prov2rutinALP, alternative = c("two.sided"), :  
cannot compute exact p-value with ties

2: In wilcox.test.default(emi\$Prov1rutinALP, emi\$Prov2rutinALP, alternative = c("two.sided"), :  
cannot compute exact p-value with zeroes

```
>
>
> ###Diagrams for advanced tests 140520
>
>
> ###Boxplot coagulation factors
```



```

> dev.new(width=3)
> boxplot(main="Fibrinogen",epi$FIBpreop,epi$FIBpostop,horizontal=FALSE,
na.rm=TRUE, axes=TRUE,cex.main=1.65,cex.axis=1.5,cex.lab=1.45, ylab="Fibrinogen
concentration (g/L)", boxwex=1, col=c(24,0), lty=1,ylim=c(0,8), xlim=c(0,2.5))
> arrows(0.25,2,,4,code=0,lwd=2,lty=3)
> my.legend.size <-legend(0.2,1, c("Preoperative","Postoperative"), cex=
1,fill=c(24,0),plot=FALSE)
> my.legend.size
$rect
$rect$w
[1] 2.322804

$rect$h
[1] 1.004651

$rect$left
[1] 0.2

$rect$top
[1] 1

$text
$text$x
[1] 0.8443182 0.8443182

$text$y
[1] 0.6651163 0.3302326

> legend((2.5-my.legend.size$rect$w)/2,1, c("Preoperative","Postoperative"),
cex= 1,fill=c(24,0))
> mean(epi$FIBpreop, na.rm=TRUE)
[1] 3.159189
> sd(epi$FIBpreop, na.rm=TRUE)
[1] 0.941389
> mean(epi$FIBpostop, na.rm=TRUE)
[1] 5.84129
> sd(epi$FIBpostop, na.rm=TRUE)
[1] 1.08464
>
>
> #hist(epi$FIBpreop)
> #hist(epi$FIBpostop)
>
> t.test(epi$FIBpreop,epi$FIBpostop,alternative = c("two.sided"),paired = TRUE)

```

#### Paired t-test

```

data: epi$FIBpreop and epi$FIBpostop
t = -11.345, df = 30, p-value = 2.239e-12
alternative hypothesis: true difference in means is not equal to 0
95 percent confidence interval:
 -3.081371 -2.141210
sample estimates:
mean of the differences

```

-2.61129

```
> wilcox.test(epi$FIBpreop,epi$FIBpostop,alternative = c("two.sided"),paired = TRUE)
```

Wilcoxon signed rank test with continuity correction

data: epi\$FIBpreop and epi\$FIBpostop

V = 3, p-value = 1.656e-06

alternative hypothesis: true location shift is not equal to 0

Warning message:

```
In wilcox.test.default(epi$FIBpreop, epi$FIBpostop, alternative = c("two.sided"), :
```

```
cannot compute exact p-value with ties
```

```
> x<-1
```

```
> y<-1.5
```

```
> arrows(x,y,x+1,y, length=0.05, angle=90, code=1)
```

```
> arrows(x,y,x+1,y, length=0.05, angle=90, code=2)
```

```
> text(x+0.5,y-0.6,"**",pos=3, cex=1.4)
```

```
>
```

```
>
```

```
> boxplot(epi$F2preop,epi$F2postop,-100, epi$F7preop,epi$F7postop,-100, epi$F9preop,epi$F9postop,-100, epi$F10preop,epi$F10postop,-100, epi$F11preop,epi$F11postop,-100, epi$F12preop,epi$F12postop,-100, epi$F13preop,epi$F13postop, horizontal=FALSE, na.rm=TRUE, axes=TRUE, main="Pre- and postoperative concentrations of coagulation factors",cex.main=1.65,cex.axis=1.5,cex.lab=1.45, ylab="Plasma concentration (kIE/L)", boxwex=1, col=c(24,0,0,24,0,0,24,0,0,24,0,0,24,0,0,24,0,0,24,0,0,24,0,0,24,0,0,24,0,0), lty=1,ylim=c(0.3,2.9), names=c("F", "2", "", "F", "7", "", "F", "9", "", "F", "10", "", "F", "11", "", "F", "12", "", "F", "13"))
```

```
> legend(0,2.8, c("Preoperative","Postoperative"), cex= 1,fill=c(24,0))
```

```
> legend(5.7,5,lty=3,lwd=2,c("Reference range"))
```

```
> arrows(0.4,0.7,,1.5,code=0,lwd=2,lty=3)
```

```
> arrows(3.4,0.6,,1.6,code=0,lwd=2,lty=3)
```

```
> arrows(6.4,0.7,,1.3,code=0,lwd=2,lty=3)
```

```
> arrows(9.4,0.7,,1.52,code=0,lwd=2,lty=3)
```

```
> arrows(12.4,0.6,,1.3,code=0,lwd=2,lty=3)
```

```
> arrows(15.4,1.07,,1.5,code=0,lwd=2,lty=3)
```

```
> arrows(18.4,0.7,,1.4,code=0,lwd=2,lty=3)
```

```
>
```

```
>
```

```
>
```

```
> #hist(epi$F2preop)
```

```
> mean(epi$F2preop, na.rm=TRUE)
```

```
[1] 1.0395
```

```
> sd(epi$F2preop, na.rm=TRUE)
```

```
[1] 0.1941889
```

```
>
```

```
> #hist(epi$F2postop)
```

```
> mean(epi$F2postop, na.rm=TRUE)
```

```
[1] 1.038968
```

```
> sd(epi$F2postop, na.rm=TRUE)
```

```
[1] 0.2792906
```

```
>
```

```
> t.test(epi$F2preop, epi$F2postop, alternative = c("two.sided"), paired = TRUE)
```

Paired t-test

```
data: epi$F2preop and epi$F2postop
t = -0.57852, df = 30, p-value = 0.5672
alternative hypothesis: true difference in means is not equal to 0
95 percent confidence interval:
 -0.13751286  0.07680318
sample estimates:
mean of the differences
      -0.03035484
```

```
> wilcox.test(epi$F2preop, epi$F2postop, alternative = c("two.sided"), paired = TRUE)
```

Wilcoxon signed rank test

```
data: epi$F2preop and epi$F2postop
V = 224, p-value = 0.6496
alternative hypothesis: true location shift is not equal to 0
```

```
>
> hist(epi$F7preop)
> mean(epi$F7preop, na.rm=TRUE)
[1] 1.101763
> sd(epi$F7preop, na.rm=TRUE)
[1] 0.2338181
>
> #hist(epi$F7postop)
> mean(epi$F7postop, na.rm=TRUE)
[1] 1.003161
> sd(epi$F7postop, na.rm=TRUE)
[1] 0.2336632
>
> t.test(epi$F7preop, epi$F7postop, alternative = c("two.sided"), paired = TRUE)
```

Paired t-test

```
data: epi$F7preop and epi$F7postop
t = 1.8705, df = 30, p-value = 0.0712
alternative hypothesis: true difference in means is not equal to 0
95 percent confidence interval:
 -0.00623686  0.14204331
sample estimates:
mean of the differences
      0.06790323
```

```
> wilcox.test(epi$F7preop, epi$F7postop, alternative = c("two.sided"), paired = TRUE)
```

Wilcoxon signed rank test

```
data: epi$F7preop and epi$F7postop
V = 323, p-value = 0.1461
alternative hypothesis: true location shift is not equal to 0
```

```

> #N/S
> x<-1
> y<-85
> arrows(x,y,x+1,y, length=0.05, angle=90, code=1)
> arrows(x,y,x+1,y, length=0.05, angle=90, code=2)
> text(x+0.5,y-3,"**",pos=3, cex=1.4)
>
> #hist(epi$F9preop)
> mean(epi$F9preop, na.rm=TRUE)
[1] 1.075526
> sd(epi$F9preop, na.rm=TRUE)
[1] 0.258687
>
> #hist(epi$F9postop)
> mean(epi$F9postop, na.rm=TRUE)
[1] 1.522516
> sd(epi$F9postop, na.rm=TRUE)
[1] 0.3873196
>
> t.test(epi$F9preop, epi$F9postop,alternative = c("two.sided"),paired = TRUE)

```

#### Paired t-test

```

data: epi$F9preop and epi$F9postop
t = -6.5032, df = 30, p-value = 3.448e-07
alternative hypothesis: true difference in means is not equal to 0
95 percent confidence interval:
 -0.6060707 -0.3163809
sample estimates:
mean of the differences
 -0.4612258

```

```

> wilcox.test(epi$F9preop, epi$F9postop,alternative = c("two.sided"),paired = TRUE)

```

#### Wilcoxon signed rank test

```

data: epi$F9preop and epi$F9postop
V = 22, p-value = 4.992e-07
alternative hypothesis: true location shift is not equal to 0

```

```

> x<-7
> y<-2.7
> arrows(x,y,x+1,y, length=0.05, angle=90, code=1)
> arrows(x,y,x+1,y, length=0.05, angle=90, code=2)
> text(x+0.5,y-0.1,"**",pos=3, cex=1.4)
>
> #hist(epi$F10preop)
> mean(epi$F10preop, na.rm=TRUE)
[1] 0.8509737
> sd(epi$F10preop, na.rm=TRUE)
[1] 0.1776195
>
> #hist(epi$F10postop)
> mean(epi$F10postop, na.rm=TRUE)

```

```
[1] 0.9247742
> sd(epi$F10postop, na.rm=TRUE)
[1] 0.2636621
>
> t.test(epi$F10preop, epi$F10postop, alternative = c("two.sided"), paired =
TRUE)
```

Paired t-test

```
data: epi$F10preop and epi$F10postop
t = -2.0785, df = 30, p-value = 0.04631
alternative hypothesis: true difference in means is not equal to 0
95 percent confidence interval:
 -0.163017255 -0.001434358
sample estimates:
mean of the differences
 -0.08222581
```

```
> wilcox.test(epi$F10preop, epi$F10postop, alternative = c("two.sided"), paired =
TRUE)
```

Wilcoxon signed rank test with continuity correction

```
data: epi$F10preop and epi$F10postop
V = 146, p-value = 0.04669
alternative hypothesis: true location shift is not equal to 0
```

Warning message:

```
In wilcox.test.default(epi$F10preop, epi$F10postop, alternative =
c("two.sided"), :
cannot compute exact p-value with ties
```

```
> x<-10
> y<-2.7
> arrows(x,y,x+1,y, length=0.05, angle=90, code=1)
> arrows(x,y,x+1,y, length=0.05, angle=90, code=2)
> text(x+0.5,y-0.1,"*",pos=3, cex=1.4)
>
> #hist(epi$F11preop)
> mean(epi$F11preop, na.rm=TRUE)
[1] 1.023395
> sd(epi$F11preop, na.rm=TRUE)
[1] 0.2127542
>
> #hist(epi$F11postop)
> mean(epi$F11postop, na.rm=TRUE)
[1] 1.063677
> sd(epi$F11postop, na.rm=TRUE)
[1] 0.3265792
>
> t.test(epi$F11preop, epi$F11postop, alternative = c("two.sided"), paired =
TRUE)
```

Paired t-test

```
data: epi$F11preop and epi$F11postop
t = -1.2461, df = 30, p-value = 0.2224
```

```
alternative hypothesis: true difference in means is not equal to 0
95 percent confidence interval:
 -0.1531418  0.0370773
sample estimates:
mean of the differences
 -0.05803226
```

```
> wilcox.test(epi$F11preop, epi$F11postop, alternative = c("two.sided"), paired = TRUE)
```

Wilcoxon signed rank test with continuity correction

```
data: epi$F11preop and epi$F11postop
V = 189.5, p-value = 0.2557
alternative hypothesis: true location shift is not equal to 0
```

Warning message:

```
In wilcox.test.default(epi$F11preop, epi$F11postop, alternative = c("two.sided"), :
cannot compute exact p-value with ties
```

```
> #N/S
> x<-10
> y<-2.7
> arrows(x,y,x+1,y, length=0.05, angle=90, code=1)
> arrows(x,y,x+1,y, length=0.05, angle=90, code=2)
> text(x+0.5,y-0.1,"*",pos=3, cex=1.4)
>
>
> #hist(epi$F12preop)
> mean(epi$F12preop, na.rm=TRUE)
[1] 0.9438158
> sd(epi$F12preop, na.rm=TRUE)
[1] 0.2528337
>
> #hist(epi$F12postop)
> mean(epi$F12postop, na.rm=TRUE)
[1] 0.7950968
> sd(epi$F12postop, na.rm=TRUE)
[1] 0.3280546
>
> t.test(epi$F12preop, epi$F12postop, alternative = c("two.sided"), paired = TRUE)
```

Paired t-test

```
data: epi$F12preop and epi$F12postop
t = 5.3943, df = 30, p-value = 7.652e-06
alternative hypothesis: true difference in means is not equal to 0
95 percent confidence interval:
 0.1001053 0.2220882
sample estimates:
mean of the differences
 0.1610968
```

```
> wilcox.test(epi$F12preop, epi$F12postop, alternative = c("two.sided"), paired = TRUE)
```

### Wilcoxon signed rank test with continuity correction

data: epi\$F12preop and epi\$F12postop  
V = 454, p-value = 5.645e-05  
alternative hypothesis: true location shift is not equal to 0

#### Warning message:

In wilcox.test.default(epi\$F12preop, epi\$F12postop, alternative = c("two.sided"), :

cannot compute exact p-value with ties

```
> x<-16
> y<-2.7
> arrows(x,y,x+1,y, length=0.05, angle=90, code=1)
> arrows(x,y,x+1,y, length=0.05, angle=90, code=2)
> text(x+0.5,y-0.1,"**",pos=3, cex=1.4)
>
> #hist(epi$F13preop)
> mean(epi$F13preop, na.rm=TRUE)
[1] 1.203579
> sd(epi$F13preop, na.rm=TRUE)
[1] 0.3481401
>
> #hist(epi$F13postop)
> mean(epi$F13postop, na.rm=TRUE)
[1] 0.7787742
> sd(epi$F13postop, na.rm=TRUE)
[1] 0.2205076
>
> t.test(epi$F13preop, epi$F13postop,alternative = c("two.sided"),paired = TRUE)
```

### Paired t-test

data: epi\$F13preop and epi\$F13postop  
t = 8.4888, df = 30, p-value = 1.794e-09  
alternative hypothesis: true difference in means is not equal to 0  
95 percent confidence interval:  
0.2953388 0.4824676  
sample estimates:  
mean of the differences  
0.3889032

```
> wilcox.test(epi$F13preop, epi$F13postop,alternative = c("two.sided"),paired = TRUE)
```

### Wilcoxon signed rank test

data: epi\$F13preop and epi\$F13postop  
V = 496, p-value = 9.313e-10  
alternative hypothesis: true location shift is not equal to 0

```
> x<-19
> y<-2.7
> arrows(x,y,x+1,y, length=0.05, angle=90, code=1)
> arrows(x,y,x+1,y, length=0.05, angle=90, code=2)
```

```

> text(x+0.5,y-0.1,"**",pos=3, cex=1.4)
>
>
> mean(epi$Prov2rutinCRP,na.rm=TRUE)
[1] 91.96667
> sd(epi$Prov2rutinCRP,na.rm=TRUE)
[1] 59.82762
> hist(epi$Prov2rutinCRP)
>
> mean(epi$Prov1rutinPK,na.rm=TRUE)
[1] 1.029412
> sd(epi$Prov1rutinPK,na.rm=TRUE)
[1] 0.08714117
> hist(epi$Prov1rutinPK)
>
> mean(epi$Prov2rutinPK,na.rm=TRUE)
[1] 1.168571
> sd(epi$Prov2rutinPK,na.rm=TRUE)
[1] 0.1529541
> hist(epi$Prov2rutinPK)
>
>
> mean(epi$Prov1rutinAPTT,na.rm=TRUE)
[1] 27
> sd(epi$Prov1rutinAPTT,na.rm=TRUE)
[1] 2.872281
> hist(epi$Prov1rutinAPTT)
>
> mean(epi$Prov2rutinAPTT,na.rm=TRUE)
[1] 29.6
> sd(epi$Prov2rutinAPTT,na.rm=TRUE)
[1] 4.447074
> hist(epi$Prov2rutinAPTT)
>
>
> mean(epi$Prov1rutinTPK,na.rm=TRUE)
[1] 213.1053
> sd(epi$Prov1rutinTPK,na.rm=TRUE)
[1] 72.11282
> hist(epi$Prov1rutinTPK)
>
> mean(epi$Prov2rutinTPK,na.rm=TRUE)
[1] 283.0645
> sd(epi$Prov2rutinTPK,na.rm=TRUE)
[1] 153.446
> hist(epi$Prov2rutinTPK)
>
>
> #Correlation between withdrawal time and TPK
> hist(epi$withdrawaltime)
>
> plot(epi$withdrawaltime, epi$Prov2rutinTPK, xlab="Day of epidural
withdrawal", ylab = "Platelet count (millions/mL)", abline(lm(epi
$Prov2rutinTPK~epi$withdrawaltime)),cex.main=1.3, cex.lab=1.4)
> cor.test(epi$withdrawaltime, epi$Prov2rutinTPK, use="complete.obs",
method="pearson")

```



### Pearson's product-moment correlation

```
data: epi$withdrawaltime and epi$Prov2rutinTPK
t = 3.6065, df = 29, p-value = 0.001151
alternative hypothesis: true correlation is not equal to 0
95 percent confidence interval:
 0.2517544 0.7607874
sample estimates:
      cor
0.556455
```

```
> cor.test(epi$withdrawaltime, epi$Prov2rutinTPK, use="complete.obs",
method="spearman")
```

### Spearman's rank correlation rho

```
data: epi$withdrawaltime and epi$Prov2rutinTPK
S = 2363, p-value = 0.002504
alternative hypothesis: true rho is not equal to 0
sample estimates:
      rho
0.5235982
```

### Warning message:

```
In cor.test.default(epi$withdrawaltime, epi$Prov2rutinTPK, use =
"complete.obs", :
  Cannot compute exact p-value with ties
> text(x=13, y=700, "P<0.01", pos=3, cex=2)
> text(x=13, y=640, "r=0.56", pos=3, cex=2)
>
> #####SMALL DIAGRAMS FOR COMPOSITE PLOT
>
> #Standard plot
> cor.test(epi$XPARAM, epi$YPARAM, use="complete.obs", method="pearson")
Error in cor.test.default(epi$XPARAM, epi$YPARAM, use = "complete.obs", :
  'x' must be a numeric vector
> cor.test(epi$XPARAM, epi$YPARAM, use="complete.obs", method="spearman")
Error in cor.test.default(epi$XPARAM, epi$YPARAM, use = "complete.obs", :
  'x' must be a numeric vector
> #RESULT:
> plot(epi$XPARAM, epi$YPARAM, xlab="", ylab = "", cex.axis=3, cex=2.5, pch=19,
axes=F)
Error in plot.window(...) : need finite 'xlim' values
In addition: Warning messages:
1: In min(x) : no non-missing arguments to min; returning Inf
2: In max(x) : no non-missing arguments to max; returning -Inf
3: In min(x) : no non-missing arguments to min; returning Inf
4: In max(x) : no non-missing arguments to max; returning -Inf
> axis(side=1,lwd=4,cex.axis=3, labels=NA)
> axis(side=1,lwd=0,cex.axis=3, line=1)
> axis(side=2,lwd=4,cex.axis=3, labels=NA)
> axis(side=2,lwd=0,cex.axis=3, line=0)
>
> #INR vs EXTEM-MCF
> cor.test(epi$Prov2rutinPK, epi$Prov2extemMCF, use="complete.obs",
```

```
method="pearson")
```

Pearson's product-moment correlation

```
data: epi$Prov2rutinPK and epi$Prov2extemMCF
t = -1.4426, df = 31, p-value = 0.1592
alternative hypothesis: true correlation is not equal to 0
95 percent confidence interval:
 -0.5470235  0.1012061
sample estimates:
      cor
-0.2508175
```

```
> cor.test(epi$Prov2rutinPK, epi$Prov2extemMCF, use="complete.obs",
method="spearman")
```

Spearman's rank correlation rho

```
data: epi$Prov2rutinPK and epi$Prov2extemMCF
S = 6546.7, p-value = 0.6027
alternative hypothesis: true rho is not equal to 0
sample estimates:
      rho
-0.09402775
```

Warning message:

```
In cor.test.default(epi$Prov2rutinPK, epi$Prov2extemMCF, use =
"complete.obs", :
  Cannot compute exact p-value with ties
```

```
> #RESULT:
> plot(epi$Prov2rutinPK, epi$Prov2extemMCF, xlab="", ylab = "", cex.axis=3,
cex=2.5, pch=19, axes=F)
> axis(side=1,lwd=4,cex.axis=3, labels=NA)
> axis(side=1,lwd=0,cex.axis=3, line=1)
> axis(side=2,lwd=4,cex.axis=3, labels=NA)
> axis(side=2,lwd=0,cex.axis=3, line=0)
>
> #INR vs EXTEM-CT
> cor.test(epi$Prov2rutinPK, epi$Prov2extemCT, use="complete.obs",
method="pearson")
```

Pearson's product-moment correlation

```
data: epi$Prov2rutinPK and epi$Prov2extemCT
t = 1.1177, df = 31, p-value = 0.2723
alternative hypothesis: true correlation is not equal to 0
95 percent confidence interval:
 -0.1571117  0.5059370
sample estimates:
      cor
0.1968129
```

```
> cor.test(epi$Prov2rutinPK, epi$Prov2extemCT, use="complete.obs",
method="spearman")
```

Spearman's rank correlation rho

```
data: epi$Prov2rutinPK and epi$Prov2extemCT
S = 5462.4, p-value = 0.6296
alternative hypothesis: true rho is not equal to 0
sample estimates:
      rho
0.08716727
```

Warning message:

```
In cor.test.default(epi$Prov2rutinPK, epi$Prov2extemCT, use =
"complete.obs", :
  Cannot compute exact p-value with ties
> #RESULT:
> plot(epi$Prov2rutinPK, epi$Prov2extemCT, xlab="", ylab = "", cex.axis=3,
cex=2.5, pch=19, axes=F)
> axis(side=1,lwd=4,cex.axis=3, labels=NA)
> axis(side=1,lwd=0,cex.axis=3, line=1)
> axis(side=2,lwd=4,cex.axis=3, labels=NA)
> axis(side=2,lwd=0,cex.axis=3, line=0)
>
> #INR vs INTEM-CT
> cor.test(epi$Prov2rutinPK, epi$Prov2intemCT, use="complete.obs",
method="pearson")
```

Pearson's product-moment correlation

```
data: epi$Prov2rutinPK and epi$Prov2intemCT
t = -0.50255, df = 31, p-value = 0.6188
alternative hypothesis: true correlation is not equal to 0
95 percent confidence interval:
 -0.4202349  0.2614838
sample estimates:
      cor
-0.08989508
```

```
> cor.test(epi$Prov2rutinPK, epi$Prov2intemCT, use="complete.obs",
method="spearman")
```

Spearman's rank correlation rho

```
data: epi$Prov2rutinPK and epi$Prov2intemCT
S = 6241.9, p-value = 0.8118
alternative hypothesis: true rho is not equal to 0
sample estimates:
      rho
-0.04309158
```

Warning message:

```
In cor.test.default(epi$Prov2rutinPK, epi$Prov2intemCT, use =
"complete.obs", :
  Cannot compute exact p-value with ties
> #RESULT:
> plot(epi$Prov2rutinPK, epi$Prov2intemCT, xlab="", ylab = "", cex.axis=3,
cex=2.5, pch=19, axes=F)
> axis(side=1,lwd=4,cex.axis=3, labels=NA)
> axis(side=1,lwd=0,cex.axis=3, line=1)
```

```

> axis(side=2,lwd=4,cex.axis=3, labels=NA)
> axis(side=2,lwd=0,cex.axis=3, line=0)
>
>
> #INR vs FIBTEM-MCF
> cor.test(emi$Prov2rutinPK, emi$Prov2fibtemMCF, use="complete.obs",
method="pearson")

```

Pearson's product-moment correlation

```

data: emi$Prov2rutinPK and emi$Prov2fibtemMCF
t = -0.99309, df = 31, p-value = 0.3284
alternative hypothesis: true correlation is not equal to 0
95 percent confidence interval:
 -0.4893990  0.1784758
sample estimates:
      cor
-0.1755922

```

```

> cor.test(emi$Prov2rutinPK, emi$Prov2fibtemMCF, use="complete.obs",
method="spearman")

```

Spearman's rank correlation rho

```

data: emi$Prov2rutinPK and emi$Prov2fibtemMCF
S = 6137.7, p-value = 0.8872
alternative hypothesis: true rho is not equal to 0
sample estimates:
      rho
-0.02568291

```

Warning message:

```

In cor.test.default(emi$Prov2rutinPK, emi$Prov2fibtemMCF, use =
"complete.obs", :

```

```

  Cannot compute exact p-value with ties

```

```

> #RESULT:
> plot(emi$Prov2rutinPK, emi$Prov2intemCT, xlab="", ylab = "", cex.axis=3,
cex=2.5, pch=19, axes=F)
> axis(side=1,lwd=4,cex.axis=3, labels=NA)
> axis(side=1,lwd=0,cex.axis=3, line=1)
> axis(side=2,lwd=4,cex.axis=3, labels=NA)
> axis(side=2,lwd=0,cex.axis=3, line=0)
>
> #aPTT vs INTEM-CT
> cor.test(emi$Prov2rutinAPTT, emi$Prov2intemCT, use="complete.obs",
method="pearson")

```

Pearson's product-moment correlation

```

data: emi$Prov2rutinAPTT and emi$Prov2intemCT
t = -0.89483, df = 31, p-value = 0.3778
alternative hypothesis: true correlation is not equal to 0
95 percent confidence interval:
 -0.4760559  0.1952656
sample estimates:
      cor

```

-0.1586808

```
> cor.test(eps$Prov2rutinAPTT, eps$Prov2intemCT, use="complete.obs",  
method="spearman")
```

Spearman's rank correlation rho

```
data: eps$Prov2rutinAPTT and eps$Prov2intemCT  
S = 6583.8, p-value = 0.5789  
alternative hypothesis: true rho is not equal to 0  
sample estimates:  
rho  
-0.100237
```

Warning message:

```
In cor.test.default(eps$Prov2rutinAPTT, eps$Prov2intemCT, use =  
"complete.obs", :
```

```
Cannot compute exact p-value with ties
```

```
> #RESULT:
```

```
> plot(eps$Prov2rutinAPTT, eps$Prov2intemCT, xlab="", ylab = "", cex.axis=3,  
cex=2.5, pch=19, axes=F)
```

```
> axis(side=1,lwd=4,cex.axis=3, labels=NA)
```

```
> axis(side=1,lwd=0,cex.axis=3, line=1)
```

```
> axis(side=2,lwd=4,cex.axis=3, labels=NA)
```

```
> axis(side=2,lwd=0,cex.axis=3, line=0)
```

```
>
```

```
>
```

```
>
```

```
> #aPTT vs EXTEM-MCF
```

```
> cor.test(eps$Prov2rutinAPTT, eps$Prov2extemMCF, use="complete.obs",  
method="pearson")
```

Pearson's product-moment correlation

```
data: eps$Prov2rutinAPTT and eps$Prov2extemMCF  
t = -0.16956, df = 31, p-value = 0.8665  
alternative hypothesis: true correlation is not equal to 0  
95 percent confidence interval:  
-0.3698837 0.3161730  
sample estimates:  
cor  
-0.03044012
```

```
> cor.test(eps$Prov2rutinAPTT, eps$Prov2extemMCF, use="complete.obs",  
method="spearman")
```

Spearman's rank correlation rho

```
data: eps$Prov2rutinAPTT and eps$Prov2extemMCF  
S = 5841.2, p-value = 0.8951  
alternative hypothesis: true rho is not equal to 0  
sample estimates:  
rho  
0.02386784
```

Warning message:

```

In cor.test.default(epi$Prov2rutinAPTT, epi$Prov2extemMCF, use =
"complete.obs", :
  Cannot compute exact p-value with ties
> #RESULT:
> plot(epi$Prov2rutinAPTT, epi$Prov2extemMCF, xlab="", ylab = "", cex.axis=3,
cex=2.5, pch=19, axes=F)
> axis(side=1,lwd=4,cex.axis=3, labels=NA)
> axis(side=1,lwd=0,cex.axis=3, line=1)
> axis(side=2,lwd=4,cex.axis=3, labels=NA)
> axis(side=2,lwd=0,cex.axis=3, line=0)
>
> #aPTT vs EXTEM-CT
> cor.test(epi$Prov2rutinAPTT, epi$Prov2extemCT, use="complete.obs",
method="pearson")

```

Pearson's product-moment correlation

```

data: epi$Prov2rutinAPTT and epi$Prov2extemCT
t = 0.96335, df = 31, p-value = 0.3428
alternative hypothesis: true correlation is not equal to 0
95 percent confidence interval:
 -0.1835627  0.4853891
sample estimates:
      cor
0.1704904

```

```

> cor.test(epi$Prov2rutinAPTT, epi$Prov2extemCT, use="complete.obs",
method="spearman")

```

Spearman's rank correlation rho

```

data: epi$Prov2rutinAPTT and epi$Prov2extemCT
S = 6474.8, p-value = 0.65
alternative hypothesis: true rho is not equal to 0
sample estimates:
      rho
-0.08202175

```

Warning message:

```

In cor.test.default(epi$Prov2rutinAPTT, epi$Prov2extemCT, use =
"complete.obs", :
  Cannot compute exact p-value with ties
> #RESULT:
> plot(epi$Prov2rutinAPTT, epi$Prov2extemCT, xlab="", ylab = "", cex.axis=3,
cex=2.5, pch=19, axes=F)
> axis(side=1,lwd=4,cex.axis=3, labels=NA)
> axis(side=1,lwd=0,cex.axis=3, line=1)
> axis(side=2,lwd=4,cex.axis=3, labels=NA)
> axis(side=2,lwd=0,cex.axis=3, line=0)
>
> #aPTT vs FIBTEM-MCF
> cor.test(epi$Prov2rutinAPTT, epi$Prov2fibtemMCF, use="complete.obs",
method="pearson")

```

Pearson's product-moment correlation

```
data: epi$Prov2rutinAPTT and epi$Prov2fibtemMCF
t = -0.9046, df = 31, p-value = 0.3727
alternative hypothesis: true correlation is not equal to 0
95 percent confidence interval:
 -0.4773939  0.1935995
sample estimates:
      cor
-0.1603683
```

```
> cor.test(epi$Prov2rutinAPTT, epi$Prov2fibtemMCF, use="complete.obs",
method="spearman")
```

Spearman's rank correlation rho

```
data: epi$Prov2rutinAPTT and epi$Prov2fibtemMCF
S = 6003.7, p-value = 0.9855
alternative hypothesis: true rho is not equal to 0
sample estimates:
      rho
-0.003286168
```

Warning message:

```
In cor.test.default(epi$Prov2rutinAPTT, epi$Prov2fibtemMCF, use =
"complete.obs", :
```

```
Cannot compute exact p-value with ties
```

```
> #RESULT:
```

```
> plot(epi$Prov2rutinAPTT, epi$Prov2fibtemMCF, xlab="", ylab = "", cex.axis=3,
cex=2.5, pch=19, axes=F)
```

```
> axis(side=1,lwd=4,cex.axis=3, labels=NA)
```

```
> axis(side=1,lwd=0,cex.axis=3, line=1)
```

```
> axis(side=2,lwd=4,cex.axis=3, labels=NA)
```

```
> axis(side=2,lwd=0,cex.axis=3, line=0)
```

```
>
```

```
> #aPTT vs FIBTEM-CT
```

```
> cor.test(epi$Prov2rutinAPTT, epi$Prov2fibtemCT, use="complete.obs",
method="pearson")
```

Pearson's product-moment correlation

```
data: epi$Prov2rutinAPTT and epi$Prov2fibtemCT
t = 1.129, df = 31, p-value = 0.2676
alternative hypothesis: true correlation is not equal to 0
95 percent confidence interval:
 -0.1551655  0.5074197
sample estimates:
      cor
0.1987298
```

```
> cor.test(epi$Prov2rutinAPTT, epi$Prov2fibtemCT, use="complete.obs",
method="spearman")
```

Spearman's rank correlation rho

```
data: epi$Prov2rutinAPTT and epi$Prov2fibtemCT
S = 4797.7, p-value = 0.2687
alternative hypothesis: true rho is not equal to 0
```

```
sample estimates:
      rho
0.1982488
```

Warning message:

```
In cor.test.default(epi$Prov2rutinAPTT, epi$Prov2fibtemCT, use =
"complete.obs", :
  Cannot compute exact p-value with ties
```

```
> #RESULT:
> plot(epi$Prov2rutinAPTT, epi$Prov2fibtemCT, xlab="", ylab = "", cex.axis=3,
cex=2.5, pch=19, axes=F)
> axis(side=1,lwd=4,cex.axis=3, labels=NA)
> axis(side=1,lwd=0,cex.axis=3, line=1)
> axis(side=2,lwd=4,cex.axis=3, labels=NA)
> axis(side=2,lwd=0,cex.axis=3, line=0)
>
> #Plc vs EXTEM-MCF
> cor.test(epi$Prov2rutinTPK, epi$Prov2extemMCF, use="complete.obs",
method="pearson")
```

Pearson's product-moment correlation

```
data: epi$Prov2rutinTPK and epi$Prov2extemMCF
t = 3.7841, df = 29, p-value = 0.0007166
alternative hypothesis: true correlation is not equal to 0
95 percent confidence interval:
 0.2770366 0.7720028
sample estimates:
      cor
0.5749378
```

```
> cor.test(epi$Prov2rutinTPK, epi$Prov2extemMCF, use="complete.obs",
method="spearman")
```

Spearman's rank correlation rho

```
data: epi$Prov2rutinTPK and epi$Prov2extemMCF
S = 1981.3, p-value = 0.0003543
alternative hypothesis: true rho is not equal to 0
sample estimates:
      rho
0.6005494
```

Warning message:

```
In cor.test.default(epi$Prov2rutinTPK, epi$Prov2extemMCF, use =
"complete.obs", :
  Cannot compute exact p-value with ties
```

```
> #RESULT:
> plot(epi$Prov2rutinTPK, epi$Prov2extemMCF, xlab="", ylab = "", cex.axis=3,
cex=2.5, pch=19, axes=F,abline(lm(epi$Prov2extemMCF~ epi$Prov2rutinTPK),lwd=3))
> axis(side=1,lwd=4,cex.axis=3, labels=NA)
> axis(side=1,lwd=0,cex.axis=3, line=1)
> axis(side=2,lwd=4,cex.axis=3, labels=NA)
> axis(side=2,lwd=0,cex.axis=3, line=0)
> text(500, 55 , "r=0.57 **", pos=3, cex=7)
>
```



```
>
> #Plc vs EXTEM-CT
> cor.test(emi$Prov2rutinTPK, emi$Prov2extemCT, use="complete.obs",
method="pearson")
```

Pearson's product-moment correlation

```
data: emi$Prov2rutinTPK and emi$Prov2extemCT
t = -0.19277, df = 29, p-value = 0.8485
alternative hypothesis: true correlation is not equal to 0
95 percent confidence interval:
 -0.3852304  0.3226567
sample estimates:
      cor
-0.03577342
```

```
> cor.test(emi$Prov2rutinTPK, emi$Prov2extemCT, use="complete.obs",
method="spearman")
```

Spearman's rank correlation rho

```
data: emi$Prov2rutinTPK and emi$Prov2extemCT
S = 4601.2, p-value = 0.699
alternative hypothesis: true rho is not equal to 0
sample estimates:
      rho
0.07233799
```

Warning message:

```
In cor.test.default(emi$Prov2rutinTPK, emi$Prov2extemCT, use =
"complete.obs", :
```

```
Cannot compute exact p-value with ties
```

```
> #RESULT:
```

```
> plot(emi$Prov2rutinTPK, emi$Prov2extemCT, xlab="", ylab = "", cex.axis=3,
cex=2.5, pch=19, axes=F)
```

```
> axis(side=1,lwd=4,cex.axis=3, labels=NA)
```

```
> axis(side=1,lwd=0,cex.axis=3, line=1)
```

```
> axis(side=2,lwd=4,cex.axis=3, labels=NA)
```

```
> axis(side=2,lwd=0,cex.axis=3, line=0)
```

```
>
```

```
> #Plc vs INTEM-CT
```

```
> cor.test(emi$Prov2rutinTPK, emi$Prov2intemCT, use="complete.obs",
method="pearson")
```

Pearson's product-moment correlation

```
data: emi$Prov2rutinTPK and emi$Prov2intemCT
t = 0.4713, df = 29, p-value = 0.641
alternative hypothesis: true correlation is not equal to 0
95 percent confidence interval:
 -0.2756719  0.4282934
sample estimates:
      cor
0.08718459
```

```
> cor.test(emi$Prov2rutinTPK, emi$Prov2intemCT, use="complete.obs",
```

```
method="spearman")
```

Spearman's rank correlation rho

```
data: epi$Prov2rutinTPK and epi$Prov2intemCT
S = 5611.2, p-value = 0.4814
alternative hypothesis: true rho is not equal to 0
sample estimates:
      rho
-0.1312897
```

Warning message:

```
In cor.test.default(epi$Prov2rutinTPK, epi$Prov2intemCT, use =
"complete.obs", :
```

```
Cannot compute exact p-value with ties
```

```
> #RESULT:
```

```
> plot(epi$Prov2rutinTPK, epi$Prov2intemCT, xlab="", ylab = "", cex.axis=3,
cex=2.5, pch=19, axes=F)
```

```
> axis(side=1,lwd=4,cex.axis=3, labels=NA)
```

```
> axis(side=1,lwd=0,cex.axis=3, line=1)
```

```
> axis(side=2,lwd=4,cex.axis=3, labels=NA)
```

```
> axis(side=2,lwd=0,cex.axis=3, line=0)
```

```
>
```

```
> #Plc vs FIBTEM-MCF
```

```
> cor.test(epi$Prov2rutinTPK, epi$Prov2fibtemMCF, use="complete.obs",
method="pearson")
```

Pearson's product-moment correlation

```
data: epi$Prov2rutinTPK and epi$Prov2fibtemMCF
t = 3.5516, df = 29, p-value = 0.001331
alternative hypothesis: true correlation is not equal to 0
95 percent confidence interval:
 0.2437729 0.7571824
sample estimates:
      cor
0.5505567
```

```
> cor.test(epi$Prov2rutinTPK, epi$Prov2fibtemMCF, use="complete.obs",
method="spearman")
```

Spearman's rank correlation rho

```
data: epi$Prov2rutinTPK and epi$Prov2fibtemMCF
S = 1826, p-value = 0.0001375
alternative hypothesis: true rho is not equal to 0
sample estimates:
      rho
0.6318629
```

Warning message:

```
In cor.test.default(epi$Prov2rutinTPK, epi$Prov2fibtemMCF, use =
"complete.obs", :
```

```
Cannot compute exact p-value with ties
```

```
> #RESULT:
```

```
> plot(epi$Prov2rutinTPK, epi$Prov2fibtemMCF, xlab="", ylab = "", cex.axis=3,
```

```

cex=2.5, pch=19, axes=F, abline(lm(emi$Prov2fibtemMCF~emi$Prov2rutinTPK), lwd=3))
> axis(side=1, lwd=4, cex.axis=3, labels=NA)
> axis(side=1, lwd=0, cex.axis=3, line=1)
> axis(side=2, lwd=4, cex.axis=3, labels=NA)
> axis(side=2, lwd=0, cex.axis=3, line=0)
> text(550, 20, "r=0.55 **", cex=7)
>
>
> #DD vs EXTEM-MCF
> cor.test(emi$DDpostop, emi$Prov2extemMCF, use="complete.obs",
method="pearson")

```

Pearson's product-moment correlation

```

data: emi$DDpostop and emi$Prov2extemMCF
t = 1.1426, df = 29, p-value = 0.2626
alternative hypothesis: true correlation is not equal to 0
95 percent confidence interval:
 -0.1584429  0.5233974
sample estimates:
      cor
0.2075496

```

```

> cor.test(emi$DDpostop, emi$Prov2extemMCF, use="complete.obs",
method="spearman")

```

Spearman's rank correlation rho

```

data: emi$DDpostop and emi$Prov2extemMCF
S = 3875.7, p-value = 0.2374
alternative hypothesis: true rho is not equal to 0
sample estimates:
      rho
0.2186031

```

Warning message:

```

In cor.test.default(emi$DDpostop, emi$Prov2extemMCF, use = "complete.obs", :
  Cannot compute exact p-value with ties

```

```

> #RESULT:
> plot(emi$DDpostop, emi$Prov2extemMCF, xlab="", ylab = "", cex.axis=3,
cex=2.5, pch=19, axes=F)
> axis(side=1, lwd=4, cex.axis=3, labels=NA)
> axis(side=1, lwd=0, cex.axis=3, line=1)
> axis(side=2, lwd=4, cex.axis=3, labels=NA)
> axis(side=2, lwd=0, cex.axis=3, line=0)
>
> #DD vs EXTEM-CT
> cor.test(emi$DDpostop, emi$Prov2extemCT, use="complete.obs",
method="pearson")

```

Pearson's product-moment correlation

```

data: emi$DDpostop and emi$Prov2extemCT
t = -2.5824, df = 29, p-value = 0.01513
alternative hypothesis: true correlation is not equal to 0
95 percent confidence interval:

```

```
-0.6822053 -0.0921686
sample estimates:
      cor
-0.4323874
```

```
> cor.test(emi$DDpostop, emi$Prov2extemCT, use="complete.obs",
method="spearman")
```

Spearman's rank correlation rho

```
data: emi$DDpostop and emi$Prov2extemCT
S = 6410.6, p-value = 0.1104
alternative hypothesis: true rho is not equal to 0
sample estimates:
      rho
-0.2924667
```

Warning message:

```
In cor.test.default(emi$DDpostop, emi$Prov2extemCT, use = "complete.obs", :
  Cannot compute exact p-value with ties
```

```
> #RESULT:
> plot(emi$DDpostop, emi$Prov2extemCT, xlab="", ylab = "", cex.axis=3, cex=2.5,
pch=19, axes=F,abline(lm(emi$Prov2extemCT~ emi$DDpostop),lwd=3,lty=2))
> axis(side=1,lwd=4,cex.axis=3, labels=NA)
> axis(side=1,lwd=0,cex.axis=3, line=1)
> axis(side=2,lwd=4,cex.axis=3, labels=NA)
> axis(side=2,lwd=0,cex.axis=3, line=0)
> text(3.7,70,"r=-0.43*",cex=7)
> #Note: given the outlier with a really high D-Dimer, and that the non-
parametric test does not give significance while the parametric one does, I
have counted this as a 'non-significant' result. /OT
>
> #DD vs INTEM-CT
> cor.test(emi$DDpostop, emi$Prov2intemCT, use="complete.obs",
method="pearson")
```

Pearson's product-moment correlation

```
data: emi$DDpostop and emi$Prov2intemCT
t = -0.17456, df = 29, p-value = 0.8626
alternative hypothesis: true correlation is not equal to 0
95 percent confidence interval:
 -0.3823491 0.3256805
sample estimates:
      cor
-0.03239841
```

```
> cor.test(emi$DDpostop, emi$Prov2intemCT, use="complete.obs",
method="spearman")
```

Spearman's rank correlation rho

```
data: emi$DDpostop and emi$Prov2intemCT
S = 5913.5, p-value = 0.3002
alternative hypothesis: true rho is not equal to 0
sample estimates:
```

```
rho
-0.192234
```

Warning message:

```
In cor.test.default(emi$DDpostop, emi$Prov2intemCT, use = "complete.obs", :
  Cannot compute exact p-value with ties
```

```
> #RESULT:
> plot(emi$DDpostop, emi$Prov2intemCT, xlab="", ylab = "", cex.axis=3, cex=2.5,
pch=19, axes=F)
> axis(side=1,lwd=4,cex.axis=3, labels=NA)
> axis(side=1,lwd=0,cex.axis=3, line=1)
> axis(side=2,lwd=4,cex.axis=3, labels=NA)
> axis(side=2,lwd=0,cex.axis=3, line=0)
>
> #DD vs FIBTEM-MCF
> cor.test(emi$DDpostop, emi$Prov2fibtemMCF, use="complete.obs",
method="pearson")
```

Pearson's product-moment correlation

```
data: emi$DDpostop and emi$Prov2fibtemMCF
t = 3.1564, df = 29, p-value = 0.003709
alternative hypothesis: true correlation is not equal to 0
95 percent confidence interval:
 0.1843580 0.7293265
sample estimates:
      cor
0.5056653
```

```
> cor.test(emi$DDpostop, emi$Prov2fibtemMCF, use="complete.obs",
method="spearman")
```

Spearman's rank correlation rho

```
data: emi$DDpostop and emi$Prov2fibtemMCF
S = 1948.5, p-value = 0.0002926
alternative hypothesis: true rho is not equal to 0
sample estimates:
      rho
0.6071597
```

Warning message:

```
In cor.test.default(emi$DDpostop, emi$Prov2fibtemMCF, use = "complete.obs", :
  Cannot compute exact p-value with ties
```

```
> #RESULT:
> plot(emi$DDpostop, emi$Prov2fibtemMCF, xlab="", ylab = "", cex.axis=3,
cex=2.5, pch=19, axes=F,abline(lm(emi$Prov2fibtemMCF~ emi$DDpostop),lwd=3))
> axis(side=1,lwd=4,cex.axis=3, labels=NA)
> axis(side=1,lwd=0,cex.axis=3, line=1)
> axis(side=2,lwd=4,cex.axis=3, labels=NA)
> axis(side=2,lwd=0,cex.axis=3, line=0)
> text(3.5, 22 , "r=0.51**", cex=7, pos=1)
>
> #Fibrinogen vs EXTEM-MCF
> cor.test(emi$FIBpostop, emi$Prov2extemMCF, use="complete.obs",
method="pearson")
```

Pearson's product-moment correlation

```
data: epi$FIBpostop and epi$Prov2extemMCF
t = 2.2847, df = 29, p-value = 0.02983
alternative hypothesis: true correlation is not equal to 0
95 percent confidence interval:
 0.04203983 0.65434600
sample estimates:
      cor
0.390562
```

```
> cor.test(epi$FIBpostop, epi$Prov2extemMCF, use="complete.obs",
method="spearman")
```

Spearman's rank correlation rho

```
data: epi$FIBpostop and epi$Prov2extemMCF
S = 3458.5, p-value = 0.09785
alternative hypothesis: true rho is not equal to 0
sample estimates:
      rho
0.3027318
```

Warning message:

```
In cor.test.default(epi$FIBpostop, epi$Prov2extemMCF, use = "complete.obs", :
  Cannot compute exact p-value with ties
```

```
> #RESULT:
```

```
> plot(epi$FIBpostop, epi$Prov2extemMCF, xlab="", ylab = "", cex.axis=3,
cex=2.5, pch=19, axes=F,abline(lm(epi$Prov2extemMCF~ epi
$FIBpostop),lwd=3,lty=2))
```

```
> axis(side=1,lwd=4,cex.axis=3, labels=NA)
```

```
> axis(side=1,lwd=0,cex.axis=3, line=1)
```

```
> axis(side=2,lwd=4,cex.axis=3, labels=NA)
```

```
> axis(side=2,lwd=0,cex.axis=3, line=0)
```

```
> epi$Prov2extemMCF
```

```
[1] 71 76 74 75 77 73 73 73 75 68 77 74 66 70 NA 63 69 80 68 NA 71 64 72 65 63
```

```
[26] NA 60 54 NA NA 80 76 77 75 77 73 79 77
```

```
> text(6.4,58,"r=0.39*",cex=8)
```

```
> #NB given that the non-parametric test is non-significant, parametric sig.
```

```
>
```

```
> #Fibrinogen vs EXTEM-CT
```

```
> cor.test(epi$FIBpostop, epi$Prov2extemCT, use="complete.obs",
method="pearson")
```

Pearson's product-moment correlation

```
data: epi$FIBpostop and epi$Prov2extemCT
t = -1.6132, df = 29, p-value = 0.1175
alternative hypothesis: true correlation is not equal to 0
95 percent confidence interval:
 -0.58211669 0.07499732
sample estimates:
      cor
-0.2869689
```

```
> cor.test(epi$FIBpostop, epi$Prov2extemCT, use="complete.obs",
method="spearman")
```

Spearman's rank correlation rho

```
data: epi$FIBpostop and epi$Prov2extemCT
S = 7078.1, p-value = 0.01658
alternative hypothesis: true rho is not equal to 0
sample estimates:
      rho
-0.4270374
```

Warning message:

```
In cor.test.default(epi$FIBpostop, epi$Prov2extemCT, use = "complete.obs", :
  Cannot compute exact p-value with ties
```

```
> #RESULT:
```

```
> plot(epi$FIBpostop, epi$Prov2extemCT, xlab="", ylab = "", cex.axis=3,
cex=2.5, pch=19, axes=F,abline(lm(epi$Prov2extemCT~ epi
$FIBpostop),lwd=3,lty=2))
```

```
> axis(side=1,lwd=4,cex.axis=3, labels=NA)
```

```
> axis(side=1,lwd=0,cex.axis=3, line=1)
```

```
> axis(side=2,lwd=4,cex.axis=3, labels=NA)
```

```
> axis(side=2,lwd=0,cex.axis=3, line=0)
```

```
> text(5.5,30,"rho=-0.42*",cex=6)
```

```
> #NB given that the non-parametric but not the parametric test is significant,
I have not counted this as significant.
```

```
>
```

```
> #Fibrinogen vs INTEM-CT
```

```
> cor.test(epi$FIBpostop, epi$Prov2intemCT, use="complete.obs",
method="pearson")
```

Pearson's product-moment correlation

```
data: epi$FIBpostop and epi$Prov2intemCT
t = -0.13747, df = 29, p-value = 0.8916
alternative hypothesis: true correlation is not equal to 0
95 percent confidence interval:
 -0.3764550  0.3318216
sample estimates:
      cor
-0.02551897
```

```
> cor.test(epi$FIBpostop, epi$Prov2intemCT, use="complete.obs",
method="spearman")
```

Spearman's rank correlation rho

```
data: epi$FIBpostop and epi$Prov2intemCT
S = 4353.6, p-value = 0.5124
alternative hypothesis: true rho is not equal to 0
sample estimates:
      rho
0.1222554
```

Warning message:

```
In cor.test.default(epi$FIBpostop, epi$Prov2intemCT, use = "complete.obs", :
```

```

    Cannot compute exact p-value with ties
> #RESULT:
> plot(epi$FIBpostop, epi$Prov2intemCT, xlab="", ylab = "", cex.axis=3,
cex=2.5, pch=19, axes=F)
> axis(side=1,lwd=4,cex.axis=3, labels=NA)
> axis(side=1,lwd=0,cex.axis=3, line=1)
> axis(side=2,lwd=4,cex.axis=3, labels=NA)
> axis(side=2,lwd=0,cex.axis=3, line=0)
>
> #Fibrinogen vs FIBTEM-MCF
> cor.test(epi$FIBpostop, epi$fibtemMCF, use="complete.obs", method="pearson")
Error in cor.test.default(epi$FIBpostop, epi$fibtemMCF, use =
"complete.obs", :
  'x' and 'y' must have the same length
> cor.test(epi$FIBpostop, epi$fibtemMCF, use="complete.obs", method="spearman")
Error in cor.test.default(epi$FIBpostop, epi$fibtemMCF, use =
"complete.obs", :
  'x' and 'y' must have the same length
> #RESULT:
> plot(epi$FIBpostop, epi$fibtemMCF, xlab="", ylab = "", cex.axis=3, cex=2.5,
pch=19, axes=F)
> axis(side=1,lwd=4,cex.axis=3, labels=NA)
> axis(side=1,lwd=0,cex.axis=3, line=1)
> axis(side=2,lwd=4,cex.axis=3, labels=NA)
> axis(side=2,lwd=0,cex.axis=3, line=0)
>
> #F2 vs EXTEM-MCF
> cor.test(epi$F2postop, epi$Prov2extemMCF, use="complete.obs",
method="pearson")

```

Pearson's product-moment correlation

```

data: epi$F2postop and epi$Prov2extemMCF
t = 1.2043, df = 29, p-value = 0.2382
alternative hypothesis: true correlation is not equal to 0
95 percent confidence interval:
 -0.1475097  0.5314781
sample estimates:
      cor
0.2182373

```

```

> cor.test(epi$F2postop, epi$Prov2extemMCF, use="complete.obs",
method="spearman")

```

Spearman's rank correlation rho

```

data: epi$F2postop and epi$Prov2extemMCF
S = 4169.9, p-value = 0.392
alternative hypothesis: true rho is not equal to 0
sample estimates:
      rho
0.1592969

```

Warning message:

```

In cor.test.default(epi$F2postop, epi$Prov2extemMCF, use = "complete.obs", :
  Cannot compute exact p-value with ties

```



```

> #RESULT:
> plot(epi$F2postop, epi$Prov2extemMCF, xlab="", ylab = "", cex.axis=3,
cex=2.5, pch=19, axes=F)
> axis(side=1,lwd=4,cex.axis=3, labels=NA)
> axis(side=1,lwd=0,cex.axis=3, line=1)
> axis(side=2,lwd=4,cex.axis=3, labels=NA)
> axis(side=2,lwd=0,cex.axis=3, line=0)
>
>
> #F2 vs EXTEM-CT
> cor.test(epi$F2postop, epi$Prov2extemCT, use="complete.obs",
method="pearson")

```

Pearson's product-moment correlation

```

data: epi$F2postop and epi$Prov2extemCT
t = -1.5235, df = 29, p-value = 0.1385
alternative hypothesis: true correlation is not equal to 0
95 percent confidence interval:
 -0.57143614  0.09089247
sample estimates:
      cor
-0.2722148

```

```

> cor.test(epi$F2postop, epi$Prov2extemCT, use="complete.obs",
method="spearman")

```

Spearman's rank correlation rho

```

data: epi$F2postop and epi$Prov2extemCT
S = 6559.9, p-value = 0.07676
alternative hypothesis: true rho is not equal to 0
sample estimates:
      rho
-0.3225616

```

Warning message:

```

In cor.test.default(epi$F2postop, epi$Prov2extemCT, use = "complete.obs", :
  Cannot compute exact p-value with ties

```

```

> #RESULT:
> plot(epi$F2postop, epi$Prov2extemCT, xlab="", ylab = "", cex.axis=3, cex=2.5,
pch=19, axes=F)
> axis(side=1,lwd=4,cex.axis=3, labels=NA)
> axis(side=1,lwd=0,cex.axis=3, line=1)
> axis(side=2,lwd=4,cex.axis=3, labels=NA)
> axis(side=2,lwd=0,cex.axis=3, line=0)
>
> #F2 vs INTEM-CT
> cor.test(epi$F2postop, epi$Prov2intemCT, use="complete.obs",
method="pearson")

```

Pearson's product-moment correlation

```

data: epi$F2postop and epi$Prov2intemCT
t = -0.95783, df = 29, p-value = 0.3461
alternative hypothesis: true correlation is not equal to 0

```

95 percent confidence interval:

-0.4985228 0.1910803

sample estimates:

cor

-0.1751165

```
> cor.test(epi$F2postop, epi$Prov2intemCT, use="complete.obs",  
method="spearman")
```

Spearman's rank correlation rho

data: epi\$F2postop and epi\$Prov2intemCT

S = 5693.4, p-value = 0.4273

alternative hypothesis: true rho is not equal to 0

sample estimates:

rho

-0.1478568

Warning message:

```
In cor.test.default(epi$F2postop, epi$Prov2intemCT, use = "complete.obs", :  
Cannot compute exact p-value with ties
```

```
> #RESULT:
```

```
> plot(epi$F2postop, epi$Prov2intemCT, xlab="", ylab = "", cex.axis=3, cex=2.5,  
pch=19, axes=F)
```

```
> axis(side=1,lwd=4,cex.axis=3, labels=NA)
```

```
> axis(side=1,lwd=0,cex.axis=3, line=1)
```

```
> axis(side=2,lwd=4,cex.axis=3, labels=NA)
```

```
> axis(side=2,lwd=0,cex.axis=3, line=0)
```

```
>
```

```
> #F2 vs FIBTEM-MCF
```

```
> cor.test(epi$F2postop, epi$Prov2fibtemMCF, use="complete.obs",  
method="pearson")
```

Pearson's product-moment correlation

data: epi\$F2postop and epi\$Prov2fibtemMCF

t = 2.7334, df = 29, p-value = 0.01057

alternative hypothesis: true correlation is not equal to 0

95 percent confidence interval:

0.1170382 0.6954189

sample estimates:

cor

0.4526081

```
> cor.test(epi$F2postop, epi$Prov2fibtemMCF, use="complete.obs",  
method="spearman")
```

Spearman's rank correlation rho

data: epi\$F2postop and epi\$Prov2fibtemMCF

S = 3387.6, p-value = 0.08226

alternative hypothesis: true rho is not equal to 0

sample estimates:

rho

0.3170251

Warning message:

```
In cor.test.default(epi$F2postop, epi$Prov2fibtemMCF, use = "complete.obs", :  
  Cannot compute exact p-value with ties
```

```
> #RESULT:  
> plot(epi$F2postop, epi$Prov2fibtemMCF, xlab="", ylab = "", cex.axis=3,  
cex=2.5, pch=19, axes=F,abline(lm(epi$Prov2fibtemMCF~ epi$F2postop),lwd=3,  
lty=2))  
> axis(side=1,lwd=4,cex.axis=3, labels=NA)  
> axis(side=1,lwd=0,cex.axis=3, line=1)  
> axis(side=2,lwd=4,cex.axis=3, labels=NA)  
> axis(side=2,lwd=0,cex.axis=3, line=0)  
> text(1.5,22,"r=0.45*",cex=7,pos=1)  
>  
>  
>  
> #F7 vs EXTEM-MCF  
> cor.test(epi$F7postop, epi$Prov2extemMCF, use="complete.obs",  
method="pearson")
```

Pearson's product-moment correlation

```
data: epi$F7postop and epi$Prov2extemMCF  
t = 0.97461, df = 29, p-value = 0.3378  
alternative hypothesis: true correlation is not equal to 0  
95 percent confidence interval:  
 -0.1881239  0.5008238  
sample estimates:  
      cor  
0.1780875
```

```
> cor.test(epi$F7postop, epi$Prov2extemMCF, use="complete.obs",  
method="spearman")
```

Spearman's rank correlation rho

```
data: epi$F7postop and epi$Prov2extemMCF  
S = 4588.5, p-value = 0.6889  
alternative hypothesis: true rho is not equal to 0  
sample estimates:  
      rho  
0.07489179
```

Warning message:

```
In cor.test.default(epi$F7postop, epi$Prov2extemMCF, use = "complete.obs", :  
  Cannot compute exact p-value with ties
```

```
> #RESULT:  
> plot(epi$F7postop, epi$Prov2extemMCF, xlab="", ylab = "", cex.axis=3,  
cex=2.5, pch=19, axes=F)  
> axis(side=1,lwd=4,cex.axis=3, labels=NA)  
> axis(side=1,lwd=0,cex.axis=3, line=1)  
> axis(side=2,lwd=4,cex.axis=3, labels=NA)  
> axis(side=2,lwd=0,cex.axis=3, line=0)  
>  
>  
>  
> #F7 vs EXTEM-CT  
> cor.test(epi$F7postop, epi$Prov2extemCT, use="complete.obs",
```

```
method="pearson")
```

Pearson's product-moment correlation

```
data: epi$F7postop and epi$Prov2extemCT
t = -1.6856, df = 29, p-value = 0.1026
alternative hypothesis: true correlation is not equal to 0
95 percent confidence interval:
 -0.59055327  0.06220115
sample estimates:
      cor
-0.2987229
```

```
> cor.test(epi$F7postop, epi$Prov2extemCT, use="complete.obs",
method="spearman")
```

Spearman's rank correlation rho

```
data: epi$F7postop and epi$Prov2extemCT
S = 7005.7, p-value = 0.02113
alternative hypothesis: true rho is not equal to 0
sample estimates:
      rho
-0.4124426
```

Warning message:

```
In cor.test.default(epi$F7postop, epi$Prov2extemCT, use = "complete.obs", :
  Cannot compute exact p-value with ties
```

```
> #RESULT:
```

```
> plot(epi$F7postop, epi$Prov2extemCT, xlab="", ylab = "", cex.axis=3, cex=2.5,
pch=19, axes=F,abline(lm(epi$Prov2extemCT~ epi$F7postop),lwd=3,lty=2))
```

```
> axis(side=1,lwd=4,cex.axis=3, labels=NA)
```

```
> axis(side=1,lwd=0,cex.axis=3, line=1)
```

```
> axis(side=2,lwd=4,cex.axis=3, labels=NA)
```

```
> axis(side=2,lwd=0,cex.axis=3, line=0)
```

```
> text(1.1,70,"rho=-0.41",cex=6)
```

```
>
```

```
> #F7 vs intem-CT
```

```
> cor.test(epi$F7postop, epi$Prov2intemCT, use="complete.obs",
method="pearson")
```

Pearson's product-moment correlation

```
data: epi$F7postop and epi$Prov2intemCT
t = -1.1018, df = 29, p-value = 0.2796
alternative hypothesis: true correlation is not equal to 0
95 percent confidence interval:
 -0.5179922  0.1656640
sample estimates:
      cor
-0.2004424
```

```
> cor.test(epi$F7postop, epi$Prov2intemCT, use="complete.obs",
method="spearman")
```

Spearman's rank correlation rho

```
data: epi$F7postop and epi$Prov2intemCT
S = 5766.4, p-value = 0.3822
alternative hypothesis: true rho is not equal to 0
sample estimates:
      rho
-0.162582
```

Warning message:

```
In cor.test.default(epi$F7postop, epi$Prov2intemCT, use = "complete.obs", :
  Cannot compute exact p-value with ties
> #RESULT:
> plot(epi$F7postop, epi$Prov2intemCT, xlab="", ylab = "", cex.axis=3, cex=2.5,
pch=19, axes=F)
> axis(side=1,lwd=4,cex.axis=3, labels=NA)
> axis(side=1,lwd=0,cex.axis=3, line=1)
> axis(side=2,lwd=4,cex.axis=3, labels=NA)
> axis(side=2,lwd=0,cex.axis=3, line=0)
>
>
> #F7 vs fibtem-MCF
> cor.test(epi$F7postop, epi$Prov2fibtemMCF, use="complete.obs",
method="pearson")
```

Pearson's product-moment correlation

```
data: epi$F7postop and epi$Prov2fibtemMCF
t = 1.1696, df = 29, p-value = 0.2517
alternative hypothesis: true correlation is not equal to 0
95 percent confidence interval:
 -0.153646  0.526958
sample estimates:
      cor
0.2122496
```

```
> cor.test(epi$F7postop, epi$Prov2fibtemMCF, use="complete.obs",
method="spearman")
```

Spearman's rank correlation rho

```
data: epi$F7postop and epi$Prov2fibtemMCF
S = 4154.7, p-value = 0.3829
alternative hypothesis: true rho is not equal to 0
sample estimates:
      rho
0.1623541
```

Warning message:

```
In cor.test.default(epi$F7postop, epi$Prov2fibtemMCF, use = "complete.obs", :
  Cannot compute exact p-value with ties
> #RESULT:
> plot(epi$F7postop, epi$Prov2fibtemMCF, xlab="", ylab = "", cex.axis=3,
cex=2.5, pch=19, axes=F)
> axis(side=1,lwd=4,cex.axis=3, labels=NA)
> axis(side=1,lwd=0,cex.axis=3, line=1)
> axis(side=2,lwd=4,cex.axis=3, labels=NA)
```

```
> axis(side=2,lwd=0,cex.axis=3, line=0)
>
>
> #F9 vs EXTEM-MCF
> cor.test(eps$F9postop, eps$Prov2extemMCF, use="complete.obs",
method="pearson")
```

Pearson's product-moment correlation

```
data: eps$F9postop and eps$Prov2extemMCF
t = 2.1374, df = 29, p-value = 0.04113
alternative hypothesis: true correlation is not equal to 0
95 percent confidence interval:
 0.0167591 0.6396360
sample estimates:
      cor
0.3689085
```

```
> cor.test(eps$F9postop, eps$Prov2extemMCF, use="complete.obs",
method="spearman")
```

Spearman's rank correlation rho

```
data: eps$F9postop and eps$Prov2extemMCF
S = 3572.5, p-value = 0.1275
alternative hypothesis: true rho is not equal to 0
sample estimates:
      rho
0.279731
```

Warning message:

```
In cor.test.default(eps$F9postop, eps$Prov2extemMCF, use = "complete.obs", :
  Cannot compute exact p-value with ties
```

```
> #RESULT:
> plot(eps$F9postop, eps$Prov2extemMCF, xlab="", ylab = "", cex.axis=3,
cex=2.5, pch=19, axes=F,abline(lm(eps$Prov2extemMCF~ eps
$F9postop),lwd=3,lty=2))
> axis(side=1,lwd=4,cex.axis=3, labels=NA)
> axis(side=1,lwd=0,cex.axis=3, line=1)
> axis(side=2,lwd=4,cex.axis=3, labels=NA)
> axis(side=2,lwd=0,cex.axis=3, line=0)
> text(2,63,"r=0.37*",cex=7)
>
> #F9 vs EXTEM-CT
> cor.test(eps$F9postop, eps$Prov2extemCT, use="complete.obs",
method="pearson")
```

Pearson's product-moment correlation

```
data: eps$F9postop and eps$Prov2extemCT
t = -0.32209, df = 29, p-value = 0.7497
alternative hypothesis: true correlation is not equal to 0
95 percent confidence interval:
 -0.4054660 0.3010043
sample estimates:
      cor
```

-0.05970371

```
> cor.test(emi$F9postop, emi$Prov2extemCT, use="complete.obs",  
method="spearman")
```

Spearman's rank correlation rho

```
data: emi$F9postop and emi$Prov2extemCT  
S = 5615.2, p-value = 0.4787  
alternative hypothesis: true rho is not equal to 0  
sample estimates:  
rho  
-0.1320947
```

Warning message:

```
In cor.test.default(emi$F9postop, emi$Prov2extemCT, use = "complete.obs", :  
Cannot compute exact p-value with ties
```

```
> #RESULT:  
> plot(emi$F9postop, emi$Prov2extemCT, xlab="", ylab = "", cex.axis=3, cex=2.5,  
pch=19, axes=F)  
> axis(side=1,lwd=4,cex.axis=3, labels=NA)  
> axis(side=1,lwd=0,cex.axis=3, line=1)  
> axis(side=2,lwd=4,cex.axis=3, labels=NA)  
> axis(side=2,lwd=0,cex.axis=3, line=0)  
>  
> #F9 vs INTEM-CT  
> cor.test(emi$F9postop, emi$Prov2intemCT, use="complete.obs",  
method="pearson")
```

Pearson's product-moment correlation

```
data: emi$F9postop and emi$Prov2intemCT  
t = -0.77183, df = 29, p-value = 0.4465  
alternative hypothesis: true correlation is not equal to 0  
95 percent confidence interval:  
-0.4724640 0.2237109  
sample estimates:  
cor  
-0.1418756
```

```
> cor.test(emi$F9postop, emi$Prov2intemCT, use="complete.obs",  
method="spearman")
```

Spearman's rank correlation rho

```
data: emi$F9postop and emi$Prov2intemCT  
S = 4669.9, p-value = 0.7546  
alternative hypothesis: true rho is not equal to 0  
sample estimates:  
rho  
0.05849723
```

Warning message:

```
In cor.test.default(emi$F9postop, emi$Prov2intemCT, use = "complete.obs", :  
Cannot compute exact p-value with ties
```

```
> #RESULT:
```

```

> plot(epi$F9postop, epi$Prov2intemCT, xlab="", ylab = "", cex.axis=3, cex=2.5,
pch=19, axes=F)
> axis(side=1,lwd=4,cex.axis=3, labels=NA)
> axis(side=1,lwd=0,cex.axis=3, line=1)
> axis(side=2,lwd=4,cex.axis=3, labels=NA)
> axis(side=2,lwd=0,cex.axis=3, line=0)
>
> #F9 vs FIBTEM-MCF
> cor.test(epi$F9postop, epi$Prov2intemMCF, use="complete.obs",
method="pearson")

```

Pearson's product-moment correlation

```

data: epi$F9postop and epi$Prov2intemMCF
t = -0.79539, df = 29, p-value = 0.4328
alternative hypothesis: true correlation is not equal to 0
95 percent confidence interval:
 -0.4758202  0.2195940
sample estimates:
      cor
-0.1461155

```

```

> cor.test(epi$F9postop, epi$Prov2intemMCF, use="complete.obs",
method="spearman")

```

Spearman's rank correlation rho

```

data: epi$F9postop and epi$Prov2intemMCF
S = 4941.9, p-value = 0.9845
alternative hypothesis: true rho is not equal to 0
sample estimates:
      rho
0.003645607

```

Warning message:

```

In cor.test.default(epi$F9postop, epi$Prov2intemMCF, use = "complete.obs", :
  Cannot compute exact p-value with ties

```

```

> #RESULT:
> plot(epi$F9postop, epi$Prov2intemMCF, xlab="", ylab = "", cex.axis=3,
cex=2.5, pch=19, axes=F)
> axis(side=1,lwd=4,cex.axis=3, labels=NA)
> axis(side=1,lwd=0,cex.axis=3, line=1)
> axis(side=2,lwd=4,cex.axis=3, labels=NA)
> axis(side=2,lwd=0,cex.axis=3, line=0)
>
>
> #F10 vs EXTEM-MCF
> cor.test(epi$F10postop, epi$Prov2extemMCF, use="complete.obs",
method="pearson")

```

Pearson's product-moment correlation

```

data: epi$F10postop and epi$Prov2extemMCF
t = 2.4071, df = 29, p-value = 0.02267
alternative hypothesis: true correlation is not equal to 0
95 percent confidence interval:

```



```
0.06282767 0.66610425
sample estimates:
  cor
0.4080829
```

```
> cor.test(epi$F10postop, epi$Prov2extemMCF, use="complete.obs",
method="spearman")
```

Spearman's rank correlation rho

```
data: epi$F10postop and epi$Prov2extemMCF
S = 3348.5, p-value = 0.07453
alternative hypothesis: true rho is not equal to 0
sample estimates:
  rho
0.3249012
```

Warning message:

```
In cor.test.default(epi$F10postop, epi$Prov2extemMCF, use = "complete.obs", :
  Cannot compute exact p-value with ties
```

```
> #RESULT:
> plot(epi$F10postop, epi$Prov2extemMCF, xlab="", ylab = "", cex.axis=3,
cex=2.5, pch=19, axes=F,abline(lm(epi$Prov2extemMCF~ epi
$F10postop),lwd=3,lty=2))
> axis(side=1,lwd=4,cex.axis=3, labels=NA)
> axis(side=1,lwd=0,cex.axis=3, line=1)
> axis(side=2,lwd=4,cex.axis=3, labels=NA)
> axis(side=2,lwd=0,cex.axis=3, line=0)
> text(1.2,58,"r=0.41*",cex=7)
>
> #F10 vs EXTEM-CT
> cor.test(epi$F10postop, epi$Prov2extemCT, use="complete.obs",
method="pearson")
```

Pearson's product-moment correlation

```
data: epi$F10postop and epi$Prov2extemCT
t = -0.74502, df = 29, p-value = 0.4623
alternative hypothesis: true correlation is not equal to 0
95 percent confidence interval:
 -0.4686249 0.2283897
sample estimates:
  cor
-0.1370408
```

```
> cor.test(epi$F10postop, epi$Prov2extemCT, use="complete.obs",
method="spearman")
```

Spearman's rank correlation rho

```
data: epi$F10postop and epi$Prov2extemCT
S = 6103.2, p-value = 0.2122
alternative hypothesis: true rho is not equal to 0
sample estimates:
  rho
-0.2304821
```

Warning message:

```
In cor.test.default(epi$F10postop, epi$Prov2extemCT, use = "complete.obs", :  
  Cannot compute exact p-value with ties
```

```
> #RESULT:  
> plot(epi$F10postop, epi$Prov2extemCT, xlab="", ylab = "", cex.axis=3,  
cex=2.5, pch=19, axes=F)  
> axis(side=1,lwd=4,cex.axis=3, labels=NA)  
> axis(side=1,lwd=0,cex.axis=3, line=1)  
> axis(side=2,lwd=4,cex.axis=3, labels=NA)  
> axis(side=2,lwd=0,cex.axis=3, line=0)  
>  
> #F10 vs INTEM-CT  
> cor.test(epi$F10postop, epi$Prov2intemCT, use="complete.obs",  
method="pearson")
```

Pearson's product-moment correlation

```
data: epi$F10postop and epi$Prov2intemCT  
t = -0.32822, df = 29, p-value = 0.7451  
alternative hypothesis: true correlation is not equal to 0  
95 percent confidence interval:  
 -0.4064152  0.2999704  
sample estimates:  
      cor  
-0.06083604
```

```
> cor.test(epi$F10postop, epi$Prov2intemCT, use="complete.obs",  
method="spearman")
```

Spearman's rank correlation rho

```
data: epi$F10postop and epi$Prov2intemCT  
S = 4909, p-value = 0.9562  
alternative hypothesis: true rho is not equal to 0  
sample estimates:  
      rho  
0.01028848
```

Warning message:

```
In cor.test.default(epi$F10postop, epi$Prov2intemCT, use = "complete.obs", :  
  Cannot compute exact p-value with ties
```

```
> #RESULT:  
> plot(epi$F10postop, epi$Prov2intemCT, xlab="", ylab = "", cex.axis=3,  
cex=2.5, pch=19, axes=F)  
> axis(side=1,lwd=4,cex.axis=3, labels=NA)  
> axis(side=1,lwd=0,cex.axis=3, line=1)  
> axis(side=2,lwd=4,cex.axis=3, labels=NA)  
> axis(side=2,lwd=0,cex.axis=3, line=0)  
>  
> #F10 vs FIBTEM-MCF  
> cor.test(epi$F10postop, epi$Prov2intemMCF, use="complete.obs",  
method="pearson")
```

Pearson's product-moment correlation

```
data: epi$F10postop and epi$Prov2intemMCF
t = 0.59596, df = 29, p-value = 0.5558
alternative hypothesis: true correlation is not equal to 0
95 percent confidence interval:
```

```
-0.2542543  0.4469167
```

```
sample estimates:
```

```
cor
0.1099956
```

```
> cor.test(epi$F10postop, epi$Prov2intemMCF, use="complete.obs",
method="spearman")
```

Spearman's rank correlation rho

```
data: epi$F10postop and epi$Prov2intemMCF
S = 4177.4, p-value = 0.3966
alternative hypothesis: true rho is not equal to 0
sample estimates:
```

```
rho
0.1577897
```

Warning message:

```
In cor.test.default(epi$F10postop, epi$Prov2intemMCF, use = "complete.obs", :
  Cannot compute exact p-value with ties
```

```
> #RESULT:
```

```
> plot(epi$F10postop, epi$Prov2intemMCF, xlab="", ylab = "", cex.axis=3,
cex=2.5, pch=19, axes=F)
```

```
> axis(side=1,lwd=4,cex.axis=3, labels=NA)
```

```
> axis(side=1,lwd=0,cex.axis=3, line=1)
```

```
> axis(side=2,lwd=4,cex.axis=3, labels=NA)
```

```
> axis(side=2,lwd=0,cex.axis=3, line=0)
```

```
>
```

```
>
```

```
> #F11 vs EXTEM-MCF
```

```
> cor.test(epi$F11postop, epi$Prov2extemMCF, use="complete.obs",
method="pearson")
```

Pearson's product-moment correlation

```
data: epi$F11postop and epi$Prov2extemMCF
t = 1.7109, df = 29, p-value = 0.09778
alternative hypothesis: true correlation is not equal to 0
95 percent confidence interval:
```

```
-0.05774782  0.59345628
```

```
sample estimates:
```

```
cor
0.3027881
```

```
> cor.test(epi$F11postop, epi$Prov2extemMCF, use="complete.obs",
method="spearman")
```

Spearman's rank correlation rho

```
data: epi$F11postop and epi$Prov2extemMCF
S = 4471, p-value = 0.5978
alternative hypothesis: true rho is not equal to 0
```

```
sample estimates:
      rho
0.09858373
```

Warning message:

```
In cor.test.default(epi$F11postop, epi$Prov2extemMCF, use = "complete.obs", :
  Cannot compute exact p-value with ties
```

```
> #RESULT:
> plot(epi$F11postop, epi$Prov2extemMCF, xlab="", ylab = "", cex.axis=3,
cex=2.5, pch=19, axes=F)
> axis(side=1,lwd=4,cex.axis=3, labels=NA)
> axis(side=1,lwd=0,cex.axis=3, line=1)
> axis(side=2,lwd=4,cex.axis=3, labels=NA)
> axis(side=2,lwd=0,cex.axis=3, line=0)
>
>
> #F11 vs EXTEM-CT
> cor.test(epi$F11postop, epi$Prov2extemCT, use="complete.obs",
method="pearson")
```

Pearson's product-moment correlation

```
data: epi$F11postop and epi$Prov2extemCT
t = -0.91083, df = 29, p-value = 0.3699
alternative hypothesis: true correlation is not equal to 0
95 percent confidence interval:
 -0.4920325  0.1993526
sample estimates:
      cor
-0.1667678
```

```
> cor.test(epi$F11postop, epi$Prov2extemCT, use="complete.obs",
method="spearman")
```

Spearman's rank correlation rho

```
data: epi$F11postop and epi$Prov2extemCT
S = 6159.3, p-value = 0.19
alternative hypothesis: true rho is not equal to 0
sample estimates:
      rho
-0.2417941
```

Warning message:

```
In cor.test.default(epi$F11postop, epi$Prov2extemCT, use = "complete.obs", :
  Cannot compute exact p-value with ties
```

```
> #RESULT:
> plot(epi$F11postop, epi$Prov2extemCT, xlab="", ylab = "", cex.axis=3,
cex=2.5, pch=19, axes=F)
> axis(side=1,lwd=4,cex.axis=3, labels=NA)
> axis(side=1,lwd=0,cex.axis=3, line=1)
> axis(side=2,lwd=4,cex.axis=3, labels=NA)
> axis(side=2,lwd=0,cex.axis=3, line=0)
>
>
> #F11 vs INTEM-CT
> cor.test(epi$F11postop, epi$Prov2intemCT, use="complete.obs",
```

```
method="pearson")
```

Pearson's product-moment correlation

```
data: epi$F11postop and epi$Prov2intemCT
t = -0.030361, df = 29, p-value = 0.976
alternative hypothesis: true correlation is not equal to 0
95 percent confidence interval:
 -0.3592603  0.3494003
sample estimates:
      cor
-0.005637846
```

```
> cor.test(epi$F11postop, epi$Prov2intemCT, use="complete.obs",
method="spearman")
```

Spearman's rank correlation rho

```
data: epi$F11postop and epi$Prov2intemCT
S = 4709.8, p-value = 0.7876
alternative hypothesis: true rho is not equal to 0
sample estimates:
      rho
0.05043373
```

Warning message:

```
In cor.test.default(epi$F11postop, epi$Prov2intemCT, use = "complete.obs", :
  Cannot compute exact p-value with ties
```

```
> #RESULT:
```

```
> plot(epi$F11postop, epi$Prov2intemCT, xlab="", ylab = "", cex.axis=3,
cex=2.5, pch=19, axes=F)
```

```
> axis(side=1,lwd=4,cex.axis=3, labels=NA)
```

```
> axis(side=1,lwd=0,cex.axis=3, line=1)
```

```
> axis(side=2,lwd=4,cex.axis=3, labels=NA)
```

```
> axis(side=2,lwd=0,cex.axis=3, line=0)
```

```
>
```

```
> #F11 vs FIBTEM-MCF
```

```
> cor.test(epi$F11postop, epi$Prov2fibtemMCF, use="complete.obs",
method="pearson")
```

Pearson's product-moment correlation

```
data: epi$F11postop and epi$Prov2fibtemMCF
t = 2.5389, df = 29, p-value = 0.01674
alternative hypothesis: true correlation is not equal to 0
95 percent confidence interval:
 0.08493867 0.67829026
sample estimates:
      cor
0.426444
```

```
> cor.test(epi$F11postop, epi$Prov2fibtemMCF, use="complete.obs",
method="spearman")
```

Spearman's rank correlation rho

```
data: epi$F11postop and epi$Prov2fibtemMCF
S = 3423.5, p-value = 0.08991
alternative hypothesis: true rho is not equal to 0
sample estimates:
      rho
0.3097777
```

Warning message:

```
In cor.test.default(epi$F11postop, epi$Prov2fibtemMCF, use = "complete.obs", :
  Cannot compute exact p-value with ties
```

```
> #RESULT:
> plot(epi$F11postop, epi$Prov2fibtemMCF, xlab="", ylab = "", cex.axis=3,
cex=2.5, pch=19, axes=F,abline(lm(epi$Prov2fibtemMCF~ epi
$F11postop),lwd=3,lty=2))
> axis(side=1,lwd=4,cex.axis=3, labels=NA)
> axis(side=1,lwd=0,cex.axis=3, line=1)
> axis(side=2,lwd=4,cex.axis=3, labels=NA)
> axis(side=2,lwd=0,cex.axis=3, line=0)
> text(1.5,19,"r=0.43*",cex=6)
>
> #F12 vs EXTEM-MCF
> cor.test(epi$F12postop, epi$Prov2extemMCF, use="complete.obs",
method="pearson")
```

Pearson's product-moment correlation

```
data: epi$F12postop and epi$Prov2extemMCF
t = 0.13599, df = 29, p-value = 0.8928
alternative hypothesis: true correlation is not equal to 0
95 percent confidence interval:
 -0.3320659  0.3762193
sample estimates:
      cor
0.02524455
```

```
> cor.test(epi$F12postop, epi$Prov2extemMCF, use="complete.obs",
method="spearman")
```

Spearman's rank correlation rho

```
data: epi$F12postop and epi$Prov2extemMCF
S = 5598.5, p-value = 0.4901
alternative hypothesis: true rho is not equal to 0
sample estimates:
      rho
-0.1287329
```

Warning message:

```
In cor.test.default(epi$F12postop, epi$Prov2extemMCF, use = "complete.obs", :
  Cannot compute exact p-value with ties
```

```
> #RESULT:
> plot(epi$F12postop, epi$Prov2extemMCF, xlab="", ylab = "", cex.axis=3,
cex=2.5, pch=19, axes=F)
> axis(side=1,lwd=4,cex.axis=3, labels=NA)
> axis(side=1,lwd=0,cex.axis=3, line=1)
> axis(side=2,lwd=4,cex.axis=3, labels=NA)
```

```
> axis(side=2,lwd=0,cex.axis=3, line=0)
>
> #F12 vs EXTEM-CT
> cor.test(emi$F12postop, emi$Prov2extemCT, use="complete.obs",
method="pearson")
```

Pearson's product-moment correlation

```
data: emi$F12postop and emi$Prov2extemCT
t = -1.6107, df = 29, p-value = 0.1181
alternative hypothesis: true correlation is not equal to 0
95 percent confidence interval:
 -0.58181687  0.07544813
sample estimates:
      cor
-0.2865528
```

```
> cor.test(emi$F12postop, emi$Prov2extemCT, use="complete.obs",
method="spearman")
```

Spearman's rank correlation rho

```
data: emi$F12postop and emi$Prov2extemCT
S = 6426.7, p-value = 0.1063
alternative hypothesis: true rho is not equal to 0
sample estimates:
      rho
-0.2956983
```

Warning message:

```
In cor.test.default(emi$F12postop, emi$Prov2extemCT, use = "complete.obs", :
  Cannot compute exact p-value with ties
```

```
> #RESULT:
> plot(emi$F12postop, emi$Prov2extemCT, xlab="", ylab = "", cex.axis=3,
cex=2.5, pch=19, axes=F)
> axis(side=1,lwd=4,cex.axis=3, labels=NA)
> axis(side=1,lwd=0,cex.axis=3, line=1)
> axis(side=2,lwd=4,cex.axis=3, labels=NA)
> axis(side=2,lwd=0,cex.axis=3, line=0)
>
> #F12 vs INTEM-CT
> cor.test(emi$F12postop, emi$Prov2intemCT, use="complete.obs",
method="pearson")
```

Pearson's product-moment correlation

```
data: emi$F12postop and emi$Prov2intemCT
t = 0.94101, df = 29, p-value = 0.3545
alternative hypothesis: true correlation is not equal to 0
95 percent confidence interval:
 -0.1940427  0.4962075
sample estimates:
      cor
0.1721328
```

```
> cor.test(emi$F12postop, emi$Prov2intemCT, use="complete.obs",
```

```
method="spearman")
```

Spearman's rank correlation rho

```
data: epi$F12postop and epi$Prov2intemCT
S = 4698.9, p-value = 0.7785
alternative hypothesis: true rho is not equal to 0
sample estimates:
      rho
0.05264751
```

Warning message:

```
In cor.test.default(epi$F12postop, epi$Prov2intemCT, use = "complete.obs", :
  Cannot compute exact p-value with ties
> #RESULT:
> plot(epi$F12postop, epi$Prov2intemCT, xlab="", ylab = "", cex.axis=3,
cex=2.5, pch=19, axes=F)
> axis(side=1,lwd=4,cex.axis=3, labels=NA)
> axis(side=1,lwd=0,cex.axis=3, line=1)
> axis(side=2,lwd=4,cex.axis=3, labels=NA)
> axis(side=2,lwd=0,cex.axis=3, line=0)
>
> #F12 vs FIBTEM-MCF
> cor.test(epi$F12postop, epi$Prov2fibtemMCF, use="complete.obs",
method="pearson")
```

Pearson's product-moment correlation

```
data: epi$F12postop and epi$Prov2fibtemMCF
t = 0.41489, df = 29, p-value = 0.6813
alternative hypothesis: true correlation is not equal to 0
95 percent confidence interval:
 -0.2852892  0.4197317
sample estimates:
      cor
0.07681624
```

```
> cor.test(epi$F12postop, epi$Prov2fibtemMCF, use="complete.obs",
method="spearman")
```

Spearman's rank correlation rho

```
data: epi$F12postop and epi$Prov2fibtemMCF
S = 4808.6, p-value = 0.8705
alternative hypothesis: true rho is not equal to 0
sample estimates:
      rho
0.03052984
```

Warning message:

```
In cor.test.default(epi$F12postop, epi$Prov2fibtemMCF, use = "complete.obs", :
  Cannot compute exact p-value with ties
> #RESULT:
> plot(epi$F12postop, epi$Prov2fibtemMCF, xlab="", ylab = "", cex.axis=3,
cex=2.5, pch=19, axes=F)
> axis(side=1,lwd=4,cex.axis=3, labels=NA)
```



```

> axis(side=1,lwd=0,cex.axis=3, line=1)
> axis(side=2,lwd=4,cex.axis=3, labels=NA)
> axis(side=2,lwd=0,cex.axis=3, line=0)
>
>
>
>
> #F13 vs EXTEM-MCF
> cor.test(emi$F13postop, emi$Prov2extemMCF, use="complete.obs",
method="pearson")

```

Pearson's product-moment correlation

```

data: emi$F13postop and emi$Prov2extemMCF
t = 2.6074, df = 29, p-value = 0.01426
alternative hypothesis: true correlation is not equal to 0
95 percent confidence interval:
 0.09631896 0.68443758
sample estimates:
      cor
0.4357859

```

```

> cor.test(emi$F13postop, emi$Prov2extemMCF, use="complete.obs",
method="spearman")

```

Spearman's rank correlation rho

```

data: emi$F13postop and emi$Prov2extemMCF
S = 3359.7, p-value = 0.07668
alternative hypothesis: true rho is not equal to 0
sample estimates:
      rho
0.3226419

```

Warning message:

```

In cor.test.default(emi$F13postop, emi$Prov2extemMCF, use = "complete.obs", :
  Cannot compute exact p-value with ties

```

```

> #RESULT:
> plot(emi$F13postop, emi$Prov2extemMCF, xlab="", ylab = "", cex.axis=3,
cex=2.5, pch=19, axes=F,abline(lm(emi$Prov2extemMCF~ emi
$F13postop),lwd=3,lty=2))
> axis(side=1,lwd=4,cex.axis=3, labels=NA)
> axis(side=1,lwd=0,cex.axis=3, line=1)
> axis(side=2,lwd=4,cex.axis=3, labels=NA)
> axis(side=2,lwd=0,cex.axis=3, line=0)
> text(1,60,"r=0.44*",cex=6)
>
>
> #F13 vs EXTEM-CT
> cor.test(emi$F13postop, emi$Prov2extemCT, use="complete.obs",
method="pearson")

```

Pearson's product-moment correlation

```

data: emi$F13postop and emi$Prov2extemCT
t = -0.96615, df = 29, p-value = 0.342

```

alternative hypothesis: true correlation is not equal to 0  
95 percent confidence interval:

-0.4996641 0.1896156

sample estimates:

cor  
-0.1765892

```
> cor.test(epi$F13postop, epi$Prov2extemCT, use="complete.obs",  
method="spearman")
```

Spearman's rank correlation rho

data: epi\$F13postop and epi\$Prov2extemCT

S = 5848.6, p-value = 0.3349

alternative hypothesis: true rho is not equal to 0

sample estimates:

rho  
-0.179156

Warning message:

```
In cor.test.default(epi$F13postop, epi$Prov2extemCT, use = "complete.obs", :  
Cannot compute exact p-value with ties
```

```
> #RESULT:
```

```
> plot(epi$F13postop, epi$Prov2extemCT, xlab="", ylab = "", cex.axis=3,  
cex=2.5, pch=19, axes=F)
```

```
> axis(side=1,lwd=4,cex.axis=3, labels=NA)
```

```
> axis(side=1,lwd=0,cex.axis=3, line=1)
```

```
> axis(side=2,lwd=4,cex.axis=3, labels=NA)
```

```
> axis(side=2,lwd=0,cex.axis=3, line=0)
```

```
>
```

```
> #F13 vs INTEM-CT
```

```
> cor.test(epi$F13postop, epi$Prov2intemCT, use="complete.obs",  
method="pearson")
```

Pearson's product-moment correlation

data: epi\$F13postop and epi\$Prov2intemCT

t = 0.18351, df = 29, p-value = 0.8557

alternative hypothesis: true correlation is not equal to 0

95 percent confidence interval:

-0.3241954 0.3837659

sample estimates:

cor  
0.03405699

```
> cor.test(epi$F13postop, epi$Prov2intemCT, use="complete.obs",  
method="spearman")
```

Spearman's rank correlation rho

data: epi\$F13postop and epi\$Prov2intemCT

S = 4576.8, p-value = 0.6795

alternative hypothesis: true rho is not equal to 0

sample estimates:

rho  
0.07725669

Warning message:

```
In cor.test.default(epi$F13postop, epi$Prov2intemCT, use = "complete.obs", :  
  Cannot compute exact p-value with ties
```

```
> #RESULT:  
> plot(epi$F13postop, epi$Prov2intemCT, xlab="", ylab = "", cex.axis=3,  
cex=2.5, pch=19, axes=F)  
> axis(side=1,lwd=4,cex.axis=3, labels=NA)  
> axis(side=1,lwd=0,cex.axis=3, line=1)  
> axis(side=2,lwd=4,cex.axis=3, labels=NA)  
> axis(side=2,lwd=0,cex.axis=3, line=0)  
>  
> #F13 vs FIBTEM-MCF  
> cor.test(epi$F13postop, epi$Prov2fibtemMCF, use="complete.obs",  
method="pearson")
```

Pearson's product-moment correlation

```
data: epi$F13postop and epi$Prov2fibtemMCF  
t = 2.8328, df = 29, p-value = 0.008309  
alternative hypothesis: true correlation is not equal to 0  
95 percent confidence interval:  
 0.1331763 0.7037890  
sample estimates:  
 cor  
0.4655473
```

```
> cor.test(epi$F13postop, epi$Prov2fibtemMCF, use="complete.obs",  
method="spearman")
```

Spearman's rank correlation rho

```
data: epi$F13postop and epi$Prov2fibtemMCF  
S = 2650.5, p-value = 0.008296  
alternative hypothesis: true rho is not equal to 0  
sample estimates:  
 rho  
0.4656307
```

Warning message:

```
In cor.test.default(epi$F13postop, epi$Prov2fibtemMCF, use = "complete.obs", :  
  Cannot compute exact p-value with ties
```

```
> #RESULT:  
> plot(epi$F13postop, epi$Prov2fibtemMCF, xlab="", ylab = "", cex.axis=3,  
cex=2.5, pch=19, axes=F,abline(lm(epi$Prov2fibtemMCF~ epi  
$F13postop)),lwd=3,lty=2)  
> axis(side=1,lwd=4,cex.axis=3, labels=NA)  
> axis(side=1,lwd=0,cex.axis=3, line=1)  
> axis(side=2,lwd=4,cex.axis=3, labels=NA)  
> axis(side=2,lwd=0,cex.axis=3, line=0)  
> text(.85,20,"Rho=0.47**",cex=6)  
>  
>  
>  
>  
>
```

```
> #EXTEM-MCF vs PT-INR
> cor.test(emi$Prov2extemMCF, emi$Prov2rutinPK, use="complete.obs",
method="pearson")
```

Pearson's product-moment correlation

```
data: emi$Prov2extemMCF and emi$Prov2rutinPK
t = -1.4426, df = 31, p-value = 0.1592
alternative hypothesis: true correlation is not equal to 0
95 percent confidence interval:
 -0.5470235  0.1012061
sample estimates:
      cor
-0.2508175
```

```
> cor.test(emi$Prov2extemMCF, emi$Prov2rutinPK, use="complete.obs",
method="spearman")
```

Spearman's rank correlation rho

```
data: emi$Prov2extemMCF and emi$Prov2rutinPK
S = 6546.7, p-value = 0.6027
alternative hypothesis: true rho is not equal to 0
sample estimates:
      rho
-0.09402775
```

Warning message:

```
In cor.test.default(emi$Prov2extemMCF, emi$Prov2rutinPK, use =
"complete.obs", :
```

```
Cannot compute exact p-value with ties
```

```
> #RESULT:
```

```
> plot(emi$Prov2extemMCF, emi$Prov2rutinPK, xlab="", ylab = "", cex.axis=3,
cex=2.5, pch=19, axes=F)
```

```
> axis(side=1,lwd=4,cex.axis=3, labels=NA)
```

```
> axis(side=1,lwd=0,cex.axis=3, line=1)
```

```
> axis(side=2,lwd=4,cex.axis=3, labels=NA)
```

```
> axis(side=2,lwd=0,cex.axis=3, line=0)
```

```
>
```

```
> #EXTEM-MCF vs aPTT
```

```
> cor.test(emi$Prov2extemMCF, emi$Prov2rutinAPTT, use="complete.obs",
method="pearson")
```

Pearson's product-moment correlation

```
data: emi$Prov2extemMCF and emi$Prov2rutinAPTT
t = -0.16956, df = 31, p-value = 0.8665
alternative hypothesis: true correlation is not equal to 0
95 percent confidence interval:
 -0.3698837  0.3161730
sample estimates:
      cor
-0.03044012
```

```
> cor.test(emi$Prov2extemMCF, emi$Prov2rutinAPTT, use="complete.obs",
method="spearman")
```

Spearman's rank correlation rho

```
data: epi$Prov2extemMCF and epi$Prov2rutinAPTT
S = 5841.2, p-value = 0.8951
alternative hypothesis: true rho is not equal to 0
sample estimates:
      rho
0.02386784
```

Warning message:

```
In cor.test.default(epi$Prov2extemMCF, epi$Prov2rutinAPTT, use =
"complete.obs", :
```

```
Cannot compute exact p-value with ties
```

```
> #RESULT:
```

```
> plot(epi$Prov2extemMCF, epi$Prov2rutinAPTT, xlab="", ylab = "", cex.axis=3,
cex=2.5, pch=19, axes=F)
```

```
> axis(side=1,lwd=4,cex.axis=3, labels=NA)
```

```
> axis(side=1,lwd=0,cex.axis=3, line=1)
```

```
> axis(side=2,lwd=4,cex.axis=3, labels=NA)
```

```
> axis(side=2,lwd=0,cex.axis=3, line=0)
```

```
>
```

```
> #EXTEM-MCF vs PIVKA
```

```
> cor.test(epi$Prov2extemMCF, epi$PIVKAMpostop, use="complete.obs",
method="pearson")
```

Pearson's product-moment correlation

```
data: epi$Prov2extemMCF and epi$PIVKAMpostop
t = -0.89872, df = 29, p-value = 0.3762
alternative hypothesis: true correlation is not equal to 0
95 percent confidence interval:
 -0.4903501  0.2014808
sample estimates:
      cor
-0.1646114
```

```
> cor.test(epi$Prov2extemMCF, epi$PIVKAMpostop, use="complete.obs",
method="spearman")
```

Spearman's rank correlation rho

```
data: epi$Prov2extemMCF and epi$PIVKAMpostop
S = 6448.9, p-value = 0.1009
alternative hypothesis: true rho is not equal to 0
sample estimates:
      rho
-0.3001744
```

Warning message:

```
In cor.test.default(epi$Prov2extemMCF, epi$PIVKAMpostop, use =
"complete.obs", :
```

```
Cannot compute exact p-value with ties
```

```
> #RESULT:
```

```
> plot(epi$Prov2extemMCF, epi$PIVKAMpostop, xlab="", ylab = "", cex.axis=3,
cex=2.5, pch=19, axes=F)
```

```

> axis(side=1,lwd=4,cex.axis=3, labels=NA)
> axis(side=1,lwd=0,cex.axis=3, line=1)
> axis(side=2,lwd=4,cex.axis=3, labels=NA)
> axis(side=2,lwd=0,cex.axis=3, line=0)
>
> #EXTEM-MCF vs CRP
> cor.test(eps$Prov2extemMCF, eps$Prov2rutinCRP, use="complete.obs",
method="pearson")

```

Pearson's product-moment correlation

```

data: eps$Prov2extemMCF and eps$Prov2rutinCRP
t = -0.58792, df = 28, p-value = 0.5613
alternative hypothesis: true correlation is not equal to 0
95 percent confidence interval:
 -0.4526865  0.2601939
sample estimates:
      cor
-0.1104267

```

```

> cor.test(eps$Prov2extemMCF, eps$Prov2rutinCRP, use="complete.obs",
method="spearman")

```

Spearman's rank correlation rho

```

data: eps$Prov2extemMCF and eps$Prov2rutinCRP
S = 4299.5, p-value = 0.8194
alternative hypothesis: true rho is not equal to 0
sample estimates:
      rho
0.04350263

```

Warning message:

```

In cor.test.default(eps$Prov2extemMCF, eps$Prov2rutinCRP, use =
"complete.obs", :

```

```

  Cannot compute exact p-value with ties

```

```

> #RESULT:
> plot(eps$Prov2extemMCF, eps$Prov2rutinCRP, xlab="", ylab = "", cex.axis=3,
cex=2.5, pch=19, axes=F)
> axis(side=1,lwd=4,cex.axis=3, labels=NA)
> axis(side=1,lwd=0,cex.axis=3, line=1)
> axis(side=2,lwd=4,cex.axis=3, labels=NA)
> axis(side=2,lwd=0,cex.axis=3, line=0)
>
>
>
> #EXTEM-CT vs PT-INR
> cor.test(eps$Prov2extemCT, eps$Prov2rutinPK, use="complete.obs",
method="pearson")

```

Pearson's product-moment correlation

```

data: eps$Prov2extemCT and eps$Prov2rutinPK
t = 1.1177, df = 31, p-value = 0.2723
alternative hypothesis: true correlation is not equal to 0
95 percent confidence interval:

```

```
-0.1571117 0.5059370
sample estimates:
      cor
0.1968129
```

```
> cor.test(eps$Prov2extemCT, eps$Prov2rutinPK, use="complete.obs",
method="spearman")
```

Spearman's rank correlation rho

```
data: eps$Prov2extemCT and eps$Prov2rutinPK
S = 5462.4, p-value = 0.6296
alternative hypothesis: true rho is not equal to 0
sample estimates:
      rho
0.08716727
```

Warning message:

```
In cor.test.default(eps$Prov2extemCT, eps$Prov2rutinPK, use =
"complete.obs", :
  Cannot compute exact p-value with ties
```

```
> #RESULT:
> plot(eps$Prov2extemCT, eps$Prov2rutinPK, xlab="", ylab = "", cex.axis=3,
cex=2.5, pch=19, axes=F)
> axis(side=1,lwd=4,cex.axis=3, labels=NA)
> axis(side=1,lwd=0,cex.axis=3, line=1)
> axis(side=2,lwd=4,cex.axis=3, labels=NA)
> axis(side=2,lwd=0,cex.axis=3, line=0)
>
> #EXTEM-CT vs aPTT
> cor.test(eps$Prov2extemCT, eps$Prov2rutinAPTT, use="complete.obs",
method="pearson")
```

Pearson's product-moment correlation

```
data: eps$Prov2extemCT and eps$Prov2rutinAPTT
t = 0.96335, df = 31, p-value = 0.3428
alternative hypothesis: true correlation is not equal to 0
95 percent confidence interval:
 -0.1835627 0.4853891
sample estimates:
      cor
0.1704904
```

```
> cor.test(eps$Prov2extemCT, eps$Prov2rutinAPTT, use="complete.obs",
method="spearman")
```

Spearman's rank correlation rho

```
data: eps$Prov2extemCT and eps$Prov2rutinAPTT
S = 6474.8, p-value = 0.65
alternative hypothesis: true rho is not equal to 0
sample estimates:
      rho
-0.08202175
```

```

Warning message:
In cor.test.default(epi$Prov2extemCT, epi$Prov2rutinAPTT, use =
"complete.obs", :
  Cannot compute exact p-value with ties
> #RESULT:
> plot(epi$Prov2extemCT, epi$Prov2rutinAPTT, xlab="", ylab = "", cex.axis=3,
cex=2.5, pch=19, axes=F)
> axis(side=1,lwd=4,cex.axis=3, labels=NA)
> axis(side=1,lwd=0,cex.axis=3, line=1)
> axis(side=2,lwd=4,cex.axis=3, labels=NA)
> axis(side=2,lwd=0,cex.axis=3, line=0)
>
> #EXTEM-CT vs PIVKA
> cor.test(epi$Prov2extemCT, epi$PIVKAMpostop, use="complete.obs",
method="pearson")

```

Pearson's product-moment correlation

```

data: epi$Prov2extemCT and epi$PIVKAMpostop
t = -0.9842, df = 29, p-value = 0.3332
alternative hypothesis: true correlation is not equal to 0
95 percent confidence interval:
 -0.5021355  0.1864331
sample estimates:
      cor
-0.1797837

```

```

> cor.test(epi$Prov2extemCT, epi$PIVKAMpostop, use="complete.obs",
method="spearman")

```

Spearman's rank correlation rho

```

data: epi$Prov2extemCT and epi$PIVKAMpostop
S = 7649.9, p-value = 0.001624
alternative hypothesis: true rho is not equal to 0
sample estimates:
      rho
-0.5423156

```

```

Warning message:
In cor.test.default(epi$Prov2extemCT, epi$PIVKAMpostop, use =
"complete.obs", :
  Cannot compute exact p-value with ties
> #RESULT:
> plot(epi$Prov2extemCT, epi$PIVKAMpostop, xlab="", ylab = "", cex.axis=2.7,
cex=2.5, pch=19, axes=F)
> axis(side=1,lwd=4,cex.axis=3, labels=NA)
> axis(side=1,lwd=0,cex.axis=3, line=1)
> axis(side=2,lwd=4,cex.axis=2, labels=NA)
> axis(side=2,lwd=0,cex.axis=2.5, line=0)
>
> #EXTEM-CT vs CRP
> cor.test(epi$Prov2extemCT, epi$Prov2rutinCRP, use="complete.obs",
method="pearson")

```

Pearson's product-moment correlation



```
data: epi$Prov2extemCT and epi$Prov2rutinCRP
t = 0.16566, df = 28, p-value = 0.8696
alternative hypothesis: true correlation is not equal to 0
95 percent confidence interval:
-0.3327281 0.3871963
sample estimates:
cor
0.03129213
```

```
> cor.test(epi$Prov2extemCT, epi$Prov2rutinCRP, use="complete.obs",
method="spearman")
```

Spearman's rank correlation rho

```
data: epi$Prov2extemCT and epi$Prov2rutinCRP
S = 4190.2, p-value = 0.7218
alternative hypothesis: true rho is not equal to 0
sample estimates:
rho
0.06780432
```

Warning message:

```
In cor.test.default(epi$Prov2extemCT, epi$Prov2rutinCRP, use =
"complete.obs", :
```

```
Cannot compute exact p-value with ties
```

```
> #RESULT:
```

```
> plot(epi$Prov2extemCT, epi$Prov2rutinCRP, xlab="", ylab = "", cex.axis=3,
cex=2.5, pch=19, axes=F)
```

```
> axis(side=1,lwd=4,cex.axis=3, labels=NA)
```

```
> axis(side=1,lwd=0,cex.axis=3, line=1)
```

```
> axis(side=2,lwd=4,cex.axis=3, labels=NA)
```

```
> axis(side=2,lwd=0,cex.axis=3, line=0)
```

```
>
```

```
>
```

```
>
```

```
> #FIBTEM-MCF vs PT-INR
```

```
> cor.test(epi$Prov2fibtemMCF, epi$Prov2rutinPK, use="complete.obs",
method="pearson")
```

Pearson's product-moment correlation

```
data: epi$Prov2fibtemMCF and epi$Prov2rutinPK
t = -0.99309, df = 31, p-value = 0.3284
alternative hypothesis: true correlation is not equal to 0
95 percent confidence interval:
-0.4893990 0.1784758
sample estimates:
cor
-0.1755922
```

```
> cor.test(epi$Prov2fibtemMCF, epi$Prov2rutinPK, use="complete.obs",
method="spearman")
```

Spearman's rank correlation rho

```
data: epi$Prov2fibtemMCF and epi$Prov2rutinPK
S = 6137.7, p-value = 0.8872
alternative hypothesis: true rho is not equal to 0
sample estimates:
      rho
-0.02568291
```

Warning message:

```
In cor.test.default(epi$Prov2fibtemMCF, epi$Prov2rutinPK, use =
"complete.obs", :
```

```
Cannot compute exact p-value with ties
```

```
> #RESULT:
```

```
> plot(epi$Prov2fibtemMCF, epi$Prov2rutinPK, xlab="", ylab = "", cex.axis=3,
cex=2.5, pch=19, axes=F)
```

```
> axis(side=1,lwd=4,cex.axis=3, labels=NA)
```

```
> axis(side=1,lwd=0,cex.axis=3, line=1)
```

```
> axis(side=2,lwd=4,cex.axis=3, labels=NA)
```

```
> axis(side=2,lwd=0,cex.axis=3, line=0)
```

```
>
```

```
> #fibtem-MCF vs aPTT
```

```
> cor.test(epi$Prov2fibtemMCF, epi$Prov2rutinAPTT, use="complete.obs",
method="pearson")
```

Pearson's product-moment correlation

```
data: epi$Prov2fibtemMCF and epi$Prov2rutinAPTT
t = -0.9046, df = 31, p-value = 0.3727
alternative hypothesis: true correlation is not equal to 0
95 percent confidence interval:
 -0.4773939  0.1935995
sample estimates:
      cor
-0.1603683
```

```
> cor.test(epi$Prov2fibtemMCF, epi$Prov2rutinAPTT, use="complete.obs",
method="spearman")
```

Spearman's rank correlation rho

```
data: epi$Prov2fibtemMCF and epi$Prov2rutinAPTT
S = 6003.7, p-value = 0.9855
alternative hypothesis: true rho is not equal to 0
sample estimates:
      rho
-0.003286168
```

Warning message:

```
In cor.test.default(epi$Prov2fibtemMCF, epi$Prov2rutinAPTT, use =
"complete.obs", :
```

```
Cannot compute exact p-value with ties
```

```
> #RESULT:
```

```
> plot(epi$Prov2fibtemMCF, epi$Prov2rutinAPTT, xlab="", ylab = "", cex.axis=3,
cex=2.5, pch=19, axes=F)
```

```
> axis(side=1,lwd=4,cex.axis=3, labels=NA)
```

```
> axis(side=1,lwd=0,cex.axis=3, line=1)
```

```
> axis(side=2,lwd=4,cex.axis=3, labels=NA)
```

```
> axis(side=2,lwd=0,cex.axis=3, line=0)
>
> #fibtem-MCF vs PIVKA
> cor.test(epi$Prov2fibtemMCF, epi$PIVKAMpostop, use="complete.obs",
method="pearson")
```

Pearson's product-moment correlation

```
data: epi$Prov2fibtemMCF and epi$PIVKAMpostop
t = -0.64842, df = 29, p-value = 0.5218
alternative hypothesis: true correlation is not equal to 0
95 percent confidence interval:
 -0.4546267  0.2451816
sample estimates:
      cor
-0.1195442
```

```
> cor.test(epi$Prov2fibtemMCF, epi$PIVKAMpostop, use="complete.obs",
method="spearman")
```

Spearman's rank correlation rho

```
data: epi$Prov2fibtemMCF and epi$PIVKAMpostop
S = 5548.7, p-value = 0.5248
alternative hypothesis: true rho is not equal to 0
sample estimates:
      rho
-0.1186822
```

Warning message:

```
In cor.test.default(epi$Prov2fibtemMCF, epi$PIVKAMpostop, use =
"complete.obs", :
```

```
Cannot compute exact p-value with ties
```

```
> #RESULT:
> plot(epi$Prov2fibtemMCF, epi$PIVKAMpostop, xlab="", ylab = "", cex.axis=3,
cex=2.5, pch=19, axes=F)
> axis(side=1,lwd=4,cex.axis=3, labels=NA)
> axis(side=1,lwd=0,cex.axis=3, line=1)
> axis(side=2,lwd=4,cex.axis=3, labels=NA)
> axis(side=2,lwd=0,cex.axis=3, line=0)
>
> #fibtem-MCF vs CRP
> cor.test(epi$Prov2fibtemMCF, epi$Prov2rutinCRP, use="complete.obs",
method="pearson")
```

Pearson's product-moment correlation

```
data: epi$Prov2fibtemMCF and epi$Prov2rutinCRP
t = -0.6738, df = 28, p-value = 0.506
alternative hypothesis: true correlation is not equal to 0
95 percent confidence interval:
 -0.4654053  0.2451080
sample estimates:
      cor
-0.1263155
```

```
> cor.test(epi$Prov2fibtemMCF, epi$Prov2rutinCRP, use="complete.obs",
method="spearman")
```

Spearman's rank correlation rho

```
data: epi$Prov2fibtemMCF and epi$Prov2rutinCRP
S = 4530.6, p-value = 0.9669
alternative hypothesis: true rho is not equal to 0
sample estimates:
      rho
-0.007921481
```

Warning message:

```
In cor.test.default(epi$Prov2fibtemMCF, epi$Prov2rutinCRP, use =
"complete.obs", :
```

```
Cannot compute exact p-value with ties
```

```
> #RESULT:
```

```
> plot(epi$Prov2fibtemMCF, epi$Prov2rutinCRP, xlab="", ylab = "", cex.axis=3,
cex=2.5, pch=19, axes=F)
```

```
> axis(side=1,lwd=4,cex.axis=3, labels=NA)
```

```
> axis(side=1,lwd=0,cex.axis=3, line=1)
```

```
> axis(side=2,lwd=4,cex.axis=3, labels=NA)
```

```
> axis(side=2,lwd=0,cex.axis=3, line=0)
```

```
>
```

```
>
```

```
>
```

```
> #F2 vs PT-INR
```

```
> cor.test(epi$F2postop, epi$Prov2rutinPK, use="complete.obs",
method="pearson")
```

Pearson's product-moment correlation

```
data: epi$F2postop and epi$Prov2rutinPK
t = -2.798, df = 29, p-value = 0.009041
alternative hypothesis: true correlation is not equal to 0
95 percent confidence interval:
 -0.7008942 -0.1275606
sample estimates:
      cor
-0.4610609
```

```
> cor.test(epi$F2postop, epi$Prov2rutinPK, use="complete.obs",
method="spearman")
```

Spearman's rank correlation rho

```
data: epi$F2postop and epi$Prov2rutinPK
S = 7595.9, p-value = 0.002095
alternative hypothesis: true rho is not equal to 0
sample estimates:
      rho
-0.5314268
```

Warning message:

```
In cor.test.default(epi$F2postop, epi$Prov2rutinPK, use = "complete.obs", :
Cannot compute exact p-value with ties
```

```

> #RESULT:
> plot(epi$F2postop, epi$Prov2rutinPK, xlab="", ylab = "", cex.axis=3, cex=2.5,
pch=19, axes=F,abline(lm(epi$Prov2rutinPK~ epi$F2postop),lwd=3))
> axis(side=1,lwd=4,cex.axis=3, labels=NA)
> axis(side=1,lwd=0,cex.axis=3, line=1)
> axis(side=2,lwd=4,cex.axis=3, labels=NA)
> axis(side=2,lwd=0,cex.axis=3, line=0)
> text(1.4,1.5,"r=-0.53**",cex=7)
>
> #F2 vs aPTT
> cor.test(epi$F2postop, epi$Prov2rutinAPTT, use="complete.obs",
method="pearson")

```

Pearson's product-moment correlation

```

data: epi$F2postop and epi$Prov2rutinAPTT
t = -2.8248, df = 29, p-value = 0.008471
alternative hypothesis: true correlation is not equal to 0
95 percent confidence interval:
 -0.7031311 -0.1318968
sample estimates:
      cor
-0.4645266

```

```

> cor.test(epi$F2postop, epi$Prov2rutinAPTT, use="complete.obs",
method="spearman")

```

Spearman's rank correlation rho

```

data: epi$F2postop and epi$Prov2rutinAPTT
S = 6623.8, p-value = 0.06508
alternative hypothesis: true rho is not equal to 0
sample estimates:
      rho
-0.3354347

```

Warning message:

```

In cor.test.default(epi$F2postop, epi$Prov2rutinAPTT, use = "complete.obs", :
  Cannot compute exact p-value with ties

```

```

> #RESULT:
> plot(epi$F2postop, epi$Prov2rutinAPTT, xlab="", ylab = "", cex.axis=3,
cex=2.5, pch=19, axes=F,abline(lm(epi$Prov2rutinAPTT~ epi
$F2postop),lwd=3,lty=2))
> axis(side=1,lwd=4,cex.axis=3, labels=NA)
> axis(side=1,lwd=0,cex.axis=3, line=1)
> axis(side=2,lwd=4,cex.axis=3, labels=NA)
> axis(side=2,lwd=0,cex.axis=3, line=0)
> text(1.35,40,"r=-0.46*",cex=8)
>
> #F2 vs PIVKA
> cor.test(epi$F2postop, epi$PIVKAMpostop, use="complete.obs",
method="pearson")

```

Pearson's product-moment correlation

```

data: epi$F2postop and epi$PIVKAMpostop

```

```
t = 0.62829, df = 29, p-value = 0.5347
alternative hypothesis: true correlation is not equal to 0
95 percent confidence interval:
 -0.2486658  0.4516782
sample estimates:
      cor
0.1158852
```

```
> cor.test(epi$F2postop, epi$PIVKAMpostop, use="complete.obs",
method="spearman")
```

Spearman's rank correlation rho

```
data: epi$F2postop and epi$PIVKAMpostop
S = 3200, p-value = 0.05082
alternative hypothesis: true rho is not equal to 0
sample estimates:
      rho
0.3548387
```

```
> #RESULT:
> plot(epi$F2postop, epi$PIVKAMpostop, xlab="", ylab = "", cex.axis=3, cex=2.5,
pch=19, axes=F)
> axis(side=1,lwd=4,cex.axis=3, labels=NA)
> axis(side=1,lwd=0,cex.axis=3, line=1)
> axis(side=2,lwd=4,cex.axis=3, labels=NA)
> axis(side=2,lwd=0,cex.axis=3, line=0)
>
> #F2 vs CRP
> cor.test(epi$F2postop, epi$Prov2rutiCRP, use="complete.obs",
method="pearson")
```

Pearson's product-moment correlation

```
data: epi$F2postop and epi$Prov2rutiCRP
t = -0.77348, df = 26, p-value = 0.4462
alternative hypothesis: true correlation is not equal to 0
95 percent confidence interval:
 -0.4953380  0.2363232
sample estimates:
      cor
-0.1499767
```

```
> cor.test(epi$F2postop, epi$Prov2rutiCRP, use="complete.obs",
method="spearman")
```

Spearman's rank correlation rho

```
data: epi$F2postop and epi$Prov2rutiCRP
S = 4133.1, p-value = 0.506
alternative hypothesis: true rho is not equal to 0
sample estimates:
      rho
-0.1311251
```

Warning message:

```
In cor.test.default(epi$F2postop, epi$Prov2rutinCRP, use = "complete.obs", :  
  Cannot compute exact p-value with ties
```

```
> #RESULT:  
> plot(epi$F2postop, epi$Prov2rutinCRP, xlab="", ylab = "", cex.axis=3,  
cex=2.5, pch=19, axes=F)  
> axis(side=1,lwd=4,cex.axis=3, labels=NA)  
> axis(side=1,lwd=0,cex.axis=3, line=1)  
> axis(side=2,lwd=4,cex.axis=3, labels=NA)  
> axis(side=2,lwd=0,cex.axis=3, line=0)  
>  
>  
>  
> #F7 vs PT-INR  
> cor.test(epi$F7postop, epi$Prov2rutinPK, use="complete.obs",  
method="pearson")
```

Pearson's product-moment correlation

```
data: epi$F7postop and epi$Prov2rutinPK  
t = -3.7201, df = 29, p-value = 0.0008505  
alternative hypothesis: true correlation is not equal to 0  
95 percent confidence interval:  
 -0.7680348 -0.2680127  
sample estimates:  
      cor  
-0.5683756
```

```
> cor.test(epi$F7postop, epi$Prov2rutinPK, use="complete.obs",  
method="spearman")
```

Spearman's rank correlation rho

```
data: epi$F7postop and epi$Prov2rutinPK  
S = 7645.4, p-value = 0.001659  
alternative hypothesis: true rho is not equal to 0  
sample estimates:  
      rho  
-0.5414184
```

Warning message:

```
In cor.test.default(epi$F7postop, epi$Prov2rutinPK, use = "complete.obs", :  
  Cannot compute exact p-value with ties
```

```
> #RESULT:  
> plot(epi$F7postop, epi$Prov2rutinPK, xlab="", ylab = "", cex.axis=3, cex=2.5,  
pch=19, axes=F,abline(lm(epi$Prov2rutinPK~ epi$F7postop),lwd=3))  
> axis(side=1,lwd=4,cex.axis=3, labels=NA)  
> axis(side=1,lwd=0,cex.axis=3, line=1)  
> axis(side=2,lwd=4,cex.axis=3, labels=NA)  
> axis(side=2,lwd=0,cex.axis=3, line=0)  
> text(1.2,1.5,"r=-0.57**",cex=6)  
>  
> #F7 vs aPTT  
> cor.test(epi$F7postop, epi$Prov2rutinAPTT, use="complete.obs",  
method="pearson")
```

Pearson's product-moment correlation

```
data: epi$F7postop and epi$Prov2rutinAPTT
t = -1.8185, df = 29, p-value = 0.07934
alternative hypothesis: true correlation is not equal to 0
95 percent confidence interval:
 -0.60561656  0.03880751
sample estimates:
      cor
-0.319932
```

```
> cor.test(epi$F7postop, epi$Prov2rutinAPTT, use="complete.obs",
method="spearman")
```

Spearman's rank correlation rho

```
data: epi$F7postop and epi$Prov2rutinAPTT
S = 5981, p-value = 0.2666
alternative hypothesis: true rho is not equal to 0
sample estimates:
      rho
-0.2058442
```

Warning message:

```
In cor.test.default(epi$F7postop, epi$Prov2rutinAPTT, use = "complete.obs", :
  Cannot compute exact p-value with ties
```

```
> #RESULT:
> plot(epi$F7postop, epi$Prov2rutinAPTT, xlab="", ylab = "", cex.axis=3,
cex=2.5, pch=19, axes=F)
> axis(side=1,lwd=4,cex.axis=3, labels=NA)
> axis(side=1,lwd=0,cex.axis=3, line=1)
> axis(side=2,lwd=4,cex.axis=3, labels=NA)
> axis(side=2,lwd=0,cex.axis=3, line=0)
>
>
> #F7 vs PIVKA
> cor.test(epi$F7postop, epi$PIVKAMpostop, use="complete.obs",
method="pearson")
```

Pearson's product-moment correlation

```
data: epi$F7postop and epi$PIVKAMpostop
t = 1.2953, df = 29, p-value = 0.2054
alternative hypothesis: true correlation is not equal to 0
95 percent confidence interval:
 -0.1313587  0.5431934
sample estimates:
      cor
0.2338669
```

```
> cor.test(epi$F7postop, epi$PIVKAMpostop, use="complete.obs",
method="spearman")
```

Spearman's rank correlation rho

```
data: epi$F7postop and epi$PIVKAMpostop
S = 3364, p-value = 0.07795
```



```
alternative hypothesis: true rho is not equal to 0
sample estimates:
      rho
0.3217742
```

```
> #RESULT:
> plot(epi$F7postop, epi$PIVKAMpostop, xlab="", ylab = "", cex.axis=3, cex=2.5,
pch=19, axes=F)
> axis(side=1,lwd=4,cex.axis=3, labels=NA)
> axis(side=1,lwd=0,cex.axis=3, line=1)
> axis(side=2,lwd=4,cex.axis=3, labels=NA)
> axis(side=2,lwd=0,cex.axis=3, line=0)
>
> #F7 vs CRP
> cor.test(epi$F7postop, epi$Prov2rutinCRP, use="complete.obs",
method="pearson")
```

Pearson's product-moment correlation

```
data: epi$F7postop and epi$Prov2rutinCRP
t = -0.27418, df = 26, p-value = 0.7861
alternative hypothesis: true correlation is not equal to 0
95 percent confidence interval:
 -0.4183889  0.3259125
sample estimates:
      cor
-0.05369296
```

```
> cor.test(epi$F7postop, epi$Prov2rutinCRP, use="complete.obs",
method="spearman")
```

Spearman's rank correlation rho

```
data: epi$F7postop and epi$Prov2rutinCRP
S = 4240.2, p-value = 0.4148
alternative hypothesis: true rho is not equal to 0
sample estimates:
      rho
-0.1604161
```

Warning message:

```
In cor.test.default(epi$F7postop, epi$Prov2rutinCRP, use = "complete.obs", :
  Cannot compute exact p-value with ties
```

```
> #RESULT:
> plot(epi$F7postop, epi$Prov2rutinCRP, xlab="", ylab = "", cex.axis=3,
cex=2.5, pch=19, axes=F)
> axis(side=1,lwd=4,cex.axis=3, labels=NA)
> axis(side=1,lwd=0,cex.axis=3, line=1)
> axis(side=2,lwd=4,cex.axis=3, labels=NA)
> axis(side=2,lwd=0,cex.axis=3, line=0)
>
>
>
> #F9 vs PT-INR
> cor.test(epi$F9postop, epi$Prov2rutinPK, use="complete.obs",
method="pearson")
```

Pearson's product-moment correlation

```
data: epi$F9postop and epi$Prov2rutinPK
t = -2.046, df = 29, p-value = 0.04992
alternative hypothesis: true correlation is not equal to 0
95 percent confidence interval:
 -0.6301952979 -0.0009432787
sample estimates:
      cor
-0.3551647
```

```
> cor.test(epi$F9postop, epi$Prov2rutinPK, use="complete.obs",
method="spearman")
```

Spearman's rank correlation rho

```
data: epi$F9postop and epi$Prov2rutinPK
S = 6244.4, p-value = 0.1595
alternative hypothesis: true rho is not equal to 0
sample estimates:
      rho
-0.2589483
```

Warning message:

```
In cor.test.default(epi$F9postop, epi$Prov2rutinPK, use = "complete.obs", :
  Cannot compute exact p-value with ties
```

```
> #RESULT:
> plot(epi$F9postop, epi$Prov2rutinPK, xlab="", ylab = "", cex.axis=3, cex=2.5,
pch=19, axes=F,abline(lm(epi$Prov2rutinPK~ epi$F9postop),lwd=3,lty=2))
> axis(side=1,lwd=4,cex.axis=3, labels=NA)
> axis(side=1,lwd=0,cex.axis=3, line=1)
> axis(side=2,lwd=4,cex.axis=3, labels=NA)
> axis(side=2,lwd=0,cex.axis=3, line=0)
> text(1.95,1.55,"r=-0.36*",cex=7)
>
> #F9 vs aPTT
> cor.test(epi$F9postop, epi$Prov2rutinAPTT, use="complete.obs",
method="pearson")
```

Pearson's product-moment correlation

```
data: epi$F9postop and epi$Prov2rutinAPTT
t = -1.2637, df = 29, p-value = 0.2164
alternative hypothesis: true correlation is not equal to 0
95 percent confidence interval:
 -0.5391469 0.1369781
sample estimates:
      cor
-0.2284503
```

```
> cor.test(epi$F9postop, epi$Prov2rutinAPTT, use="complete.obs",
method="spearman")
```

Spearman's rank correlation rho

```
data: epi$F9postop and epi$Prov2rutinAPTT
S = 5896.5, p-value = 0.309
alternative hypothesis: true rho is not equal to 0
sample estimates:
      rho
-0.1888088
```

Warning message:

```
In cor.test.default(epi$F9postop, epi$Prov2rutinAPTT, use = "complete.obs", :
  Cannot compute exact p-value with ties
```

```
> #RESULT:
> plot(epi$F9postop, epi$Prov2rutinAPTT, xlab="", ylab = "", cex.axis=3,
cex=2.5, pch=19, axes=F)
> axis(side=1,lwd=4,cex.axis=3, labels=NA)
> axis(side=1,lwd=0,cex.axis=3, line=1)
> axis(side=2,lwd=4,cex.axis=3, labels=NA)
> axis(side=2,lwd=0,cex.axis=3, line=0)
>
>
> #F9 vs PIVKA
> cor.test(epi$F9postop, epi$PIVKAMpostop, use="complete.obs",
method="pearson")
```

Pearson's product-moment correlation

```
data: epi$F9postop and epi$PIVKAMpostop
t = 0.23775, df = 29, p-value = 0.8137
alternative hypothesis: true correlation is not equal to 0
95 percent confidence interval:
 -0.3151594  0.3923150
sample estimates:
      cor
0.04410625
```

```
> cor.test(epi$F9postop, epi$PIVKAMpostop, use="complete.obs",
method="spearman")
```

Spearman's rank correlation rho

```
data: epi$F9postop and epi$PIVKAMpostop
S = 5260, p-value = 0.7459
alternative hypothesis: true rho is not equal to 0
sample estimates:
      rho
-0.06048387
```

```
> #RESULT:
> plot(epi$F9postop, epi$PIVKAMpostop, xlab="", ylab = "", cex.axis=3, cex=2.5,
pch=19, axes=F)
> axis(side=1,lwd=4,cex.axis=3, labels=NA)
> axis(side=1,lwd=0,cex.axis=3, line=1)
> axis(side=2,lwd=4,cex.axis=3, labels=NA)
> axis(side=2,lwd=0,cex.axis=3, line=0)
>
>
> #F9 vs CRP
> cor.test(epi$F9postop, epi$Prov2rutinCRP, use="complete.obs",
```

```
method="pearson")
```

Pearson's product-moment correlation

```
data: epi$F9postop and epi$Prov2rutinCRP
t = 1.0772, df = 26, p-value = 0.2913
alternative hypothesis: true correlation is not equal to 0
95 percent confidence interval:
 -0.1802788  0.5382686
sample estimates:
      cor
0.2067003
```

```
> cor.test(epi$F9postop, epi$Prov2rutinCRP, use="complete.obs",
method="spearman")
```

Spearman's rank correlation rho

```
data: epi$F9postop and epi$Prov2rutinCRP
S = 2792.8, p-value = 0.2273
alternative hypothesis: true rho is not equal to 0
sample estimates:
      rho
0.2356967
```

Warning message:

```
In cor.test.default(epi$F9postop, epi$Prov2rutinCRP, use = "complete.obs", :
  Cannot compute exact p-value with ties
```

```
> #RESULT:
```

```
> plot(epi$F9postop, epi$Prov2rutinCRP, xlab="", ylab = "", cex.axis=3,
cex=2.5, pch=19, axes=F)
```

```
> axis(side=1,lwd=4,cex.axis=3, labels=NA)
```

```
> axis(side=1,lwd=0,cex.axis=3, line=1)
```

```
> axis(side=2,lwd=4,cex.axis=3, labels=NA)
```

```
> axis(side=2,lwd=0,cex.axis=3, line=0)
```

```
>
```

```
>
```

```
> #F10 vs PT-INR
```

```
> cor.test(epi$F10postop, epi$Prov2rutinPK, use="complete.obs",
method="pearson")
```

Pearson's product-moment correlation

```
data: epi$F10postop and epi$Prov2rutinPK
t = -2.4963, df = 29, p-value = 0.01848
alternative hypothesis: true correlation is not equal to 0
95 percent confidence interval:
 -0.67440010 -0.07781606
sample estimates:
      cor
-0.4205599
```

```
> cor.test(epi$F10postop, epi$Prov2rutinPK, use="complete.obs",
method="spearman")
```

Spearman's rank correlation rho

```
data: epi$F10postop and epi$Prov2rutinPK
S = 6921.9, p-value = 0.02763
alternative hypothesis: true rho is not equal to 0
sample estimates:
      rho
-0.3955396
```

Warning message:

```
In cor.test.default(epi$F10postop, epi$Prov2rutinPK, use = "complete.obs", :
  Cannot compute exact p-value with ties
```

```
> #RESULT:
> plot(epi$F10postop, epi$Prov2rutinPK, xlab="", ylab = "", cex.axis=3,
cex=2.5, pch=19, axes=F,abline(lm(epi$Prov2rutinPK~ epi
$F10postop),lwd=3,lty=1))
> axis(side=1,lwd=4,cex.axis=3, labels=NA)
> axis(side=1,lwd=0,cex.axis=3, line=1)
> axis(side=2,lwd=4,cex.axis=3, labels=NA)
> axis(side=2,lwd=0,cex.axis=3, line=0)
> text(1.2,1.55,"r=-0.40*",cex=7)
>
> #F10 vs aPTT
> cor.test(epi$F10postop, epi$Prov2rutinAPTT, use="complete.obs",
method="pearson")
```

Pearson's product-moment correlation

```
data: epi$F10postop and epi$Prov2rutinAPTT
t = -2.9444, df = 29, p-value = 0.006314
alternative hypothesis: true correlation is not equal to 0
95 percent confidence interval:
 -0.7128916 -0.1510770
sample estimates:
      cor
-0.4797356
```

```
> cor.test(epi$F10postop, epi$Prov2rutinAPTT, use="complete.obs",
method="spearman")
```

Spearman's rank correlation rho

```
data: epi$F10postop and epi$Prov2rutinAPTT
S = 7046.9, p-value = 0.01842
alternative hypothesis: true rho is not equal to 0
sample estimates:
      rho
-0.4207554
```

Warning message:

```
In cor.test.default(epi$F10postop, epi$Prov2rutinAPTT, use = "complete.obs", :
  Cannot compute exact p-value with ties
```

```
> #RESULT:
> plot(epi$F10postop, epi$Prov2rutinAPTT, xlab="", ylab = "", cex.axis=3,
cex=2.5, pch=19, axes=F,abline(lm(epi$Prov2rutinAPTT~ epi
$F10postop),lwd=3,lty=1))
> axis(side=1,lwd=4,cex.axis=3, labels=NA)
```

```

> axis(side=1,lwd=0,cex.axis=3, line=1)
> axis(side=2,lwd=4,cex.axis=3, labels=NA)
> axis(side=2,lwd=0,cex.axis=3, line=0)
> text(1.2,40,"r=-0.48*",cex=7)
>
> #F10 vs PIVKA
> cor.test(eps$F10postop, eps$PIVKAMpostop, use="complete.obs",
method="pearson")

```

Pearson's product-moment correlation

```

data: eps$F10postop and eps$PIVKAMpostop
t = 0.72038, df = 29, p-value = 0.4771
alternative hypothesis: true correlation is not equal to 0
95 percent confidence interval:
 -0.2326811  0.4650804
sample estimates:
      cor
0.1325909

```

```

> cor.test(eps$F10postop, eps$PIVKAMpostop, use="complete.obs",
method="spearman")

```

Spearman's rank correlation rho

```

data: eps$F10postop and eps$PIVKAMpostop
S = 4747, p-value = 0.8186
alternative hypothesis: true rho is not equal to 0
sample estimates:
      rho
0.04294788

```

Warning message:

```

In cor.test.default(eps$F10postop, eps$PIVKAMpostop, use = "complete.obs", :
  Cannot compute exact p-value with ties

```

```

> #RESULT:
> plot(eps$F10postop, eps$PIVKAMpostop, xlab="", ylab = "", cex.axis=3,
cex=2.5, pch=19, axes=F)
> axis(side=1,lwd=4,cex.axis=3, labels=NA)
> axis(side=1,lwd=0,cex.axis=3, line=1)
> axis(side=2,lwd=4,cex.axis=3, labels=NA)
> axis(side=2,lwd=0,cex.axis=3, line=0)
>
> #F10 vs CRP
> cor.test(eps$F10postop, eps$Prov2rutinCRP, use="complete.obs",
method="pearson")

```

Pearson's product-moment correlation

```

data: eps$F10postop and eps$Prov2rutinCRP
t = 0.39461, df = 26, p-value = 0.6963
alternative hypothesis: true correlation is not equal to 0
95 percent confidence interval:
 -0.3046882  0.4376384
sample estimates:
      cor

```

0.07715958

```
> cor.test(epi$F10postop, epi$Prov2rutinCRP, use="complete.obs",  
method="spearman")
```

Spearman's rank correlation rho

```
data: epi$F10postop and epi$Prov2rutinCRP  
S = 3224.9, p-value = 0.5517  
alternative hypothesis: true rho is not equal to 0  
sample estimates:  
rho  
0.1174377
```

Warning message:

```
In cor.test.default(epi$F10postop, epi$Prov2rutinCRP, use = "complete.obs", :  
Cannot compute exact p-value with ties
```

```
> #RESULT:
```

```
> plot(epi$F10postop, epi$Prov2rutinCRP, xlab="", ylab = "", cex.axis=3,  
cex=2.5, pch=19, axes=F)
```

```
> axis(side=1,lwd=4,cex.axis=3, labels=NA)
```

```
> axis(side=1,lwd=0,cex.axis=3, line=1)
```

```
> axis(side=2,lwd=4,cex.axis=3, labels=NA)
```

```
> axis(side=2,lwd=0,cex.axis=3, line=0)
```

```
>
```

```
>
```

```
> #F11 vs PT-INR
```

```
> cor.test(epi$F11postop, epi$Prov2rutinPK, use="complete.obs",  
method="pearson")
```

Pearson's product-moment correlation

```
data: epi$F11postop and epi$Prov2rutinPK  
t = -2.7558, df = 29, p-value = 0.01001  
alternative hypothesis: true correlation is not equal to 0  
95 percent confidence interval:  
-0.6973286 -0.1206935  
sample estimates:  
cor  
-0.4555513
```

```
> cor.test(epi$F11postop, epi$Prov2rutinPK, use="complete.obs",  
method="spearman")
```

Spearman's rank correlation rho

```
data: epi$F11postop and epi$Prov2rutinPK  
S = 6819.1, p-value = 0.03775  
alternative hypothesis: true rho is not equal to 0  
sample estimates:  
rho  
-0.3748259
```

Warning message:

```
In cor.test.default(epi$F11postop, epi$Prov2rutinPK, use = "complete.obs", :  
Cannot compute exact p-value with ties
```

```

> #RESULT:
> plot(epi$F11postop, epi$Prov2rutinPK, xlab="", ylab = "", cex.axis=3,
cex=2.5, pch=19, axes=F,abline(lm(epi$Prov2rutinPK~ epi
$F11postop),lwd=3,lty=1))
> axis(side=1,lwd=4,cex.axis=3, labels=NA)
> axis(side=1,lwd=0,cex.axis=3, line=1)
> axis(side=2,lwd=4,cex.axis=3, labels=NA)
> axis(side=2,lwd=0,cex.axis=3, line=0)
> text(1.35,1.55,"r=-0.45*",cex=7)
>
> #F11 vs aPTT
> cor.test(epi$F11postop, epi$Prov2rutinAPTT, use="complete.obs",
method="pearson")

```

Pearson's product-moment correlation

```

data: epi$F11postop and epi$Prov2rutinAPTT
t = -3.7572, df = 29, p-value = 0.0007701
alternative hypothesis: true correlation is not equal to 0
95 percent confidence interval:
 -0.7703469 -0.2732601
sample estimates:
      cor
-0.5721961

```

```

> cor.test(epi$F11postop, epi$Prov2rutinAPTT, use="complete.obs",
method="spearman")

```

Spearman's rank correlation rho

```

data: epi$F11postop and epi$Prov2rutinAPTT
S = 7650.5, p-value = 0.001618
alternative hypothesis: true rho is not equal to 0
sample estimates:
      rho
-0.542449

```

Warning message:

```

In cor.test.default(epi$F11postop, epi$Prov2rutinAPTT, use = "complete.obs", :
  Cannot compute exact p-value with ties

```

```

> #RESULT:
> plot(epi$F11postop, epi$Prov2rutinAPTT, xlab="", ylab = "", cex.axis=3,
cex=2.5, pch=19, axes=F,abline(lm(epi$Prov2rutinAPTT~ epi
$F11postop),lwd=3,lty=1))
> axis(side=1,lwd=4,cex.axis=3, labels=NA)
> axis(side=1,lwd=0,cex.axis=3, line=1)
> axis(side=2,lwd=4,cex.axis=3, labels=NA)
> axis(side=2,lwd=0,cex.axis=3, line=0)
> text(1.2,40,"r=-0.48*",cex=7)
>
> #F11 vs PIVKA
> cor.test(epi$F11postop, epi$PIVKAMpostop, use="complete.obs",
method="pearson")

```

Pearson's product-moment correlation



```
data: epi$F11postop and epi$PIVKAMpostop
t = 1.344, df = 29, p-value = 0.1894
alternative hypothesis: true correlation is not equal to 0
95 percent confidence interval:
 -0.1227165  0.5493561
sample estimates:
      cor
0.2421533
```

```
> cor.test(epi$F11postop, epi$PIVKAMpostop, use="complete.obs",
method="spearman")
```

Spearman's rank correlation rho

```
data: epi$F11postop and epi$PIVKAMpostop
S = 3231.8, p-value = 0.05475
alternative hypothesis: true rho is not equal to 0
sample estimates:
      rho
0.3484222
```

Warning message:

```
In cor.test.default(epi$F11postop, epi$PIVKAMpostop, use = "complete.obs", :
  Cannot compute exact p-value with ties
```

```
> #RESULT:
```

```
> plot(epi$F11postop, epi$PIVKAMpostop, xlab="", ylab = "", cex.axis=3,
cex=2.5, pch=19, axes=F)
```

```
> axis(side=1,lwd=4,cex.axis=3, labels=NA)
```

```
> axis(side=1,lwd=0,cex.axis=3, line=1)
```

```
> axis(side=2,lwd=4,cex.axis=3, labels=NA)
```

```
> axis(side=2,lwd=0,cex.axis=3, line=0)
```

```
>
```

```
> #F11 vs CRP
```

```
> cor.test(epi$F11postop, epi$Prov2rutinCRP, use="complete.obs",
method="pearson")
```

Pearson's product-moment correlation

```
data: epi$F11postop and epi$Prov2rutinCRP
t = -1.3216, df = 26, p-value = 0.1978
alternative hypothesis: true correlation is not equal to 0
95 percent confidence interval:
 -0.5705603  0.1348068
sample estimates:
      cor
-0.2508881
```

```
> cor.test(epi$F11postop, epi$Prov2rutinCRP, use="complete.obs",
method="spearman")
```

Spearman's rank correlation rho

```
data: epi$F11postop and epi$Prov2rutinCRP
S = 4382.3, p-value = 0.3092
alternative hypothesis: true rho is not equal to 0
sample estimates:
```

```
rho
-0.1993155
```

Warning message:

```
In cor.test.default(epi$F11postop, epi$Prov2rutinCRP, use = "complete.obs", :
  Cannot compute exact p-value with ties
```

```
> #RESULT:
> plot(epi$F11postop, epi$Prov2rutinCRP, xlab="", ylab = "", cex.axis=3,
cex=2.5, pch=19, axes=F)
> axis(side=1,lwd=4,cex.axis=3, labels=NA)
> axis(side=1,lwd=0,cex.axis=3, line=1)
> axis(side=2,lwd=4,cex.axis=3, labels=NA)
> axis(side=2,lwd=0,cex.axis=3, line=0)
>
>
>
> #F12 vs PT-INR
> cor.test(epi$F12postop, epi$Prov2rutinPK, use="complete.obs",
method="pearson")
```

Pearson's product-moment correlation

```
data: epi$F12postop and epi$Prov2rutinPK
t = -1.9473, df = 29, p-value = 0.06124
alternative hypothesis: true correlation is not equal to 0
95 percent confidence interval:
 -0.61972276  0.01624047
sample estimates:
      cor
-0.3400566
```

```
> cor.test(epi$F12postop, epi$Prov2rutinPK, use="complete.obs",
method="spearman")
```

Spearman's rank correlation rho

```
data: epi$F12postop and epi$Prov2rutinPK
S = 6396.2, p-value = 0.1141
alternative hypothesis: true rho is not equal to 0
sample estimates:
      rho
-0.2895475
```

Warning message:

```
In cor.test.default(epi$F12postop, epi$Prov2rutinPK, use = "complete.obs", :
  Cannot compute exact p-value with ties
```

```
> #RESULT:
> plot(epi$F12postop, epi$Prov2rutinPK, xlab="", ylab = "", cex.axis=3,
cex=2.5, pch=19, axes=F)
> axis(side=1,lwd=4,cex.axis=3, labels=NA)
> axis(side=1,lwd=0,cex.axis=3, line=1)
> axis(side=2,lwd=4,cex.axis=3, labels=NA)
> axis(side=2,lwd=0,cex.axis=3, line=0)
>
>
>
> #F12 vs aPTT
```

```
> cor.test(epi$F12postop, epi$Prov2rutinAPTT, use="complete.obs",
method="pearson")
```

Pearson's product-moment correlation

```
data: epi$F12postop and epi$Prov2rutinAPTT
t = -3.2114, df = 29, p-value = 0.003223
alternative hypothesis: true correlation is not equal to 0
95 percent confidence interval:
 -0.7334190 -0.1928443
sample estimates:
      cor
-0.5121855
```

```
> cor.test(epi$F12postop, epi$Prov2rutinAPTT, use="complete.obs",
method="spearman")
```

Spearman's rank correlation rho

```
data: epi$F12postop and epi$Prov2rutinAPTT
S = 7614.6, p-value = 0.00192
alternative hypothesis: true rho is not equal to 0
sample estimates:
      rho
-0.5351948
```

Warning message:

```
In cor.test.default(epi$F12postop, epi$Prov2rutinAPTT, use = "complete.obs", :
  Cannot compute exact p-value with ties
```

```
> #RESULT:
> plot(epi$F12postop, epi$Prov2rutinAPTT, xlab="", ylab = "", cex.axis=3,
cex=2.5, pch=19, axes=F,abline(lm(epi$Prov2rutinAPTT~ epi
$F12postop),lwd=3,lty=1))
> axis(side=1,lwd=4,cex.axis=3, labels=NA)
> axis(side=1,lwd=0,cex.axis=3, line=1)
> axis(side=2,lwd=4,cex.axis=3, labels=NA)
> axis(side=2,lwd=0,cex.axis=3, line=0)
> text(1.1,40,"r=-0.51**",cex=7)
>
> #F12 vs PIVKA
> cor.test(epi$F12postop, epi$PIVKAMpostop, use="complete.obs",
method="pearson")
```

Pearson's product-moment correlation

```
data: epi$F12postop and epi$PIVKAMpostop
t = 2.0018, df = 29, p-value = 0.05474
alternative hypothesis: true correlation is not equal to 0
95 percent confidence interval:
 -0.006736402 0.625543087
sample estimates:
      cor
0.3484354
```

```
> cor.test(epi$F12postop, epi$PIVKAMpostop, use="complete.obs",
method="spearman")
```

Spearman's rank correlation rho

```
data: epi$F12postop and epi$PIVKAMpostop
S = 1978, p-value = 0.0004509
alternative hypothesis: true rho is not equal to 0
sample estimates:
      rho
0.6012097
```

```
> #RESULT:
> plot(epi$F12postop, epi$PIVKAMpostop, xlab="", ylab = "", cex.axis=3,
cex=2.5, pch=19, axes=F,ylim=c(0,110),abline(lm(epi$PIVKAMpostop~epi
$F12postop),lwd=3,lty=2))
> axis(side=1,lwd=4,cex.axis=3, labels=NA)
> axis(side=1,lwd=0,cex.axis=3, line=1)
> axis(side=2,lwd=4,cex.axis=3, labels=NA)
> axis(side=2,lwd=0,cex.axis=3, line=0)
> text(.95,90,"Rho=0.60**",cex=6)
>
> #F12 vs CRP
> cor.test(epi$F12postop, epi$Prov2rutinCRP, use="complete.obs",
method="pearson")
```

Pearson's product-moment correlation

```
data: epi$F12postop and epi$Prov2rutinCRP
t = -3.4561, df = 26, p-value = 0.001896
alternative hypothesis: true correlation is not equal to 0
95 percent confidence interval:
 -0.7724510 -0.2377528
sample estimates:
      cor
-0.5610634
```

```
> cor.test(epi$F12postop, epi$Prov2rutinCRP, use="complete.obs",
method="spearman")
```

Spearman's rank correlation rho

```
data: epi$F12postop and epi$Prov2rutinCRP
S = 5854.6, p-value = 0.0006964
alternative hypothesis: true rho is not equal to 0
sample estimates:
      rho
-0.6022448
```

Warning message:

```
In cor.test.default(epi$F12postop, epi$Prov2rutinCRP, use = "complete.obs", :
  Cannot compute exact p-value with ties
```

```
> #RESULT:
> plot(epi$F12postop, epi$Prov2rutinCRP, xlab="", ylab = "", cex.axis=3,
cex=2.5, pch=19, axes=F,abline(lm(epi$Prov2rutinCRP~ epi
$F12postop),lwd=3,lty=1))
> axis(side=1,lwd=4,cex.axis=3, labels=NA)
> axis(side=1,lwd=0,cex.axis=3, line=1)
```

```

> axis(side=2,lwd=4,cex.axis=3, labels=NA)
> axis(side=2,lwd=0,cex.axis=3, line=0)
> text(.95,250,"r=-0.56**",cex=6)
>
>
>
>
> #F13 vs PT-INR
> cor.test(epi$F13postop, epi$Prov2rutinPK, use="complete.obs",
method="pearson")

```

Pearson's product-moment correlation

```

data: epi$F13postop and epi$Prov2rutinPK
t = -2.035, df = 29, p-value = 0.05109
alternative hypothesis: true correlation is not equal to 0
95 percent confidence interval:
 -0.6290361706  0.0009771294
sample estimates:
      cor
-0.3534854

```

```

> cor.test(epi$F13postop, epi$Prov2rutinPK, use="complete.obs",
method="spearman")

```

Spearman's rank correlation rho

```

data: epi$F13postop and epi$Prov2rutinPK
S = 6076.1, p-value = 0.2236
alternative hypothesis: true rho is not equal to 0
sample estimates:
      rho
-0.2250186

```

Warning message:

```

In cor.test.default(epi$F13postop, epi$Prov2rutinPK, use = "complete.obs", :
  Cannot compute exact p-value with ties

```

```

> #RESULT:
> plot(epi$F13postop, epi$Prov2rutinPK, xlab="", ylab = "", cex.axis=3,
cex=2.5, pch=19, axes=F)
> axis(side=1,lwd=4,cex.axis=3, labels=NA)
> axis(side=1,lwd=0,cex.axis=3, line=1)
> axis(side=2,lwd=4,cex.axis=3, labels=NA)
> axis(side=2,lwd=0,cex.axis=3, line=0)
>
>
> #F13 vs aPTT
> cor.test(epi$F13postop, epi$Prov2rutinAPTT, use="complete.obs",
method="pearson")

```

Pearson's product-moment correlation

```

data: epi$F13postop and epi$Prov2rutinAPTT
t = -1.1949, df = 29, p-value = 0.2418
alternative hypothesis: true correlation is not equal to 0
95 percent confidence interval:

```

```
-0.5302610 0.1491672
sample estimates:
      cor
-0.2166227
```

```
> cor.test(epi$F13postop, epi$Prov2rutinAPTT, use="complete.obs",
method="spearman")
```

Spearman's rank correlation rho

```
data: epi$F13postop and epi$Prov2rutinAPTT
S = 5905.5, p-value = 0.3043
alternative hypothesis: true rho is not equal to 0
sample estimates:
      rho
-0.190634
```

Warning message:

```
In cor.test.default(epi$F13postop, epi$Prov2rutinAPTT, use = "complete.obs", :
  Cannot compute exact p-value with ties
```

```
> #RESULT:
> plot(epi$F13postop, epi$Prov2rutinAPTT, xlab="", ylab = "", cex.axis=3,
cex=2.5, pch=19, axes=F)
> axis(side=1,lwd=4,cex.axis=3, labels=NA)
> axis(side=1,lwd=0,cex.axis=3, line=1)
> axis(side=2,lwd=4,cex.axis=3, labels=NA)
> axis(side=2,lwd=0,cex.axis=3, line=0)
>
>
> #F13 vs PIVKA
> cor.test(epi$F13postop, epi$PIVKAMpostop, use="complete.obs",
method="pearson")
```

Pearson's product-moment correlation

```
data: epi$F13postop and epi$PIVKAMpostop
t = -0.49414, df = 29, p-value = 0.6249
alternative hypothesis: true correlation is not equal to 0
95 percent confidence interval:
 -0.4317363 0.2717645
sample estimates:
      cor
-0.09137479
```

```
> cor.test(epi$F13postop, epi$PIVKAMpostop, use="complete.obs",
method="spearman")
```

Spearman's rank correlation rho

```
data: epi$F13postop and epi$PIVKAMpostop
S = 3830, p-value = 0.2168
alternative hypothesis: true rho is not equal to 0
sample estimates:
      rho
0.2278226
```

```

> #RESULT:
> plot(epi$F13postop, epi$PIVKAMpostop, xlab="", ylab = "", cex.axis=3,
cex=2.5, pch=19, axes=F)
> axis(side=1,lwd=4,cex.axis=3, labels=NA)
> axis(side=1,lwd=0,cex.axis=3, line=1)
> axis(side=2,lwd=4,cex.axis=3, labels=NA)
> axis(side=2,lwd=0,cex.axis=3, line=0)
>
>
> #F13 vs CRP
> cor.test(epi$F13postop, epi$Prov2rutinCRP, use="complete.obs",
method="pearson")

```

Pearson's product-moment correlation

```

data: epi$F13postop and epi$Prov2rutinCRP
t = -0.27037, df = 26, p-value = 0.789
alternative hypothesis: true correlation is not equal to 0
95 percent confidence interval:
 -0.4177741  0.3265782
sample estimates:
      cor
-0.05295006

```

```

> cor.test(epi$F13postop, epi$Prov2rutinCRP, use="complete.obs",
method="spearman")

```

Spearman's rank correlation rho

```

data: epi$F13postop and epi$Prov2rutinCRP
S = 3859.1, p-value = 0.7767
alternative hypothesis: true rho is not equal to 0
sample estimates:
      rho
-0.05611826

```

Warning message:

```

In cor.test.default(epi$F13postop, epi$Prov2rutinCRP, use = "complete.obs", :
  Cannot compute exact p-value with ties

```

```

> #RESULT:
> plot(epi$F13postop, epi$Prov2rutinCRP, xlab="", ylab = "", cex.axis=3,
cex=2.5, pch=19, axes=F)
> axis(side=1,lwd=4,cex.axis=3, labels=NA)
> axis(side=1,lwd=0,cex.axis=3, line=1)
> axis(side=2,lwd=4,cex.axis=3, labels=NA)
> axis(side=2,lwd=0,cex.axis=3, line=0)
>
>
>
> #Fibrinogen vs PT-INR
> cor.test(epi$FIBpostop, epi$Prov2rutinPK, use="complete.obs",
method="pearson")

```

Pearson's product-moment correlation

```
data: epi$FIBpostop and epi$Prov2rutinPK
t = -0.25778, df = 29, p-value = 0.7984
alternative hypothesis: true correlation is not equal to 0
95 percent confidence interval:
-0.3954537 0.3118094
sample estimates:
      cor
-0.04781344
```

```
> cor.test(epi$FIBpostop, epi$Prov2rutinPK, use="complete.obs",
method="spearman")
```

Spearman's rank correlation rho

```
data: epi$FIBpostop and epi$Prov2rutinPK
S = 4845, p-value = 0.9015
alternative hypothesis: true rho is not equal to 0
sample estimates:
      rho
0.02318511
```

Warning message:

```
In cor.test.default(epi$FIBpostop, epi$Prov2rutinPK, use = "complete.obs", :
  Cannot compute exact p-value with ties
```

```
> #RESULT:
> plot(epi$FIBpostop, epi$Prov2rutinPK, xlab="", ylab = "", cex.axis=3,
cex=2.5, pch=19, axes=F)
> axis(side=1,lwd=4,cex.axis=3, labels=NA)
> axis(side=1,lwd=0,cex.axis=3, line=1)
> axis(side=2,lwd=4,cex.axis=3, labels=NA)
> axis(side=2,lwd=0,cex.axis=3, line=0)
>
>
> #FIB vs aPTT
> cor.test(epi$FIBpostop, epi$Prov2rutinAPTT, use="complete.obs",
method="pearson")
```

Pearson's product-moment correlation

```
data: epi$FIBpostop and epi$Prov2rutinAPTT
t = -0.033445, df = 29, p-value = 0.9735
alternative hypothesis: true correlation is not equal to 0
95 percent confidence interval:
-0.3597589 0.3488974
sample estimates:
      cor
-0.006210473
```

```
> cor.test(epi$FIBpostop, epi$Prov2rutinAPTT, use="complete.obs",
method="spearman")
```

Spearman's rank correlation rho

```
data: epi$FIBpostop and epi$Prov2rutinAPTT
S = 4704.6, p-value = 0.7833
alternative hypothesis: true rho is not equal to 0
```



```
sample estimates:
      rho
0.05148571
```

Warning message:

```
In cor.test.default(epi$FIBpostop, epi$Prov2rutinAPTT, use = "complete.obs", :
  Cannot compute exact p-value with ties
```

```
> #RESULT:
> plot(epi$FIBpostop, epi$Prov2rutinAPTT, xlab="", ylab = "", cex.axis=3,
cex=2.5, pch=19, axes=F)
> axis(side=1,lwd=4,cex.axis=3, labels=NA)
> axis(side=1,lwd=0,cex.axis=3, line=1)
> axis(side=2,lwd=4,cex.axis=3, labels=NA)
> axis(side=2,lwd=0,cex.axis=3, line=0)
>
>
> #FIB vs PIVKA
> cor.test(epi$FIBpostop, epi$PIVKAMpostop, use="complete.obs",
method="pearson")
```

Pearson's product-moment correlation

```
data: epi$FIBpostop and epi$PIVKAMpostop
t = 0.92809, df = 29, p-value = 0.361
alternative hypothesis: true correlation is not equal to 0
95 percent confidence interval:
 -0.1963158  0.4944241
sample estimates:
      cor
0.1698387
```

```
> cor.test(epi$FIBpostop, epi$PIVKAMpostop, use="complete.obs",
method="spearman")
```

Spearman's rank correlation rho

```
data: epi$FIBpostop and epi$PIVKAMpostop
S = 3822.1, p-value = 0.2144
alternative hypothesis: true rho is not equal to 0
sample estimates:
      rho
0.2294167
```

Warning message:

```
In cor.test.default(epi$FIBpostop, epi$PIVKAMpostop, use = "complete.obs", :
  Cannot compute exact p-value with ties
```

```
> #RESULT:
> plot(epi$FIBpostop, epi$PIVKAMpostop, xlab="", ylab = "", cex.axis=3,
cex=2.5, pch=19, axes=F)
> axis(side=1,lwd=4,cex.axis=3, labels=NA)
> axis(side=1,lwd=0,cex.axis=3, line=1)
> axis(side=2,lwd=4,cex.axis=3, labels=NA)
> axis(side=2,lwd=0,cex.axis=3, line=0)
>
>
> #FIB vs CRP
```

```
> cor.test(epi$FIBpostop, epi$Prov2rutinCRP, use="complete.obs",
method="pearson")
```

Pearson's product-moment correlation

```
data: epi$FIBpostop and epi$Prov2rutinCRP
t = 1.5779, df = 26, p-value = 0.1267
alternative hypothesis: true correlation is not equal to 0
95 percent confidence interval:
 -0.08706656  0.60226770
sample estimates:
      cor
0.2956126
```

```
> cor.test(epi$FIBpostop, epi$Prov2rutinCRP, use="complete.obs",
method="spearman")
```

Spearman's rank correlation rho

```
data: epi$FIBpostop and epi$Prov2rutinCRP
S = 2812, p-value = 0.2381
alternative hypothesis: true rho is not equal to 0
sample estimates:
      rho
0.2304426
```

Warning message:

```
In cor.test.default(epi$FIBpostop, epi$Prov2rutinCRP, use = "complete.obs", :
  Cannot compute exact p-value with ties
```

```
> #RESULT:
> plot(epi$FIBpostop, epi$Prov2rutinCRP, xlab="", ylab = "", cex.axis=3,
cex=2.5, pch=19, axes=F)
> axis(side=1,lwd=4,cex.axis=3, labels=NA)
> axis(side=1,lwd=0,cex.axis=3, line=1)
> axis(side=2,lwd=4,cex.axis=3, labels=NA)
> axis(side=2,lwd=0,cex.axis=3, line=0)
>
>
>
> #PIVKA vs PT-INR
> cor.test(epi$PIVKAMpostop, epi$Prov2rutinPK, use="complete.obs",
method="pearson")
```

Pearson's product-moment correlation

```
data: epi$PIVKAMpostop and epi$Prov2rutinPK
t = -0.61612, df = 29, p-value = 0.5426
alternative hypothesis: true correlation is not equal to 0
95 percent confidence interval:
 -0.4498893  0.2507709
sample estimates:
      cor
-0.1136697
```

```
> cor.test(epi$PIVKAMpostop, epi$Prov2rutinPK, use="complete.obs",
method="spearman")
```

Spearman's rank correlation rho

```
data: epi$PIVKAMpostop and epi$Prov2rutinPK
S = 5061.2, p-value = 0.9133
alternative hypothesis: true rho is not equal to 0
sample estimates:
      rho
-0.02039946
```

Warning message:

```
In cor.test.default(epi$PIVKAMpostop, epi$Prov2rutinPK, use =
"complete.obs", :
  Cannot compute exact p-value with ties
> #RESULT:
> plot(epi$PIVKAMpostop, epi$Prov2rutinPK, xlab="", ylab = "", cex.axis=3,
cex=2.5, pch=19, axes=F, xlim=c(0,140))
> axis(side=1,lwd=4,cex.axis=3, labels=NA)
> axis(side=1,lwd=0,cex.axis=3, line=1)
> axis(side=2,lwd=4,cex.axis=3, labels=NA)
> axis(side=2,lwd=0,cex.axis=3, line=0)
>
>
> #PIVKAM vs aPTT
> cor.test(epi$PIVKAMpostop, epi$Prov2rutinAPTT, use="complete.obs",
method="pearson")
```

Pearson's product-moment correlation

```
data: epi$PIVKAMpostop and epi$Prov2rutinAPTT
t = -1.239, df = 29, p-value = 0.2253
alternative hypothesis: true correlation is not equal to 0
95 percent confidence interval:
 -0.5359820  0.1413431
sample estimates:
      cor
-0.2242271
```

```
> cor.test(epi$PIVKAMpostop, epi$Prov2rutinAPTT, use="complete.obs",
method="spearman")
```

Spearman's rank correlation rho

```
data: epi$PIVKAMpostop and epi$Prov2rutinAPTT
S = 5129, p-value = 0.8556
alternative hypothesis: true rho is not equal to 0
sample estimates:
      rho
-0.03407076
```

Warning message:

```
In cor.test.default(epi$PIVKAMpostop, epi$Prov2rutinAPTT, use =
"complete.obs", :
  Cannot compute exact p-value with ties
> #RESULT:
> plot(epi$PIVKAMpostop, epi$Prov2rutinAPTT, xlab="", ylab = "", cex.axis=3,
```

```

cex=2.5, pch=19, axes=F, xlim=c(0,140))
> axis(side=1,lwd=4,cex.axis=3, labels=NA)
> axis(side=1,lwd=0,cex.axis=3, line=1)
> axis(side=2,lwd=4,cex.axis=3, labels=NA)
> axis(side=2,lwd=0,cex.axis=3, line=0)
>
>
> #PIVKAM vs PIVKA
> cor.test(eps$PIVKAMpostop, eps$PIVKAMpostop, use="complete.obs",
method="pearson")

```

Pearson's product-moment correlation

```

data: eps$PIVKAMpostop and eps$PIVKAMpostop
t = Inf, df = 29, p-value < 2.2e-16
alternative hypothesis: true correlation is not equal to 0
95 percent confidence interval:

```

```

 1 1
sample estimates:
cor
 1

```

```

> cor.test(eps$PIVKAMpostop, eps$PIVKAMpostop, use="complete.obs",
method="spearman")

```

Spearman's rank correlation rho

```

data: eps$PIVKAMpostop and eps$PIVKAMpostop
S = 0, p-value < 2.2e-16
alternative hypothesis: true rho is not equal to 0
sample estimates:

```

```

rho
 1

```

```

> #RESULT:
> plot(eps$PIVKAMpostop, eps$PIVKAMpostop, xlab="", ylab = "", cex.axis=3,
cex=2.5, pch=19, axes=F)
> axis(side=1,lwd=4,cex.axis=3, labels=NA)
> axis(side=1,lwd=0,cex.axis=3, line=1)
> axis(side=2,lwd=4,cex.axis=3, labels=NA)
> axis(side=2,lwd=0,cex.axis=3, line=0)
>
>
> #PIVKAM vs CRP
> cor.test(eps$PIVKAMpostop, eps$Prov2rutiCRP, use="complete.obs",
method="pearson")

```

Pearson's product-moment correlation

```

data: eps$PIVKAMpostop and eps$Prov2rutiCRP
t = -1.0739, df = 26, p-value = 0.2927
alternative hypothesis: true correlation is not equal to 0
95 percent confidence interval:

```

```

-0.5378138  0.1808981
sample estimates:
cor

```

-0.2060874

```
> cor.test(epi$PIVKAMpostop, epi$Prov2rutinCRP, use="complete.obs",  
method="spearman")
```

Spearman's rank correlation rho

```
data: epi$PIVKAMpostop and epi$Prov2rutinCRP  
S = 4800.3, p-value = 0.104  
alternative hypothesis: true rho is not equal to 0  
sample estimates:  
rho  
-0.3137148
```

Warning message:

```
In cor.test.default(epi$PIVKAMpostop, epi$Prov2rutinCRP, use =  
"complete.obs", :
```

```
Cannot compute exact p-value with ties
```

```
> #RESULT:
```

```
> plot(epi$PIVKAMpostop, epi$Prov2rutinCRP, xlab="", ylab = "", cex.axis=3,  
cex=2.5, pch=19, axes=F, xlim=c(0,140))
```

```
> axis(side=1,lwd=4,cex.axis=3, labels=NA)
```

```
> axis(side=1,lwd=0,cex.axis=3, line=1)
```

```
> axis(side=2,lwd=4,cex.axis=3, labels=NA)
```

```
> axis(side=2,lwd=0,cex.axis=3, line=0)
```

```
>
```

```
>
```

```
> #Plc vs PT-INR
```

```
> cor.test(epi$Prov2rutinTPK, epi$Prov2rutinPK, use="complete.obs",  
method="pearson")
```

Pearson's product-moment correlation

```
data: epi$Prov2rutinTPK and epi$Prov2rutinPK  
t = -0.51222, df = 29, p-value = 0.6124  
alternative hypothesis: true correlation is not equal to 0  
95 percent confidence interval:  
-0.4344523 0.2686654  
sample estimates:  
cor  
-0.09468899
```

```
> cor.test(epi$Prov2rutinTPK, epi$Prov2rutinPK, use="complete.obs",  
method="spearman")
```

Spearman's rank correlation rho

```
data: epi$Prov2rutinTPK and epi$Prov2rutinPK  
S = 5501.5, p-value = 0.5588  
alternative hypothesis: true rho is not equal to 0  
sample estimates:  
rho  
-0.1091649
```

Warning message:

```
In cor.test.default(epi$Prov2rutinTPK, epi$Prov2rutinPK, use =
```

```

"complete.obs", :
  Cannot compute exact p-value with ties
> #RESULT:
> plot(epi$Prov2rutinTPK, epi$Prov2rutinPK, xlab="", ylab = "", cex.axis=3,
cex=2.5, pch=19, axes=F)
> axis(side=1,lwd=4,cex.axis=3, labels=NA)
> axis(side=1,lwd=0,cex.axis=3, line=1)
> axis(side=2,lwd=4,cex.axis=3, labels=NA)
> axis(side=2,lwd=0,cex.axis=3, line=0)
>
>
> #Prov2rutinTPK vs aPTT
> cor.test(epi$Prov2rutinTPK, epi$Prov2rutinAPTT, use="complete.obs",
method="pearson")

```

Pearson's product-moment correlation

```

data: epi$Prov2rutinTPK and epi$Prov2rutinAPTT
t = -0.6246, df = 29, p-value = 0.5371
alternative hypothesis: true correlation is not equal to 0
95 percent confidence interval:
 -0.4511352  0.2493055
sample estimates:
      cor
-0.1152124

```

```

> cor.test(epi$Prov2rutinTPK, epi$Prov2rutinAPTT, use="complete.obs",
method="spearman")

```

Spearman's rank correlation rho

```

data: epi$Prov2rutinTPK and epi$Prov2rutinAPTT
S = 5473.7, p-value = 0.5793
alternative hypothesis: true rho is not equal to 0
sample estimates:
      rho
-0.1035621

```

Warning message:

```

In cor.test.default(epi$Prov2rutinTPK, epi$Prov2rutinAPTT, use =
"complete.obs", :
  Cannot compute exact p-value with ties
> #RESULT:
> plot(epi$Prov2rutinTPK, epi$Prov2rutinAPTT, xlab="", ylab = "", cex.axis=3,
cex=2.5, pch=19, axes=F)
> axis(side=1,lwd=4,cex.axis=3, labels=NA)
> axis(side=1,lwd=0,cex.axis=3, line=1)
> axis(side=2,lwd=4,cex.axis=3, labels=NA)
> axis(side=2,lwd=0,cex.axis=3, line=0)
>
>
> #Prov2rutinTPK vs PIVKA
> cor.test(epi$Prov2rutinTPK, epi$PIVKAMpostop, use="complete.obs",
method="pearson")

```

Pearson's product-moment correlation

```
data: epi$Prov2rutinTPK and epi$PIVKAMpostop
t = -0.55884, df = 27, p-value = 0.5809
alternative hypothesis: true correlation is not equal to 0
95 percent confidence interval:
 -0.4555833  0.2701612
sample estimates:
      cor
-0.1069325
```

```
> cor.test(epi$Prov2rutinTPK, epi$PIVKAMpostop, use="complete.obs",
method="spearman")
```

Spearman's rank correlation rho

```
data: epi$Prov2rutinTPK and epi$PIVKAMpostop
S = 4468.1, p-value = 0.6039
alternative hypothesis: true rho is not equal to 0
sample estimates:
      rho
-0.100505
```

Warning message:

```
In cor.test.default(epi$Prov2rutinTPK, epi$PIVKAMpostop, use =
"complete.obs", :
```

```
Cannot compute exact p-value with ties
```

```
> #RESULT:
```

```
> plot(epi$Prov2rutinTPK, epi$PIVKAMpostop, xlab="", ylab = "", cex.axis=3,
cex=2.5, pch=19, axes=F,ylim=c(0,130))
```

```
>
```

```
>
```

```
>
```

```
> #Prov2rutinTPK vs CRP
```

```
> cor.test(epi$Prov2rutinTPK, epi$Prov2rutinCRP, use="complete.obs",
method="pearson")
```

Pearson's product-moment correlation

```
data: epi$Prov2rutinTPK and epi$Prov2rutinCRP
t = -1.4718, df = 28, p-value = 0.1522
alternative hypothesis: true correlation is not equal to 0
95 percent confidence interval:
 -0.5729300  0.1021591
sample estimates:
      cor
-0.2679728
```

```
> cor.test(epi$Prov2rutinTPK, epi$Prov2rutinCRP, use="complete.obs",
method="spearman")
```

Spearman's rank correlation rho

```
data: epi$Prov2rutinTPK and epi$Prov2rutinCRP
S = 4873.1, p-value = 0.6585
alternative hypothesis: true rho is not equal to 0
sample estimates:
```

```
rho
-0.08412151
```

Warning message:

```
In cor.test.default(epi$Prov2rutinTPK, epi$Prov2rutinCRP, use =
"complete.obs", :
```

```
Cannot compute exact p-value with ties
```

```
> #RESULT:
```

```
> plot(epi$Prov2rutinTPK, epi$Prov2rutinCRP, xlab="", ylab = "", cex.axis=3,
cex=2.5, pch=19, axes=F)
```

```
> axis(side=1,lwd=4,cex.axis=3, labels=NA)
```

```
> axis(side=1,lwd=0,cex.axis=3, line=1)
```

```
> axis(side=2,lwd=4,cex.axis=3, labels=NA)
```

```
> axis(side=2,lwd=0,cex.axis=3, line=0)
```

```
>
```

```
>
```

```
> #Prov2extemMCF vs PIVKA
```

```
> cor.test(epi$Prov2extemMCF, epi$PIVKAMpostop, use="complete.obs",
method="pearson")
```

Pearson's product-moment correlation

```
data: epi$Prov2extemMCF and epi$PIVKAMpostop
```

```
t = -0.89872, df = 29, p-value = 0.3762
```

```
alternative hypothesis: true correlation is not equal to 0
```

```
95 percent confidence interval:
```

```
-0.4903501 0.2014808
```

```
sample estimates:
```

```
cor
```

```
-0.1646114
```

```
> cor.test(epi$Prov2extemMCF, epi$PIVKAMpostop, use="complete.obs",
method="spearman")
```

Spearman's rank correlation rho

```
data: epi$Prov2extemMCF and epi$PIVKAMpostop
```

```
S = 6448.9, p-value = 0.1009
```

```
alternative hypothesis: true rho is not equal to 0
```

```
sample estimates:
```

```
rho
```

```
-0.3001744
```

Warning message:

```
In cor.test.default(epi$Prov2extemMCF, epi$PIVKAMpostop, use =
"complete.obs", :
```

```
Cannot compute exact p-value with ties
```

```
> #RESULT:
```

```
> plot(epi$Prov2extemMCF, epi$PIVKAMpostop, xlab="", ylab = "", cex.axis=3,
cex=2.5, pch=19, axes=F)
```

```
> axis(side=1,lwd=4,cex.axis=3, labels=NA)
```

```
> axis(side=1,lwd=0,cex.axis=3, line=1)
```

```
> axis(side=2,lwd=4,cex.axis=3, labels=NA)
```

```
> axis(side=2,lwd=0,cex.axis=3, line=0)
```

```
>
```

```
> #Correlation between fibrinogen and Fibtem
```



```

> dev.new(width=5)
> # plot(epi$FIBpreop, epi$Prov2fibtemMCF, xlab="P-fibrinogen (g/L)", ylab =
"ROTEM FIBTEM MCF (mm)", abline(lm(epi$Prov2fibtemMCF~ epi
$FIBpreop)),cex.main=1.3, ylim=c(10,52),cex.lab=1.4, main="FIBTEM-MCF vs
Fibrinogen")
> plot(epi$FIBpreop, epi$Prov2fibtemMCF, xlab="P-fibrinogen (g/L)", ylab =
"ROTEM FIBTEM MCF (mm)",cex.main=1.3, ylim=c(10,52),cex.lab=1.4, main="FIBTEM-
MCF vs Fibrinogen")
> cor.test(epi$FIBpreop, epi$Prov2fibtemMCF, use="complete.obs",
method="pearson")

```

Pearson's product-moment correlation

```

data: epi$FIBpreop and epi$Prov2fibtemMCF
t = 1.3124, df = 30, p-value = 0.1993
alternative hypothesis: true correlation is not equal to 0
95 percent confidence interval:
-0.1259042 0.5379999
sample estimates:
cor
0.2330198

```

```

> cor.test(epi$FIBpreop, epi$Prov2fibtemMCF, use="complete.obs",
method="spearman")

```

Spearman's rank correlation rho

```

data: epi$FIBpreop and epi$Prov2fibtemMCF
S = 4097, p-value = 0.1692
alternative hypothesis: true rho is not equal to 0
sample estimates:
rho
0.2490805

```

Warning message:

```

In cor.test.default(epi$FIBpreop, epi$Prov2fibtemMCF, use = "complete.obs", :
Cannot compute exact p-value with ties

```

```

> #result: NS
> # text(x=6, y=41, "N/S", pos=3, cex=2)
> arrows(1.85,9,,25,code=0,lwd=2,lty=3)
> arrows(2,9,4,,code=0,lwd=2,lty=3)
>
>
> plot(epi$FIBpostop, epi$Prov2fibtemMCF, xlab="", ylab = "", cex.axis=3,
cex=2.5, pch=19, axes=F)
> axis(side=1,lwd=4,cex.axis=3, labels=NA)
> axis(side=1,lwd=0,cex.axis=3, line=1)
> axis(side=2,lwd=4,cex.axis=3)
> #axis(side=2,lwd=4,cex.axis=3)
>
>
> #Correlation between fibrinogen and withdrawal time
>
> plot(epi$withdrawaltime, epi$FIBpreop, xlab="Day of epidural withdrawal",
ylab = "P-fibrinogen (g/L)",abline(lm(epi$FIBpreop~epi
$withdrawaltime)),cex.main=1.3, cex.lab=1.4)

```

```
> cor.test(eps$withdrawaltime, eps$FIBpreop, use="complete.obs",
method="pearson")
```

Pearson's product-moment correlation

```
data: eps$withdrawaltime and eps$FIBpreop
t = 0.50375, df = 30, p-value = 0.6181
alternative hypothesis: true correlation is not equal to 0
95 percent confidence interval:
 -0.2655909 0.4266535
sample estimates:
      cor
0.09158469
```

```
> cor.test(eps$withdrawaltime, eps$FIBpreop, use="complete.obs",
method="spearman")
```

Spearman's rank correlation rho

```
data: eps$withdrawaltime and eps$FIBpreop
S = 4996.4, p-value = 0.6467
alternative hypothesis: true rho is not equal to 0
sample estimates:
      rho
0.0842434
```

Warning message:

```
In cor.test.default(eps$withdrawaltime, eps$FIBpreop, use = "complete.obs", :
  Cannot compute exact p-value with ties
> text(x=14, y=4.5, "N/S", pos=3, cex=2)
> #text(x=13, y=640, "r=0.56", pos=3, cex=2)
>
> #Correlation between aPTT and INTEM-MCF
>
> plot(eps$Prov2rutinAPTT, eps$Prov2intemMCF, xlab="aPTT (s)", ylab = "ROTEM
INTEM MCF (mm)", abline(lm(eps$Prov2intemMCF~eps$Prov2rutinAPTT)),cex.main=1.3,
cex.lab=1.4)
> cor.test(eps$Prov2rutinAPTT, eps$Prov2intemMCF, use="complete.obs",
method="pearson")
```

Pearson's product-moment correlation

```
data: eps$Prov2rutinAPTT and eps$Prov2intemMCF
t = -0.34078, df = 31, p-value = 0.7356
alternative hypothesis: true correlation is not equal to 0
95 percent confidence interval:
 -0.3960925 0.2882640
sample estimates:
      cor
-0.06109077
```

```
> cor.test(eps$Prov2rutinAPTT, eps$Prov2intemMCF, use="complete.obs",
method="spearman")
```

Spearman's rank correlation rho

```
data: epi$Prov2rutinAPTT and epi$Prov2intemMCF
S = 5773.4, p-value = 0.8459
alternative hypothesis: true rho is not equal to 0
sample estimates:
      rho
0.03518698
```

Warning message:

```
In cor.test.default(epi$Prov2rutinAPTT, epi$Prov2intemMCF, use =
"complete.obs", :
  Cannot compute exact p-value with ties
> text(x=40, y=62, "N/S", pos=3, cex=2)
> #text(x=13, y=640, "r=0.56", pos=3, cex=2)
>
> #Correlation between aPTT and INTEM-CT
>
> plot(epi$Prov2rutinAPTT, epi$Prov2intemCT, xlab="aPTT (s)", ylab = "ROTEM
INTEM CT (s)", abline(lm(epi$Prov2intemCT~epi$Prov2rutinAPTT)),cex.main=1.3,
cex.lab=1.4)
> cor.test(epi$Prov2rutinAPTT, epi$Prov2intemCT, use="complete.obs",
method="pearson")
```

Pearson's product-moment correlation

```
data: epi$Prov2rutinAPTT and epi$Prov2intemCT
t = -0.89483, df = 31, p-value = 0.3778
alternative hypothesis: true correlation is not equal to 0
95 percent confidence interval:
 -0.4760559 0.1952656
sample estimates:
      cor
-0.1586808
```

```
> cor.test(epi$Prov2rutinAPTT, epi$Prov2intemCT, use="complete.obs",
method="spearman")
```

Spearman's rank correlation rho

```
data: epi$Prov2rutinAPTT and epi$Prov2intemCT
S = 6583.8, p-value = 0.5789
alternative hypothesis: true rho is not equal to 0
sample estimates:
      rho
-0.100237
```

Warning message:

```
In cor.test.default(epi$Prov2rutinAPTT, epi$Prov2intemCT, use =
"complete.obs", :
  Cannot compute exact p-value with ties
> text(x=39, y=170, "N/S", pos=3, cex=2)
> #text(x=13, y=640, "r=0.56", pos=3, cex=2)
>
> #Correlation between PT-INR and EXTEM-CT
> plot(epi$Prov2rutinPK, epi$Prov2extemCT, xlab="PT-INR", ylab = "ROTEM EXTEM
CT (s)", abline(lm(epi$Prov2extemCT~epi$Prov2rutinPK)),cex.main=1.3,
cex.lab=1.4)
```

```
> cor.test(eps$Prov2rutinPK, eps$Prov2extemCT, use="complete.obs",
method="pearson")
```

Pearson's product-moment correlation

```
data: eps$Prov2rutinPK and eps$Prov2extemCT
t = 1.1177, df = 31, p-value = 0.2723
alternative hypothesis: true correlation is not equal to 0
95 percent confidence interval:
 -0.1571117  0.5059370
sample estimates:
      cor
0.1968129
```

```
> cor.test(eps$Prov2rutinPK, eps$Prov2extemCT, use="complete.obs",
method="spearman")
```

Spearman's rank correlation rho

```
data: eps$Prov2rutinPK and eps$Prov2extemCT
S = 5462.4, p-value = 0.6296
alternative hypothesis: true rho is not equal to 0
sample estimates:
      rho
0.08716727
```

Warning message:

```
In cor.test.default(eps$Prov2rutinPK, eps$Prov2extemCT, use =
"complete.obs", :
```

```
Cannot compute exact p-value with ties
```

```
> text(x=1.5, y=45, "N/S", pos=3, cex=2)
```

```
> #text(x=13, y=640, "r=0.56", pos=3, cex=2)
```

```
>
```

```
>
```

```
>
```

```
> #Correlation between PT-INR and EXTEM-MCF
```

```
> plot(eps$Prov2rutinPK, eps$Prov2extemMCF, xlab="PT-INR", ylab = "ROTEM EXTEM
MCF (mm)", abline(lm(eps$Prov2extemMCF~eps$Prov2rutinPK)),cex.main=1.3,
cex.lab=1.4)
```

```
> cor.test(eps$Prov2rutinPK, eps$Prov2extemMCF, use="complete.obs",
method="pearson")
```

Pearson's product-moment correlation

```
data: eps$Prov2rutinPK and eps$Prov2extemMCF
t = -1.4426, df = 31, p-value = 0.1592
alternative hypothesis: true correlation is not equal to 0
95 percent confidence interval:
 -0.5470235  0.1012061
sample estimates:
      cor
-0.2508175
```

```
> cor.test(eps$Prov2rutinPK, eps$Prov2extemMCF, use="complete.obs",
method="spearman")
```

### Spearman's rank correlation rho

```
data: epi$Prov2rutinPK and epi$Prov2extemMCF
S = 6546.7, p-value = 0.6027
alternative hypothesis: true rho is not equal to 0
sample estimates:
      rho
-0.09402775
```

#### Warning message:

```
In cor.test.default(epi$Prov2rutinPK, epi$Prov2extemMCF, use =
"complete.obs", :
  Cannot compute exact p-value with ties
> text(x=1.5, y=65, "N/S", pos=3, cex=2)
> #text(x=13, y=640, "r=0.56", pos=3, cex=2)
>
>
>
> #Correlation between FII and PIVKA
> #Preop
> plot(epi$F2preop, epi$PIVKAMpreop, xlab="Preoperative FII (kIE/L)", ylab =
"Preoperative mean PIVKA (µg/L)", abline(lm(epi$PIVKAMpreop~epi
$F2preop)),cex.main=1.3, cex.lab=1.4)
> cor.test(epi$F2preop, epi$PIVKAMpreop, use="complete.obs", method="pearson")
```

### Pearson's product-moment correlation

```
data: epi$F2preop and epi$PIVKAMpreop
t = 0.81739, df = 36, p-value = 0.4191
alternative hypothesis: true correlation is not equal to 0
95 percent confidence interval:
 -0.1930289  0.4358591
sample estimates:
      cor
0.134984
```

```
> cor.test(epi$F2preop, epi$PIVKAMpreop, use="complete.obs", method="spearman")
```

### Spearman's rank correlation rho

```
data: epi$F2preop and epi$PIVKAMpreop
S = 7512.8, p-value = 0.2852
alternative hypothesis: true rho is not equal to 0
sample estimates:
      rho
0.177936
```

#### Warning message:

```
In cor.test.default(epi$F2preop, epi$PIVKAMpreop, use = "complete.obs", :
  Cannot compute exact p-value with ties
> text(x=1, y=10, "Spearman: Rho=0.17//P=0.029", pos=3, cex=2)
> text(x=1, y=20, "Pearson: t=0.81//P=0.042", pos=3, cex=2)
>
> #Postop
> plot(epi$postop, epi$PIVKAMpostop, xlab="Postoperative FII (kIE/L)", ylab =
```

```
"Postoperative mean PIVKA ( $\mu\text{g/L}$ )", abline(lm(epi$PIVKAMpostop~epi$F2postop)),cex.main=1.3, cex.lab=1.4)
```

```
Error in xy.coords(x, y, xlabel, ylabel, log) :  
'x' and 'y' lengths differ
```

```
> cor.test(epi$F2postop, epi$PIVKAMpostop, use="complete.obs",  
method="pearson")
```

Pearson's product-moment correlation

```
data: epi$F2postop and epi$PIVKAMpostop  
t = 0.62829, df = 29, p-value = 0.5347  
alternative hypothesis: true correlation is not equal to 0  
95 percent confidence interval:  
-0.2486658 0.4516782  
sample estimates:  
cor  
0.1158852
```

```
> cor.test(epi$F2postop, epi$PIVKAMpostop, use="complete.obs",  
method="spearman")
```

Spearman's rank correlation rho

```
data: epi$F2postop and epi$PIVKAMpostop  
S = 3200, p-value = 0.05082  
alternative hypothesis: true rho is not equal to 0  
sample estimates:  
rho  
0.3548387
```

```
> text(x=1.2, y=300, "Spearman: Rho=0.35//P=0.051", pos=3, cex=2)  
> text(x=1, y=200, "Pearson: t=0.62//P=0.53", pos=3, cex=2)
```

```
>
```

```
> #####
```

```
> #Correlation between postop extem MCF och F13.
```

```
> plot(epi$Prov2extemMCF, epi$F13postop, xlab="postop extem MCF", ylab =  
"postop F13", abline(lm(epi$F13postop~epi$Prov2extemMCF)),cex.main=1.3,  
cex.lab=1.4)
```

```
> cor.test(epi$Prov2extemMCF, epi$F13postop, use="complete.obs",  
method="pearson")
```

Pearson's product-moment correlation

```
data: epi$Prov2extemMCF and epi$F13postop  
t = 2.6074, df = 29, p-value = 0.01426  
alternative hypothesis: true correlation is not equal to 0  
95 percent confidence interval:  
0.09631896 0.68443758  
sample estimates:  
cor  
0.4357859
```

```
> cor.test(epi$Prov2extemMCF, epi$F13postop, use="complete.obs",  
method="spearman")
```

Spearman's rank correlation rho

```
data: epi$Prov2extemMCF and epi$F13postop
S = 3359.7, p-value = 0.07668
alternative hypothesis: true rho is not equal to 0
sample estimates:
      rho
0.3226419
```

Warning message:

```
In cor.test.default(epi$Prov2extemMCF, epi$F13postop, use = "complete.obs", :
  Cannot compute exact p-value with ties
```

```
>
> #Correlation between postop intem MCF och F13.
> plot(epi$Prov2intemMCF, epi$F13postop, xlab="postop intem MCF", ylab =
"postop F13", abline(lm(epi$F13postop~epi$Prov2intemMCF)),cex.main=1.3,
cex.lab=1.4)
> cor.test(epi$Prov2intemMCF, epi$F13postop, use="complete.obs",
method="pearson")
```

Pearson's product-moment correlation

```
data: epi$Prov2intemMCF and epi$F13postop
t = 1.7327, df = 29, p-value = 0.09377
alternative hypothesis: true correlation is not equal to 0
95 percent confidence interval:
 -0.05389246  0.59595588
sample estimates:
      cor
0.3062968
```

```
> cor.test(epi$Prov2intemMCF, epi$F13postop, use="complete.obs",
method="spearman")
```

Spearman's rank correlation rho

```
data: epi$Prov2intemMCF and epi$F13postop
S = 3332.6, p-value = 0.07155
alternative hypothesis: true rho is not equal to 0
sample estimates:
      rho
0.3281047
```

Warning message:

```
In cor.test.default(epi$Prov2intemMCF, epi$F13postop, use = "complete.obs", :
  Cannot compute exact p-value with ties
```

```
>
> #Correlation between postop fibtem MCF och F13.
> plot(epi$Prov2fibtemMCF, epi$F13postop, xlab="postop fibtem MCF", ylab =
"postop F13", abline(lm(epi$F13postop~epi$Prov2fibtemMCF)),cex.main=1.3,
cex.lab=1.4)
> cor.test(epi$Prov2fibtemMCF, epi$F13postop, use="complete.obs",
method="pearson")
```

Pearson's product-moment correlation

```
data: epi$Prov2fibtemMCF and epi$F13postop
```

```
t = 2.8328, df = 29, p-value = 0.008309
alternative hypothesis: true correlation is not equal to 0
95 percent confidence interval:
 0.1331763 0.7037890
sample estimates:
      cor
0.4655473
```

```
> cor.test(eps$Prov2fibtemMCF, eps$F13postop, use="complete.obs",
method="spearman")
```

Spearman's rank correlation rho

```
data: eps$Prov2fibtemMCF and eps$F13postop
S = 2650.5, p-value = 0.008296
alternative hypothesis: true rho is not equal to 0
sample estimates:
      rho
0.4656307
```

Warning message:

```
In cor.test.default(eps$Prov2fibtemMCF, eps$F13postop, use = "complete.obs", :
  Cannot compute exact p-value with ties
```

```
>
```
